# Supplementary material
Source: MDPI journal article supplement (https://www.mdpi.com/2304-6740/10/3/37)
Supplement: s1 [file s1]

## $^1\text{H}$ -NMR spectra of the synthesized dithiocarbamate ligands

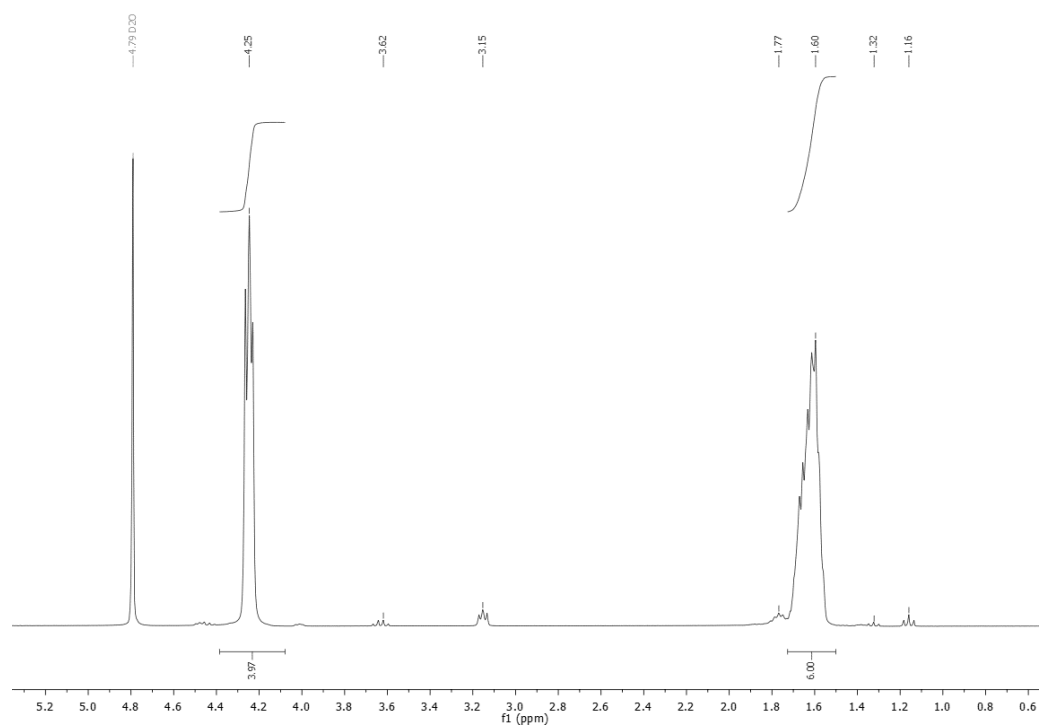

**Figure S1:**  $^1\text{H}$ -NMR ( $\text{D}_2\text{O}$ , 300.13 MHz, 298 K) spectrum of piperidine dithiocarbamate potassium salt (K(pipeDTC)).

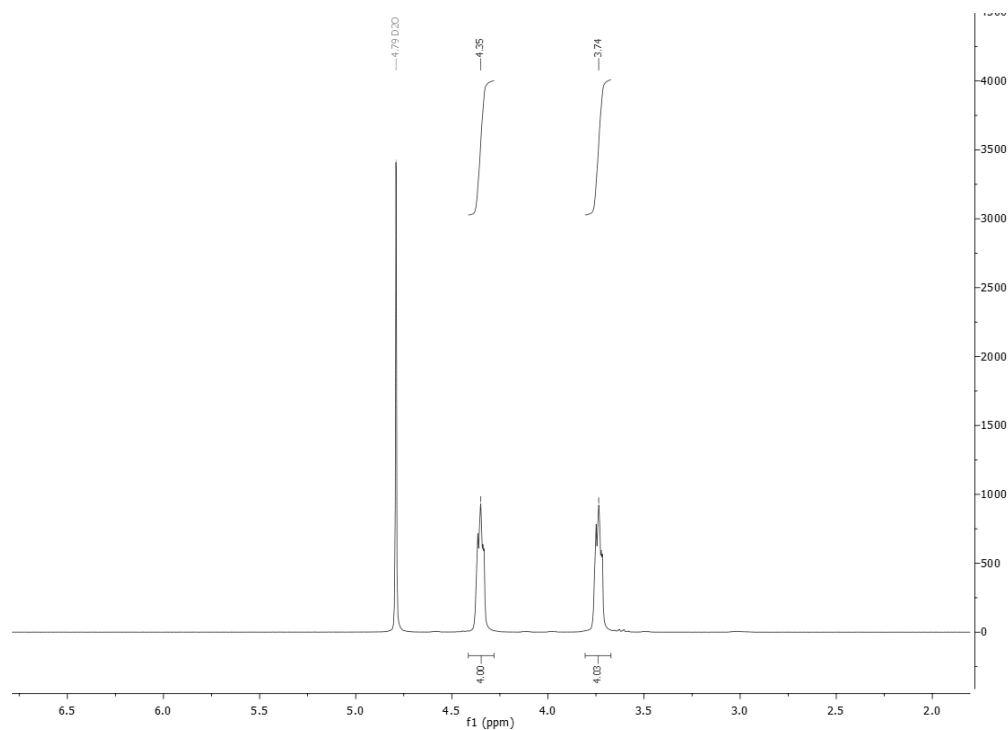

**Figure S2:**  $^1\text{H}$ -NMR ( $\text{D}_2\text{O}$ , 300.13 MHz, 298 K) spectrum of morpholine dithiocarbamate potassium salt (K(morphDTC)).

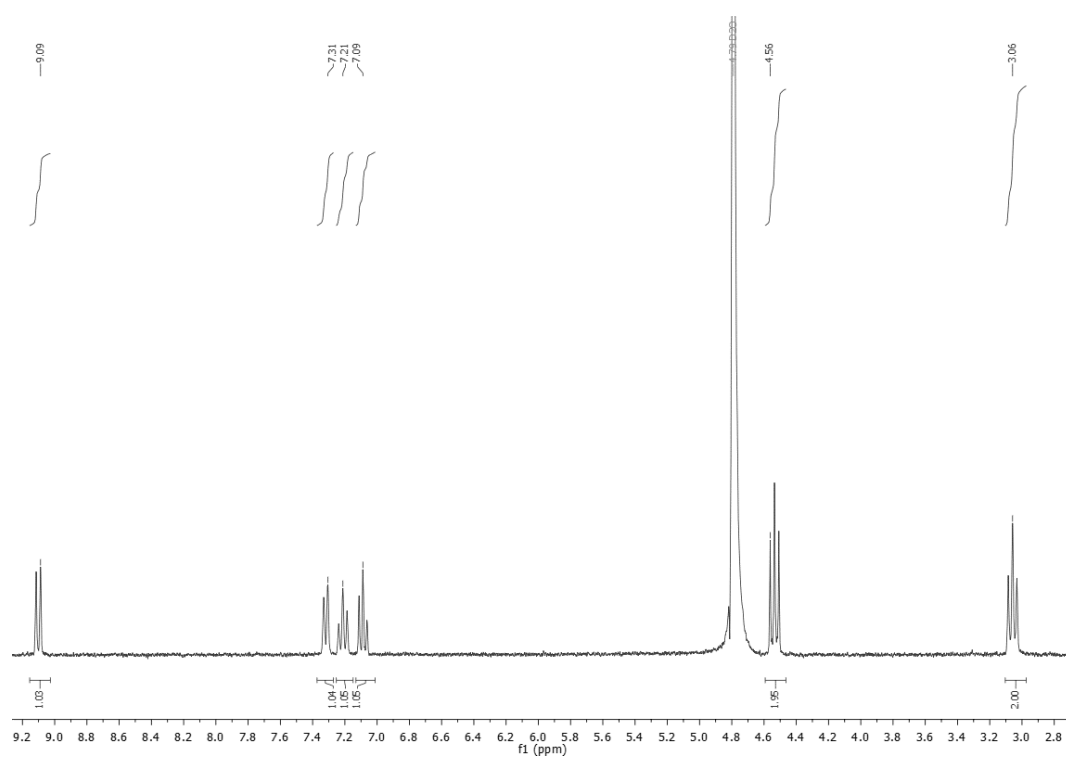

**Figure S3:**  $^1\text{H}$ -NMR ( $\text{D}_2\text{O}$ , 300.13 MHz, 298 K) spectrum of indoline dithiocarbamate sodium salt (K(indolineDTC)).

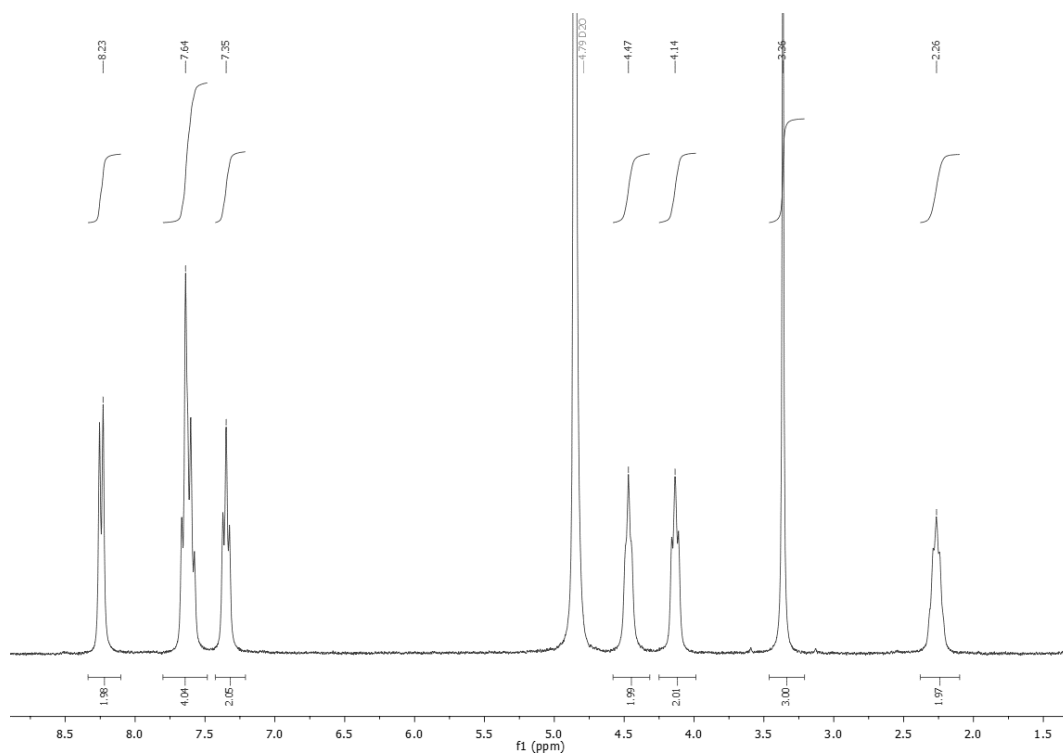

**Figure S4:**  $^1\text{H}$ -NMR ( $\text{D}_2\text{O}$ , 300.13 MHz, 298 K) spectrum of *N*-methyl-*N*-propyl-carbazole dithiocarbamate sodium salt ( $\text{Na}(\text{Carbz-pr-}N(\text{Me})\text{-DTC})$ ).

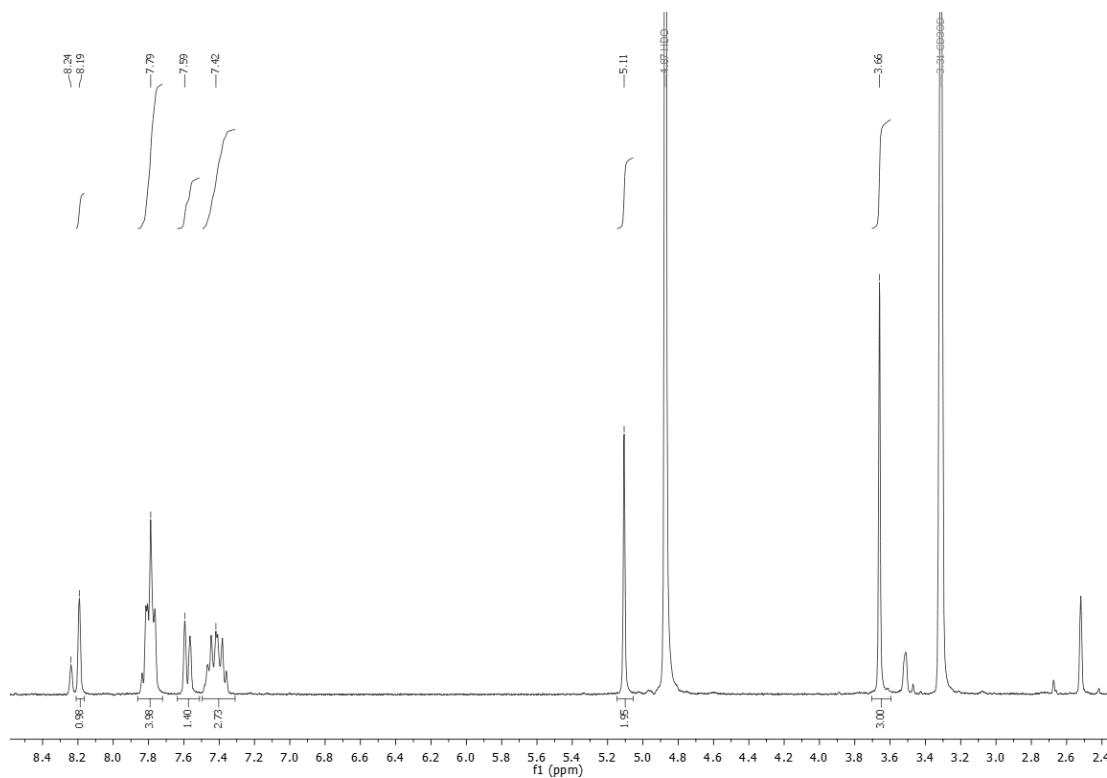

**Figure S5:**  $^1\text{H}$ -NMR ( $\text{MeOH-}d_4$ , 300.13 MHz, 298 K) spectrum of Methyl(2-(naphthalen-2-ylamino)-2-oxoethyl)dithiocarbamate potassium salt ( $\text{K}(\beta\text{-Napht-Sar-DTC})$ ).

**$^1\text{H}$ -NMR spectra of the synthesized  $[\text{Ru}_2(\text{DTC})_x(\text{DTC}')_{(5-x)}]\text{Br}$  complexes**

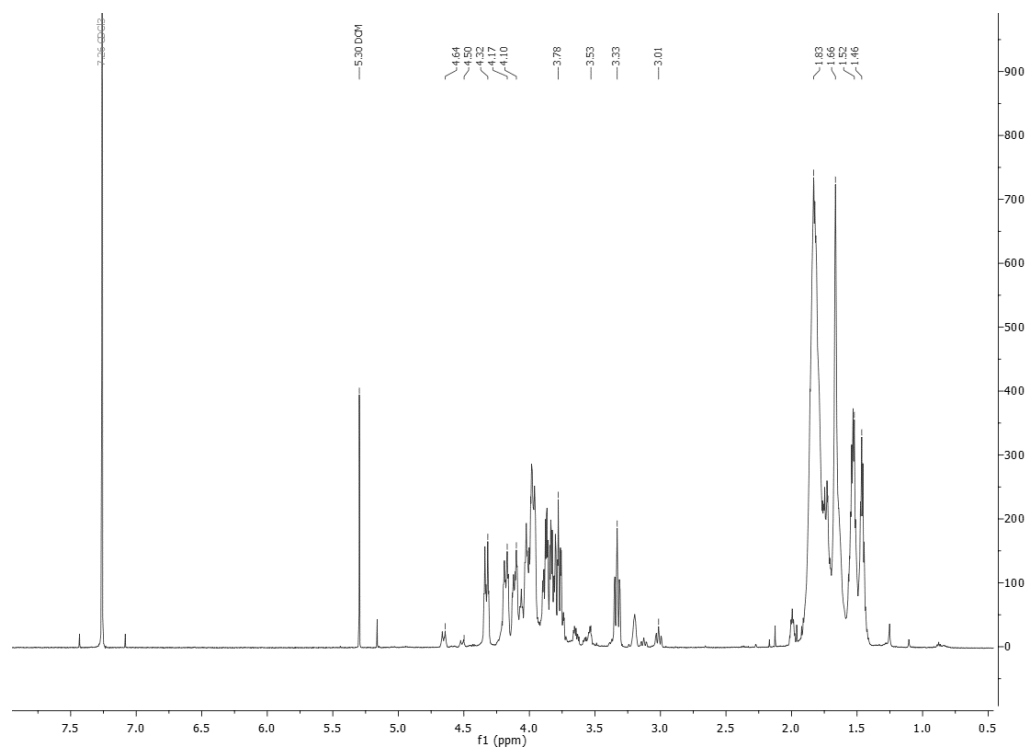

**Figure S6:**  $^1\text{H}$ -NMR spectrum ( $\text{CDCl}_3$ , 599.90 MHz, 298 K) of pentakis(piperidine dithiocarbamate)diruthenium(III) bromide,  $[\text{Ru}_2(\text{pipeDTC})_5]\text{Br}$ .

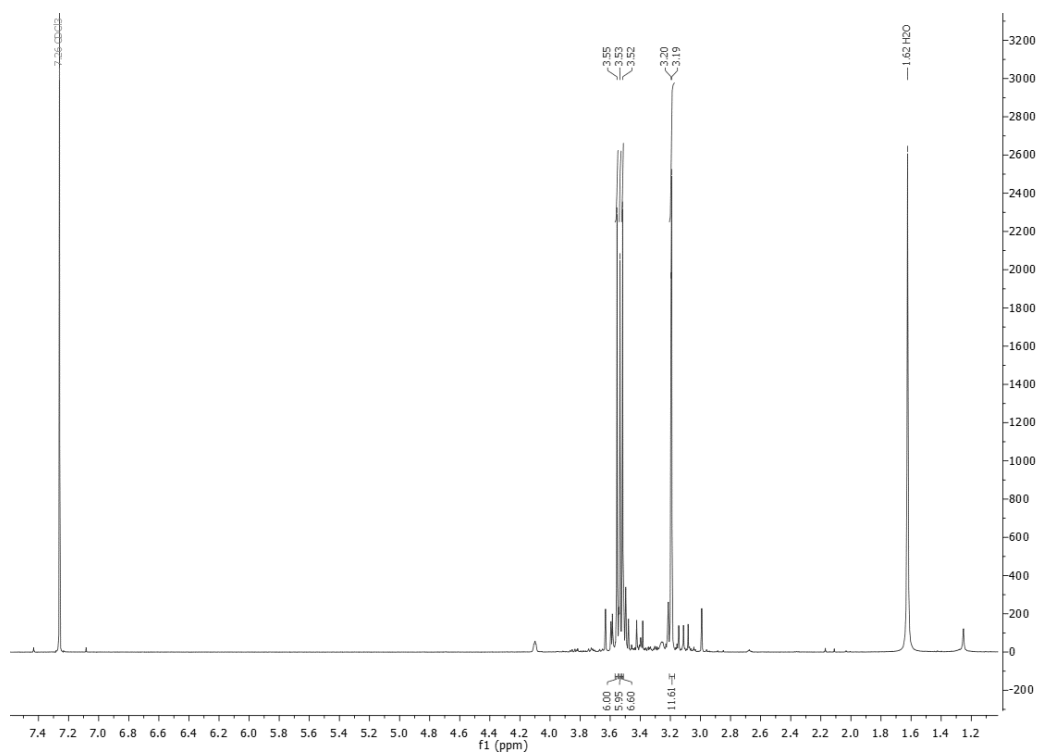

**Figure S7:**  $^1\text{H}$ -NMR spectrum ( $\text{CDCl}_3$ , 599.90 MHz, 298 K) of pentakis(dimethyl dithiocarbamate)diruthenium(III) bromide,  $[\text{Ru}_2(\text{DMDT})_5]\text{Br}$ .

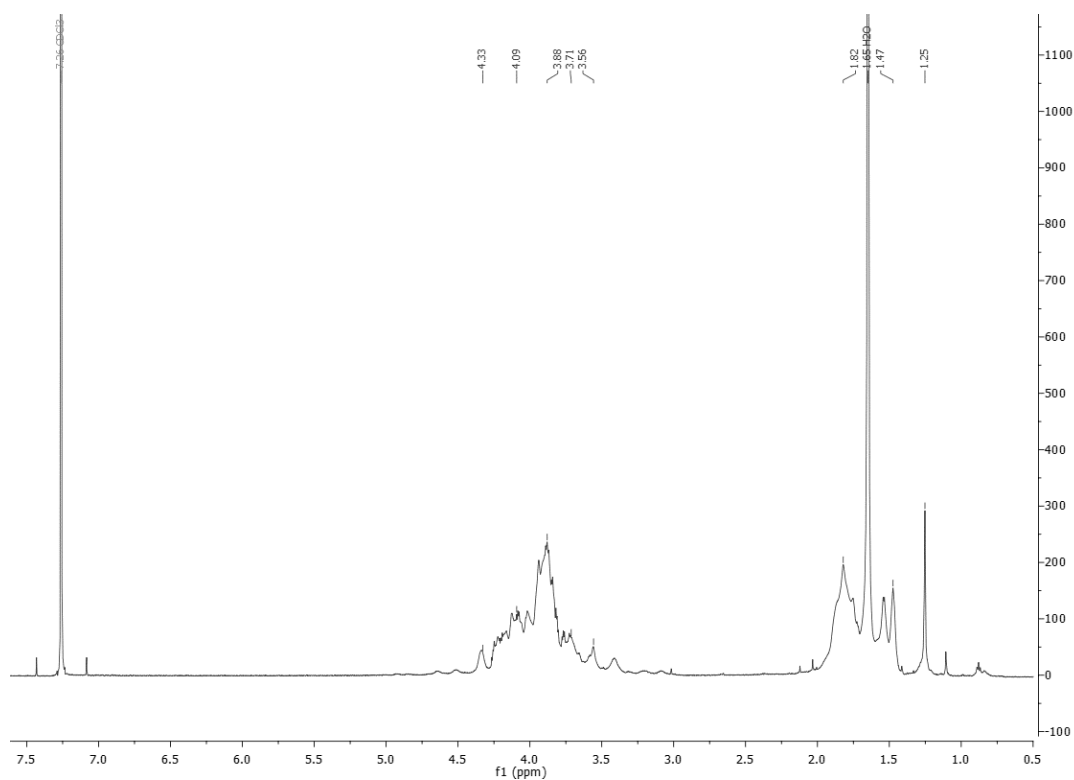

**Figure S8:**  $^1\text{H}$ -NMR spectrum ( $\text{CDCl}_3$ , 599.90 MHz, 298 K) of tris(piperidine dithiocarbamate)-bis(morpholine dithiocarbamate)diruthenium(III) bromide,  $[\text{Ru}_2(\text{pipeDTC})_3(\text{morphDTC})_2]\text{Br}$ .

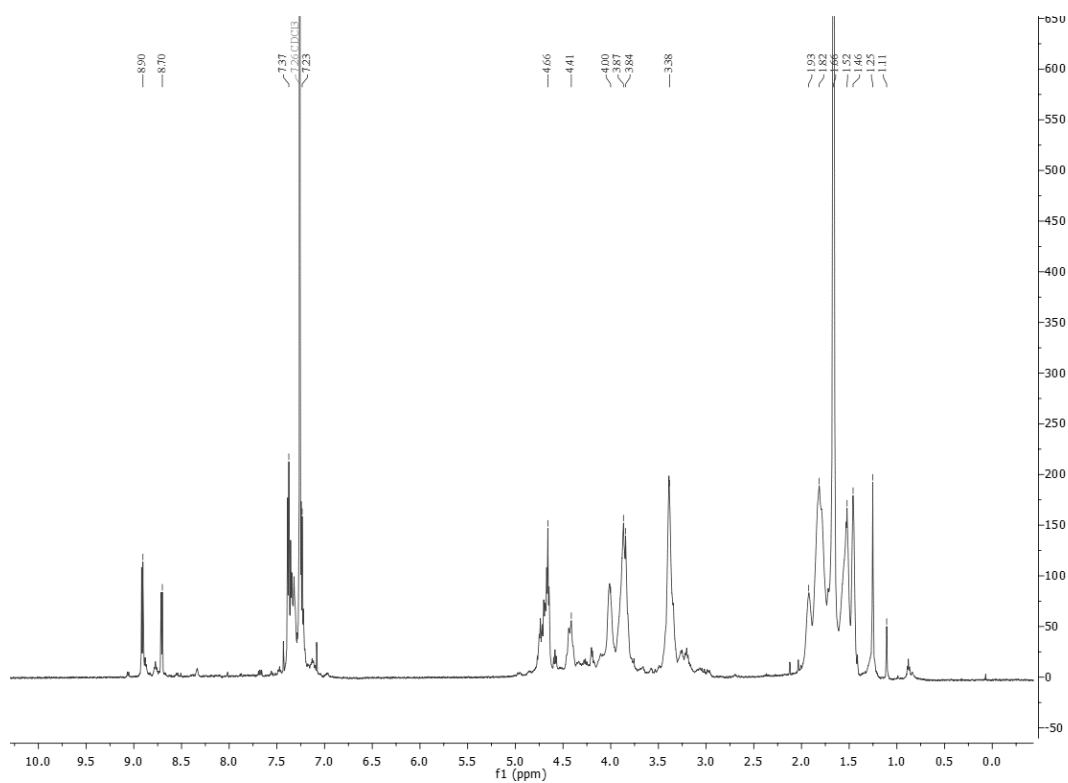

**Figure S9:**  $^1\text{H}$ -NMR spectrum (CDCl<sub>3</sub>, 599.90 MHz, 298 K) of [Ru<sub>2</sub>(pipeDTC)<sub>x</sub>(indolineDTC)<sub>y</sub>]Br.

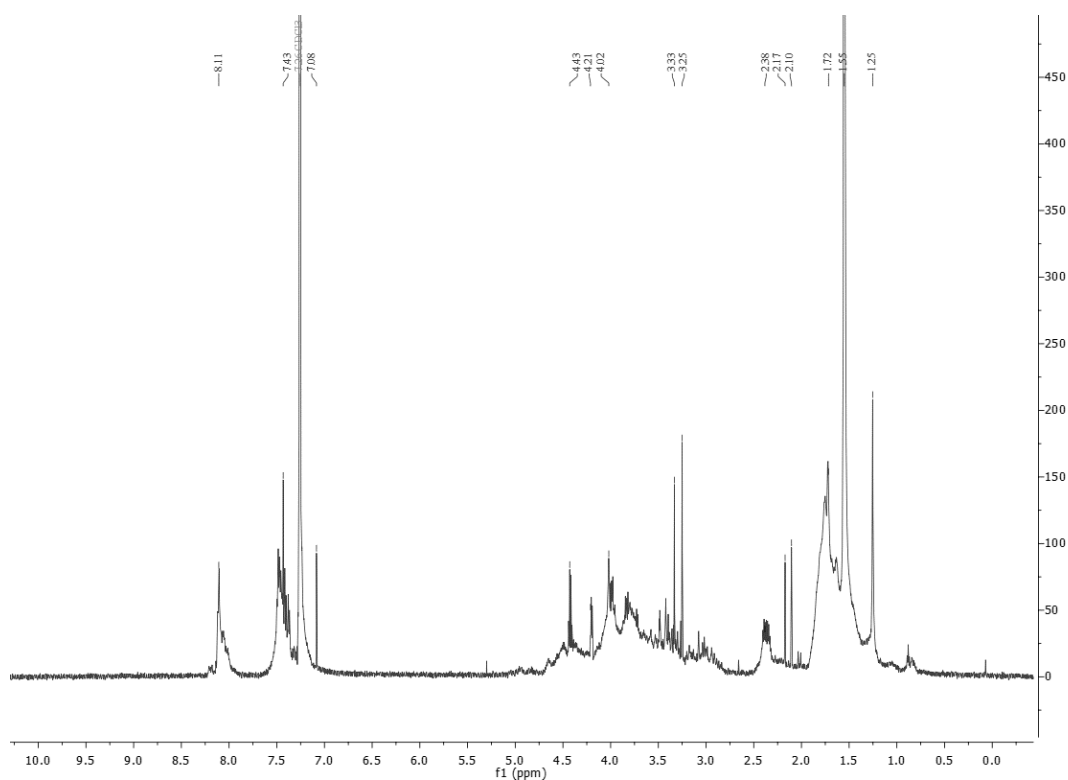

**Figure S10:**  $^1\text{H}$ -NMR spectrum (CDCl<sub>3</sub>, 599.90 MHz, 298 K) of [Ru<sub>2</sub>(pipeDTC)<sub>x</sub>(Carbz-pr-N(Me)-DTC)<sub>y</sub>]Br.

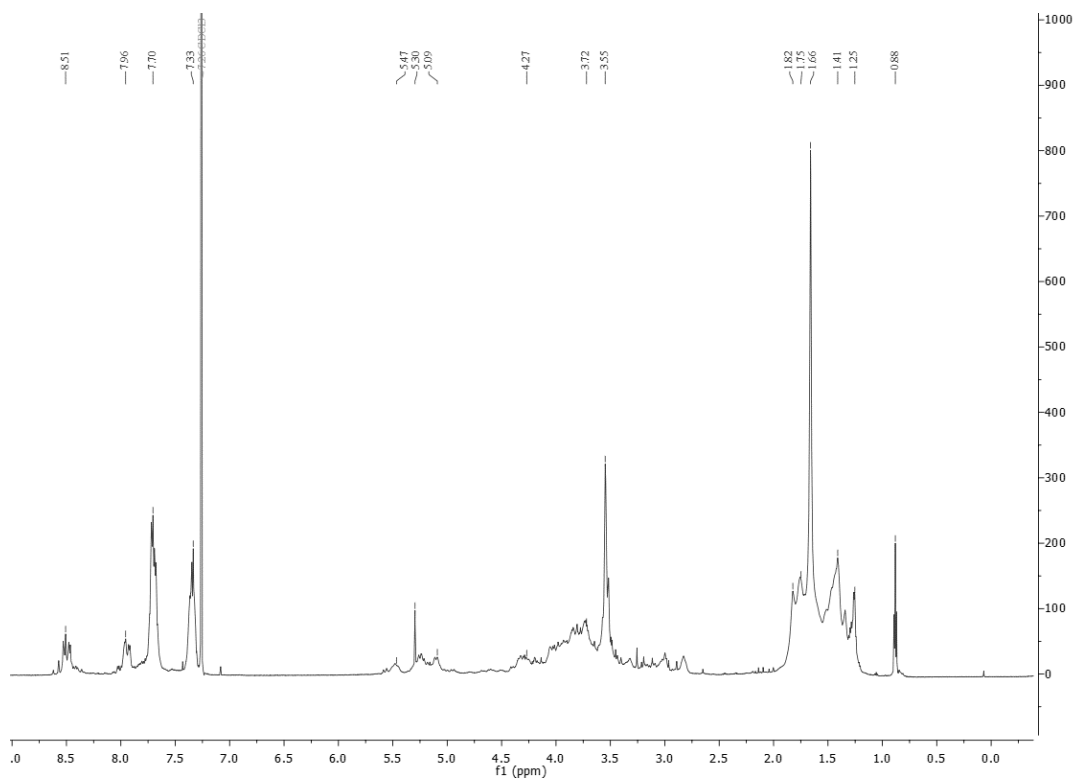

**Figure S11:**  $^1\text{H}$ -NMR spectrum ( $\text{CDCl}_3$ , 599.90 MHz, 298 K) of  $[\text{Ru}_2(\text{pipeDTC})_x(\beta\text{-Napht-Sar-DTC})_y]\text{Br}$ .

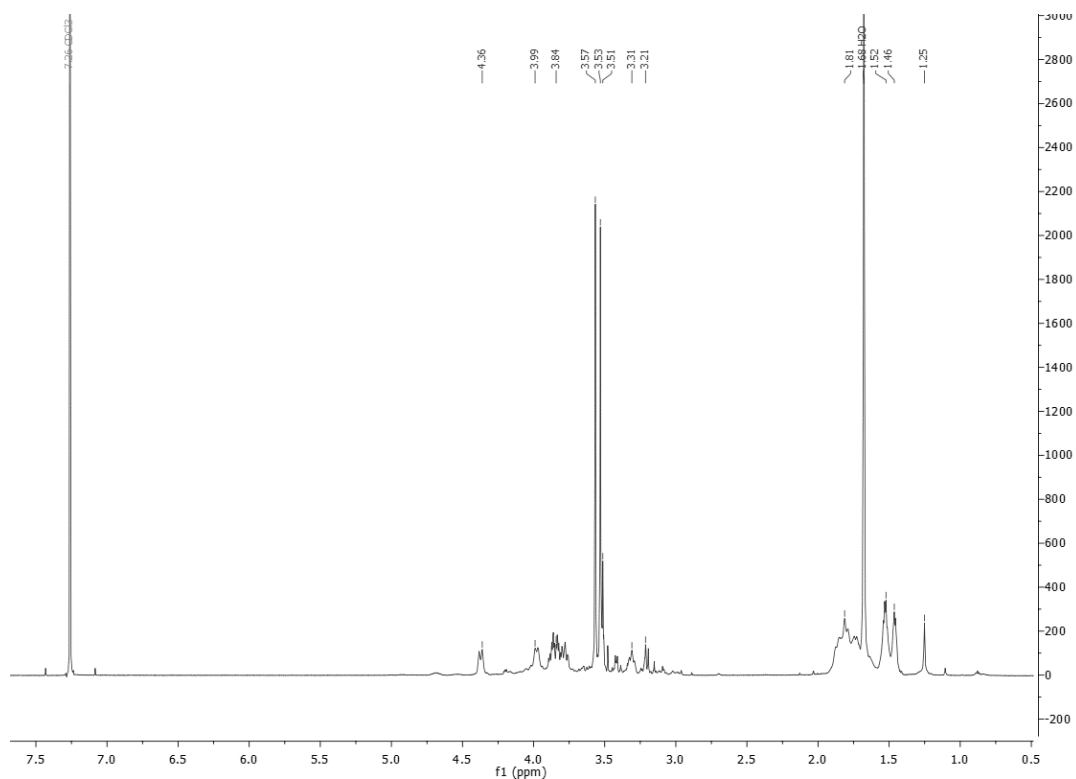

**Figure S12:**  $^1\text{H}$ -NMR spectrum ( $\text{CDCl}_3$ , 599.90 MHz, 298 K) of  $[\text{Ru}_2(\text{pipeDTC})_x(\text{DMDT})_y]\text{Br}$ .

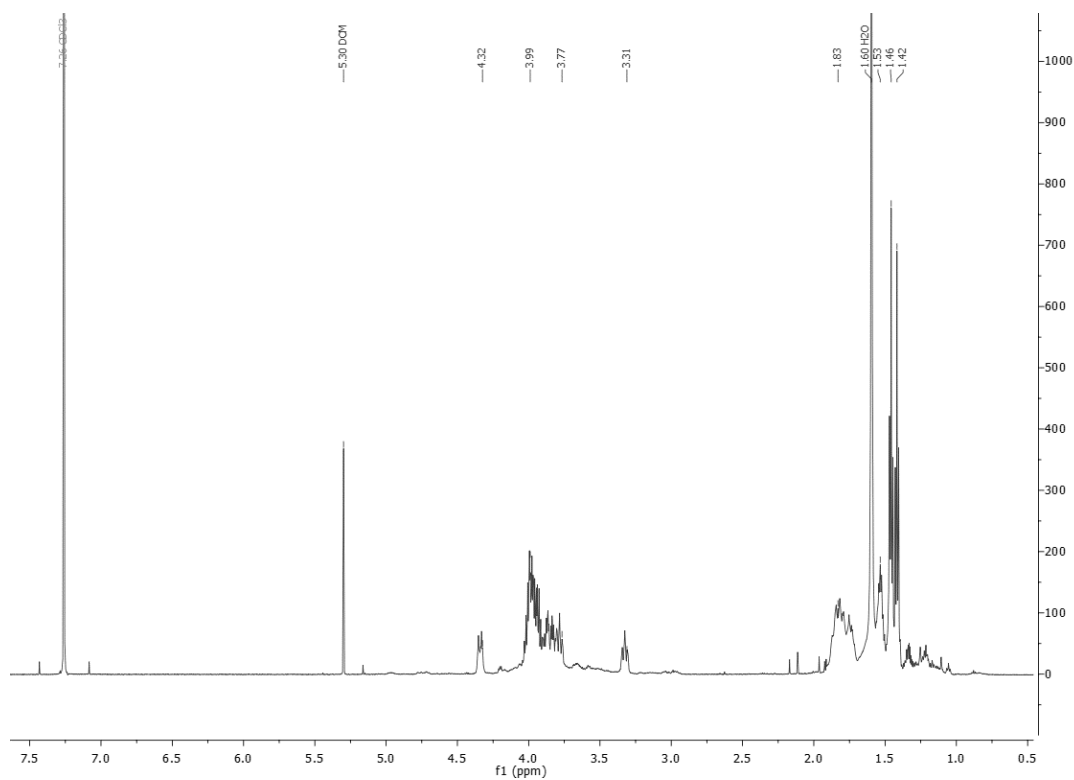

**Figure S13:**  $^1\text{H}$ -NMR spectrum ( $\text{CDCl}_3$ , 599.90 MHz, 298 K) of  $[\text{Ru}_2(\text{pipeDTC})_x(\text{DEDTC})_y]\text{Br}$ .

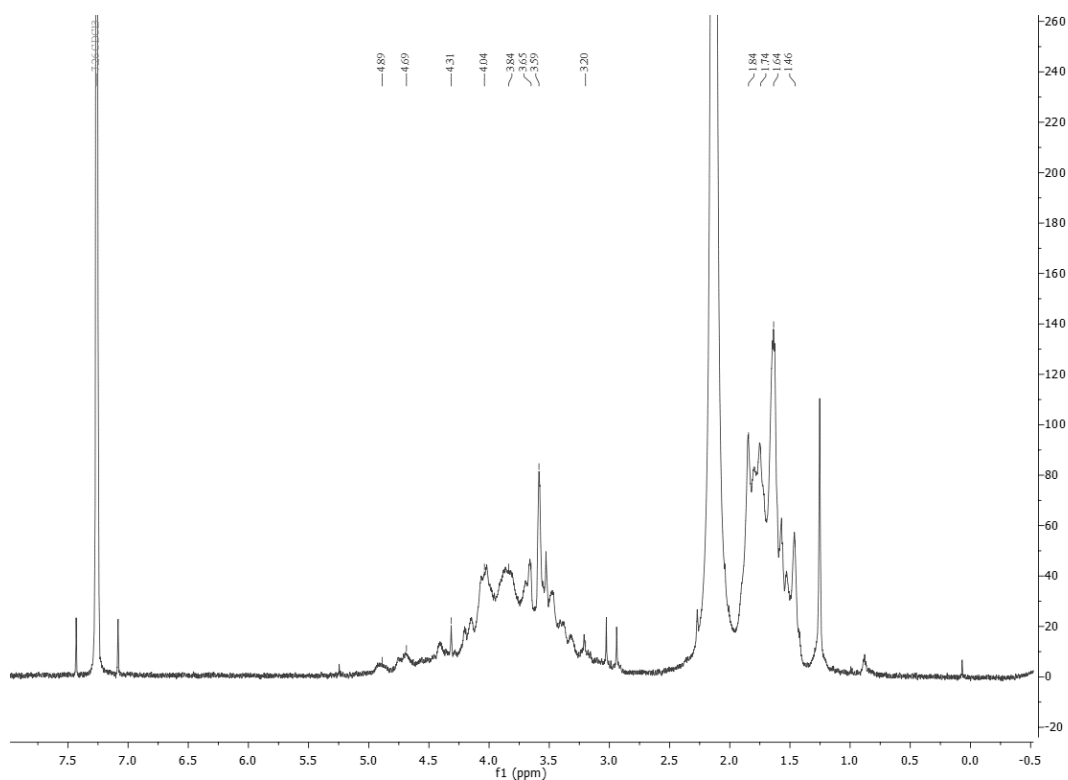

**Figure S14:**  $^1\text{H}$ -NMR spectrum ( $\text{CDCl}_3$ , 599.90 MHz, 298 K) of tetrakis(piperidine dithiocarbamato)-(β-glucoside methyl amino ethyl dithiocarbamato)diruthenium(III) bromide  $[\text{Ru}_2(\text{pipeDTC})_4(\text{gluc-MAE-DTC})]\text{Br}$ .





### FT-IR spectra of the synthesized $[\text{Ru}_2(\text{DTC})_x(\text{DTC}')_{(5-x)}]\text{Br}$ complexes

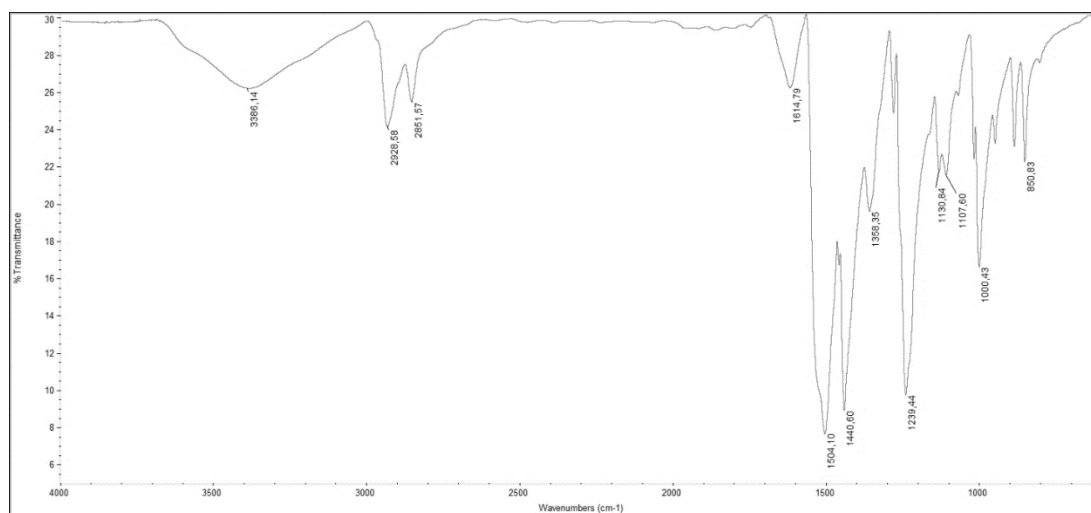

**Figure S15:** Medium FT-IR ( $4000\text{--}600\text{ cm}^{-1}$ , KBr) spectrum of *pentakis*(piperidineDTC) diruthenium(III) bromide,  $[\text{Ru}_2(\text{pipeDTC})_5]\text{Br}$ .

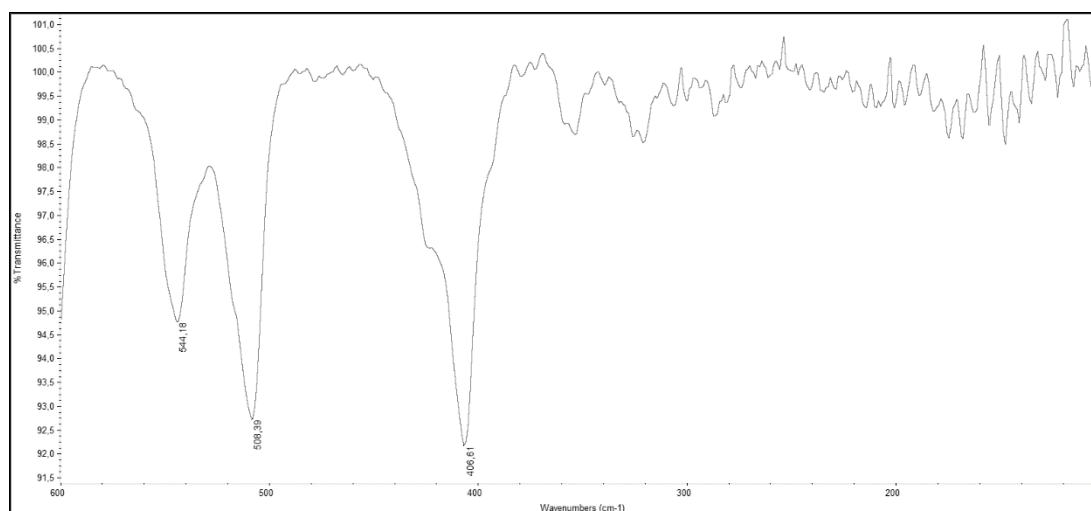

**Figure S16:** Far FT-IR ( $600\text{--}200\text{ cm}^{-1}$ , nujol) spectrum of *pentakis*(piperidine dithiocarbamate)diruthenium(III) bromide,  $[\text{Ru}_2(\text{pipeDTC})_5]\text{Br}$ .

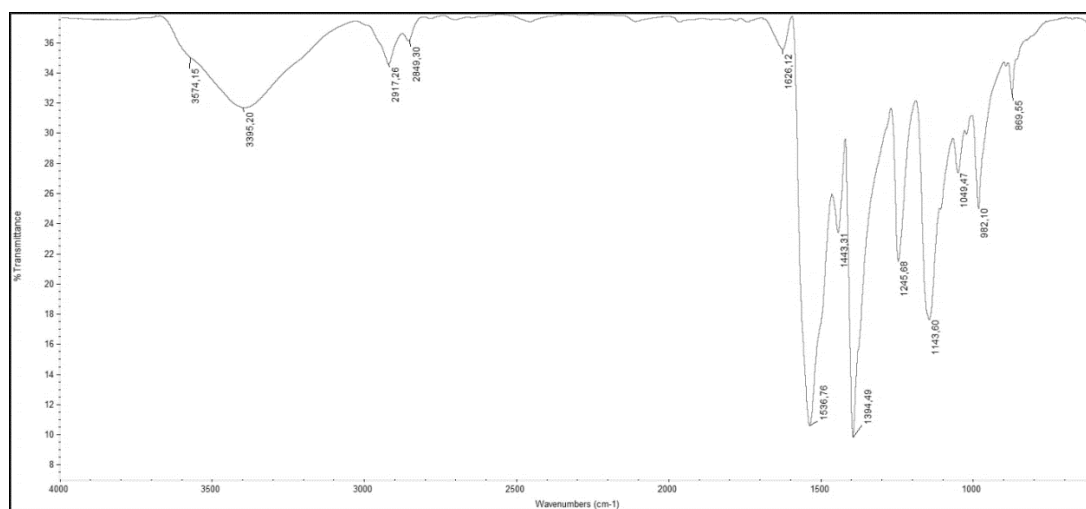

**Figure S17:** Medium FT-IR (4000-600  $\text{cm}^{-1}$ , KBr) spectrum of *pentakis*(dimethyl dithiocarbamate)diruthenium(III) bromide,  $[\text{Ru}_2(\text{DMDT})_5]\text{Br}$ .

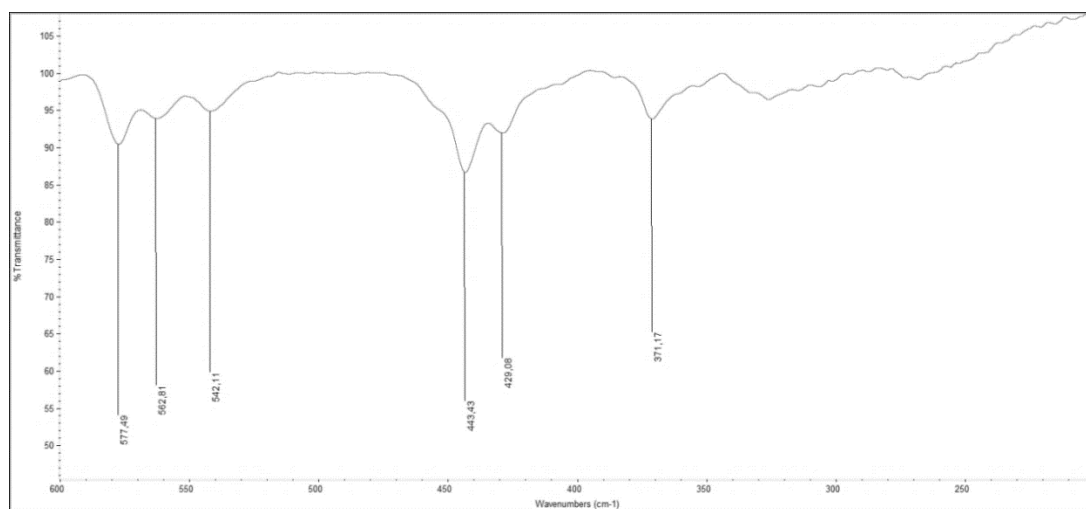

**Figure S18:** Far FT-IR (4000-600  $\text{cm}^{-1}$ , KBr) spectrum of *pentakis*(dimethyl dithiocarbamate)diruthenium(III) bromide,  $[\text{Ru}_2(\text{DMDT})_5]\text{Br}$ .

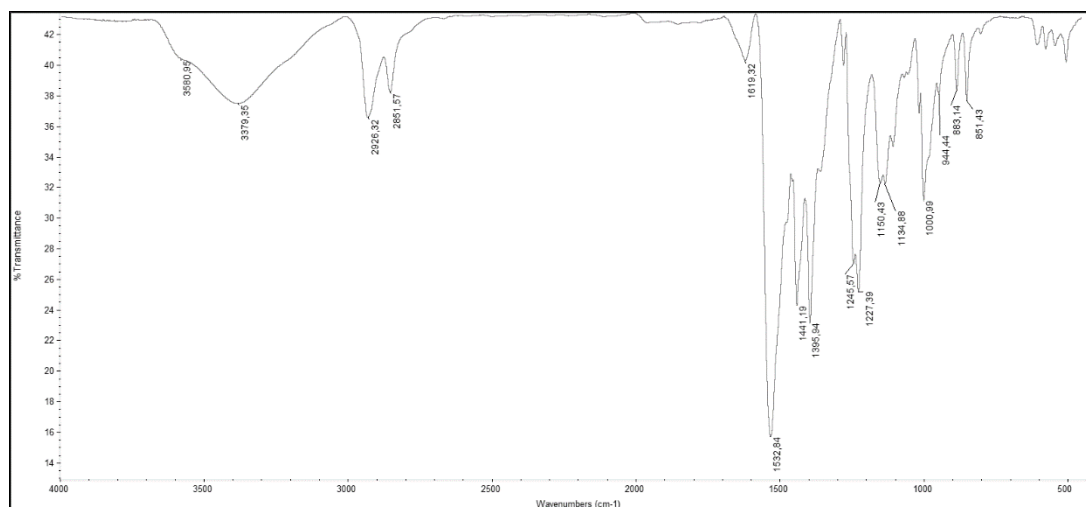

**Figure S19:** Medium FT-IR (4000-600 cm<sup>-1</sup>, KBr) spectrum of [Ru<sub>2</sub>(pipeDTC)<sub>x</sub>(DMDT)<sub>y</sub>]Br.

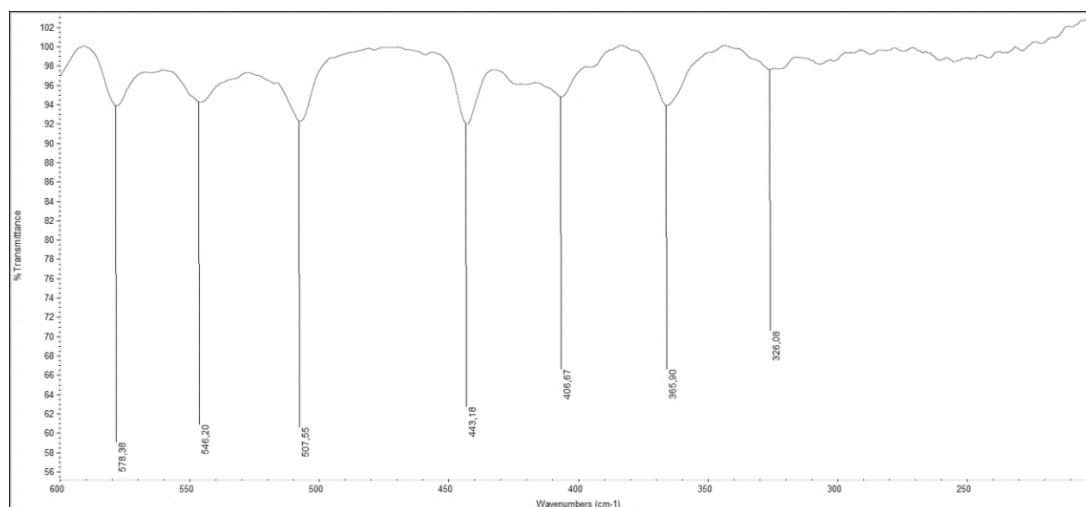

**Figure S20:** Far FT-IR (600-200 cm<sup>-1</sup>, nujol) spectrum of [Ru<sub>2</sub>(pipeDTC)<sub>x</sub>(DMDT)<sub>y</sub>]Br.

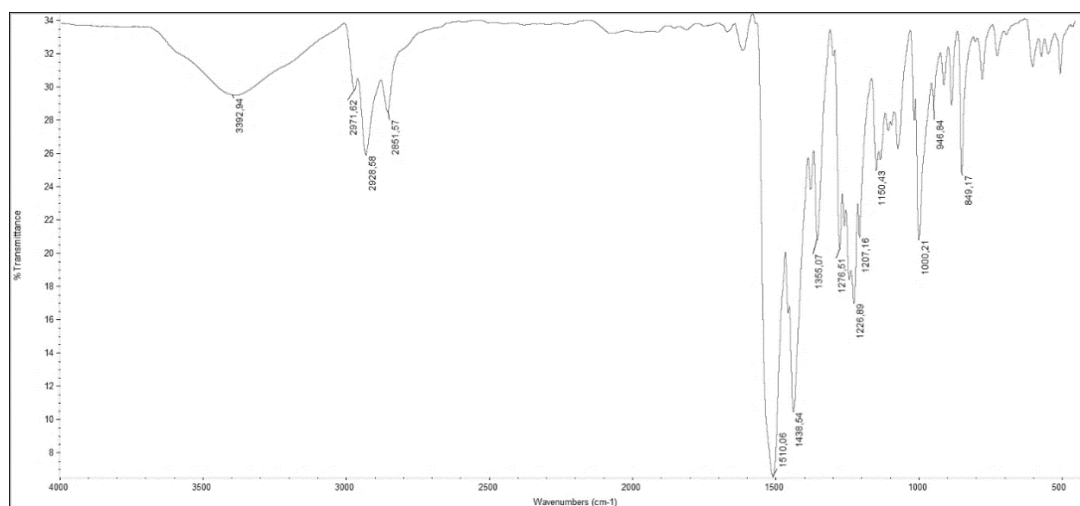

**Figure S21:** Medium FT-IR (4000-600 cm<sup>-1</sup>, KBr) spectrum of [Ru<sub>2</sub>(pipeDTC)<sub>x</sub>(DEDT)<sub>y</sub>]Br.

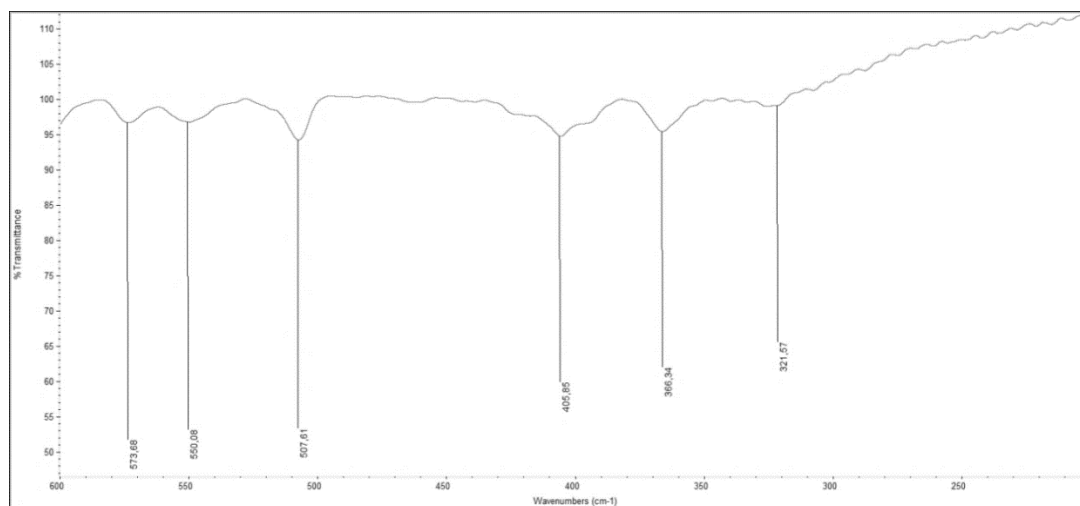

**Figure S22:** Far FT-IR (600-400 cm<sup>-1</sup>, nujol) spectrum of [Ru<sub>2</sub>(pipeDTC)<sub>x</sub>(DEDT)<sub>y</sub>]Br.

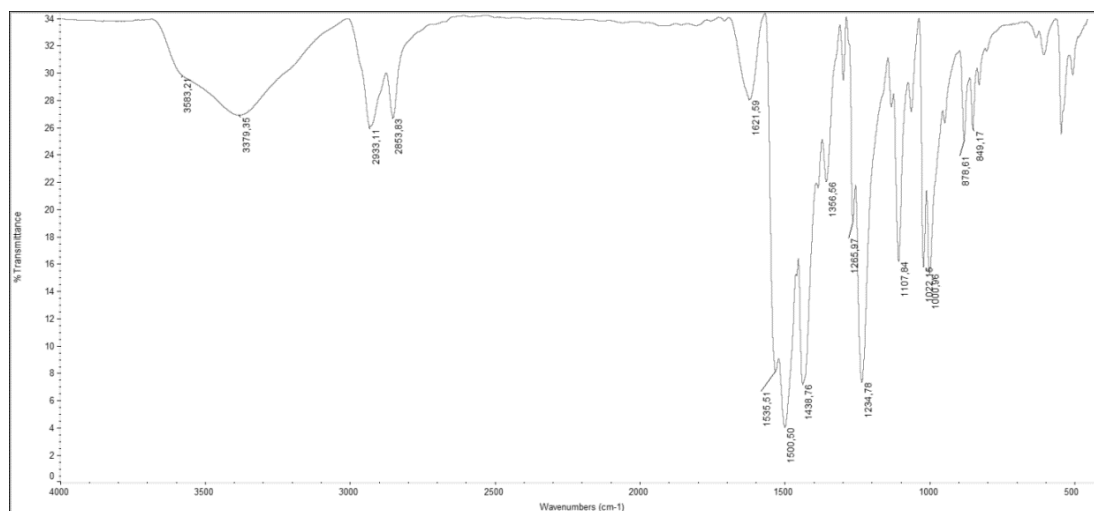

**Figure S23:** Medium FT-IR (4000-600  $\text{cm}^{-1}$ , KBr) spectrum of *tris*(piperidine dithiocarbamate)-*bis*(morpholine dithiocarbamate)*diruthenium*(III) bromide,  $[\text{Ru}_2(\text{pipeDTC})_3(\text{morphDTC})_2]\text{Br}$ .

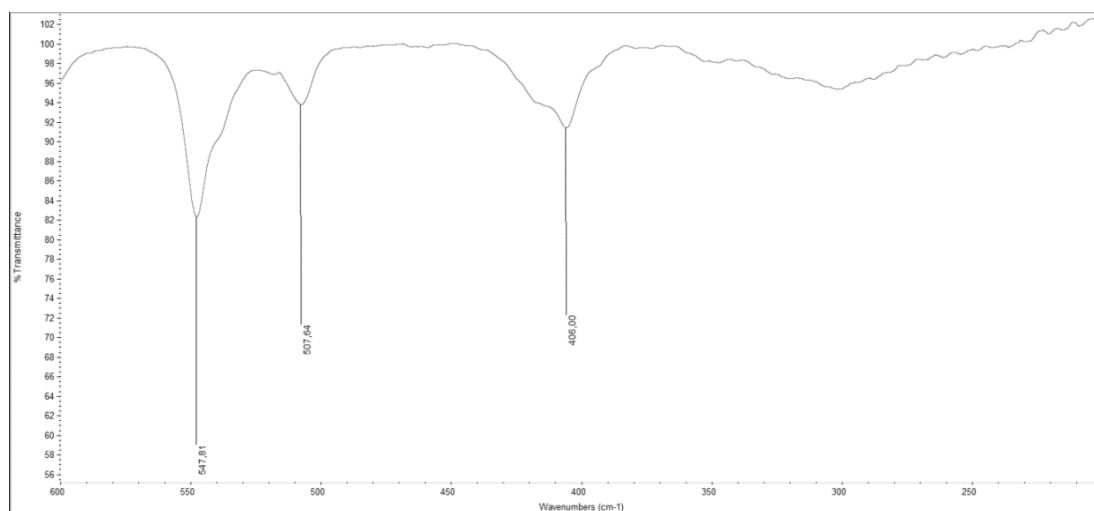

**Figure S24:** Far FT-IR (600-200  $\text{cm}^{-1}$ , nujol) spectrum of *tris*(piperidine dithiocarbamate)-*bis*(morpholine dithiocarbamate)*diruthenium*(III) bromide,  $[\text{Ru}_2(\text{pipeDTC})_3(\text{morphDTC})_2]\text{Br}$ .

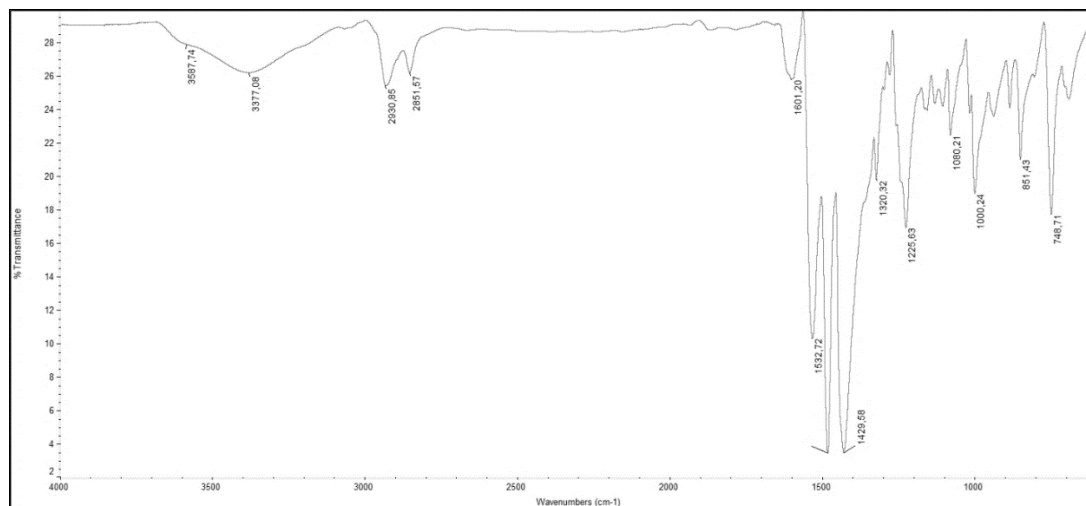

**Figure S25:** Medium FT-IR (4000-600 cm<sup>-1</sup>, KBr) spectrum of [Ru<sub>2</sub>(pipeDTC)<sub>x</sub>(indolineDTC)<sub>y</sub>]Br.

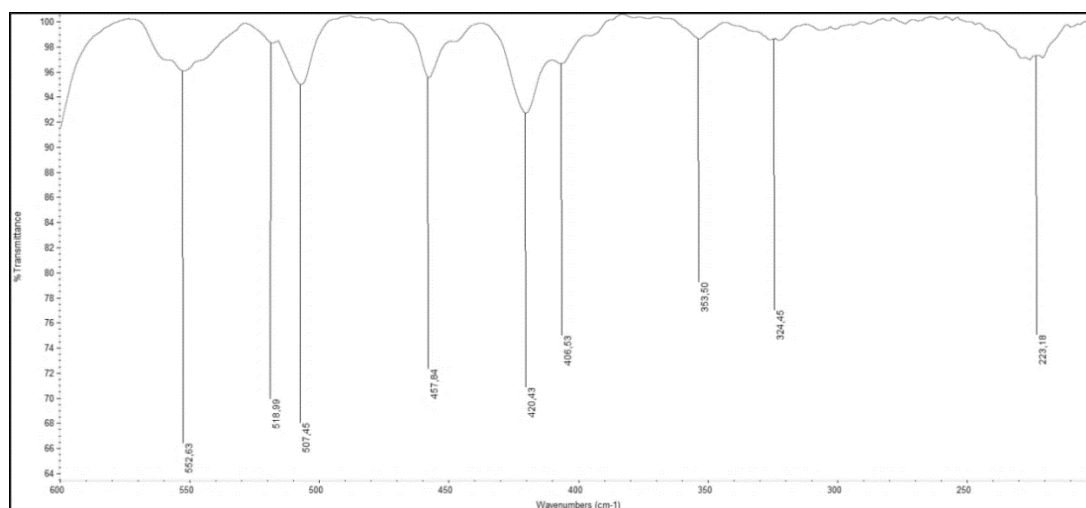

**Figure S26:** Far FT-IR (600-200 cm<sup>-1</sup>, nujol) spectrum of [Ru<sub>2</sub>(pipeDTC)<sub>x</sub>(indolineDTC)<sub>y</sub>]Br.

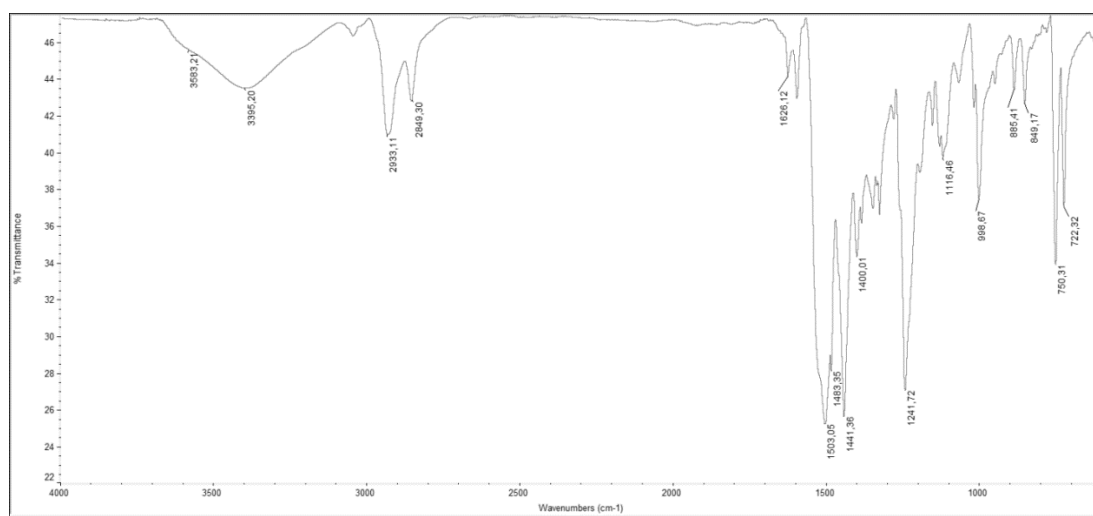

**Figure S27:** Medium FT-IR (4000-600 cm<sup>-1</sup>, KBr) spectrum of [Ru<sub>2</sub>(pipeDTC)<sub>x</sub>(Carbz-pr-NMe-DTC)<sub>y</sub>]Br.

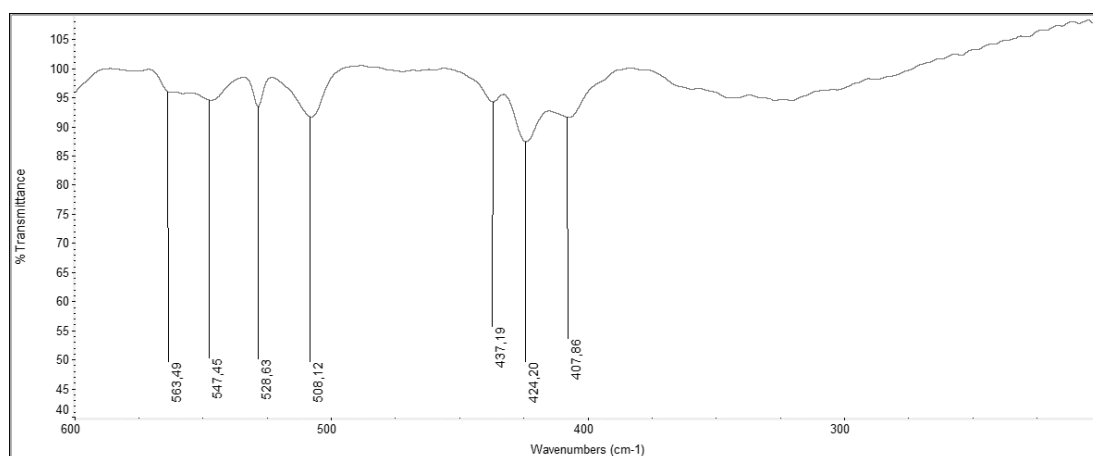

**Figure S28:** Far FT-IR (600-400 cm<sup>-1</sup>, KBr) spectrum of [Ru<sub>2</sub>(pipeDTC)<sub>x</sub>(Carbz-pr-NMe-DTC)<sub>y</sub>]Br.



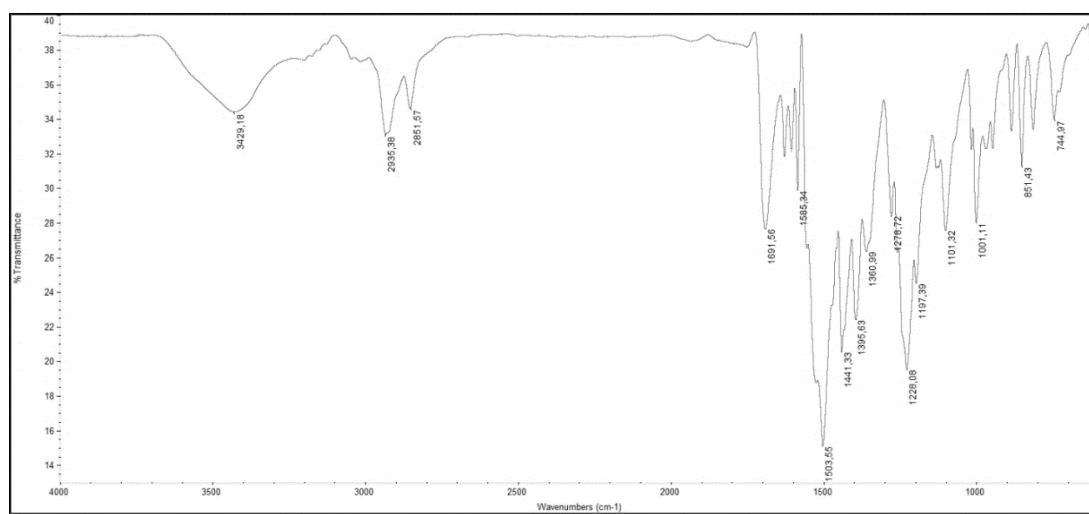

**Figure S29:** Medium FT-IR (4000-600 cm<sup>-1</sup>, KBr) spectrum of [Ru<sub>2</sub>(pipeDTC)<sub>x</sub>(β-Napht-Sar-DTC)<sub>y</sub>]Br.

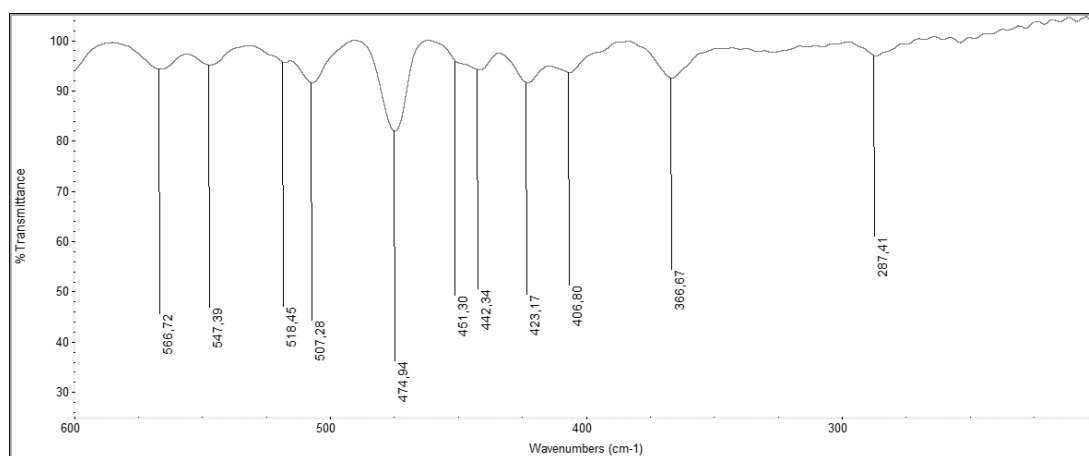

**Figure S30:** Far FT-IR (600-200 cm<sup>-1</sup>, nujol) spectrum of [Ru<sub>2</sub>(pipeDTC)<sub>x</sub>(β-Napht-Sar-DTC)<sub>y</sub>]Br.

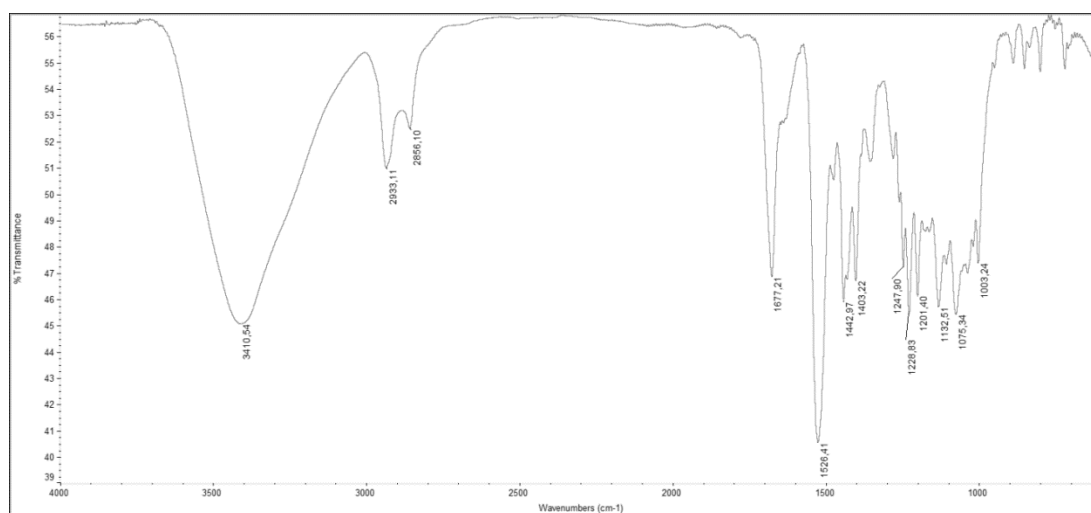

**Figure S31:** Medium FT-IR (4000-600  $\text{cm}^{-1}$ , KBr) spectrum of *tris*-(piperidine dithiocarbamate) *bis*-(glucMAEdithiocarbamate)*diruthenium*(III) bromide,  $[\text{Ru}_2(\text{pipeDTC})_3(\text{glucMAE-DTC})_2]\text{Br}$ .

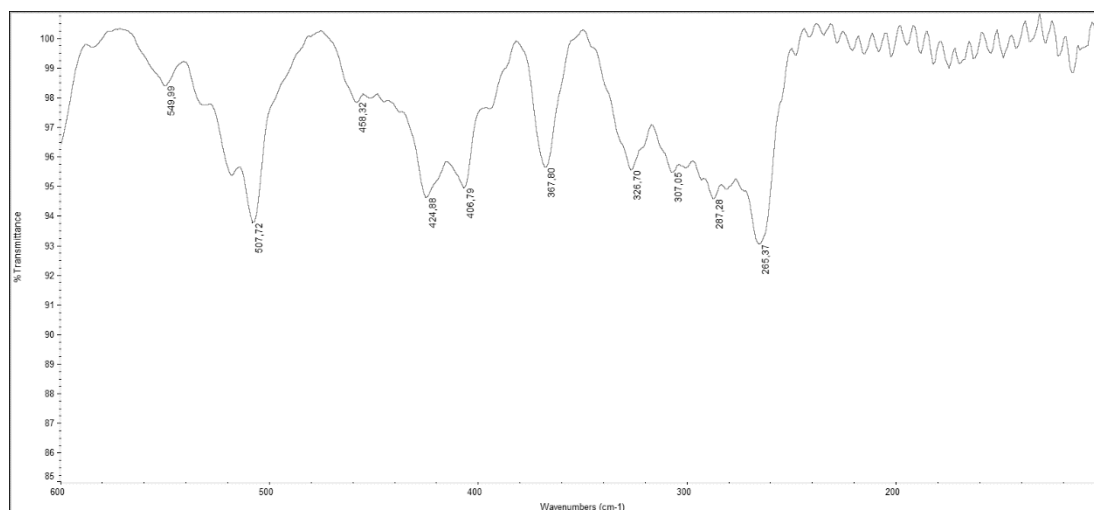

**Figure S32.** Far FT-IR (600-200  $\text{cm}^{-1}$ , KBr) spectrum of *tris*-(piperidine dithiocarbamate) *bis*-(glucMAEdithiocarbamate)*diruthenium*(III) bromide,  $[\text{Ru}_2(\text{pipeDTC})_3(\text{glucMAE-DTC})_2]\text{Br}$ .

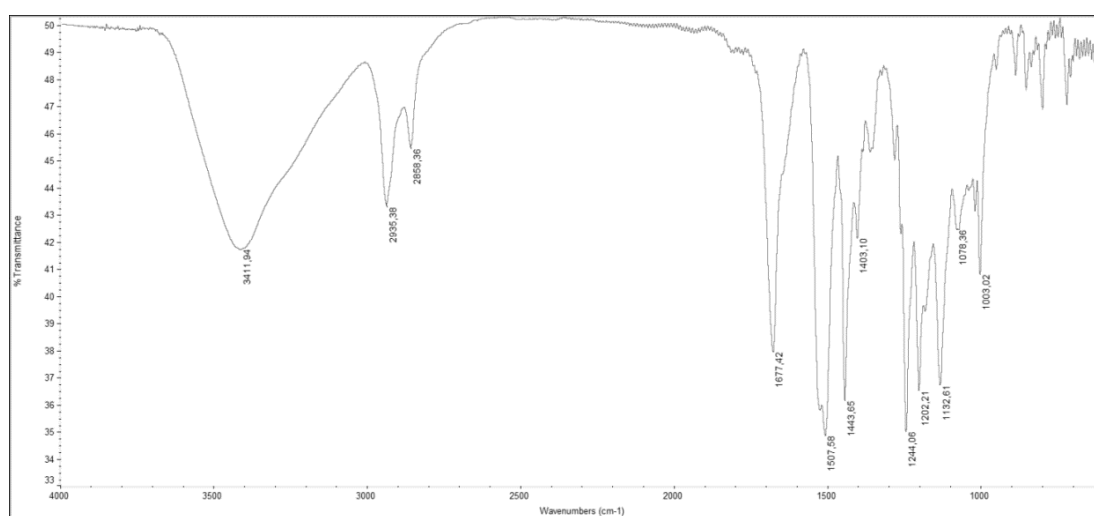

**Figure S33:** Medium FT-IR (4000-600  $\text{cm}^{-1}$ , KBr) spectrum of *tetrakis*-(piperidine dithiocarbamate)glucMAEdithiocarbamate)*diruthenium*(III) bromide,  $[\text{Ru}_2(\text{pipeDTC})_4(\text{glucMAE-DTC})]\text{Br}$ .

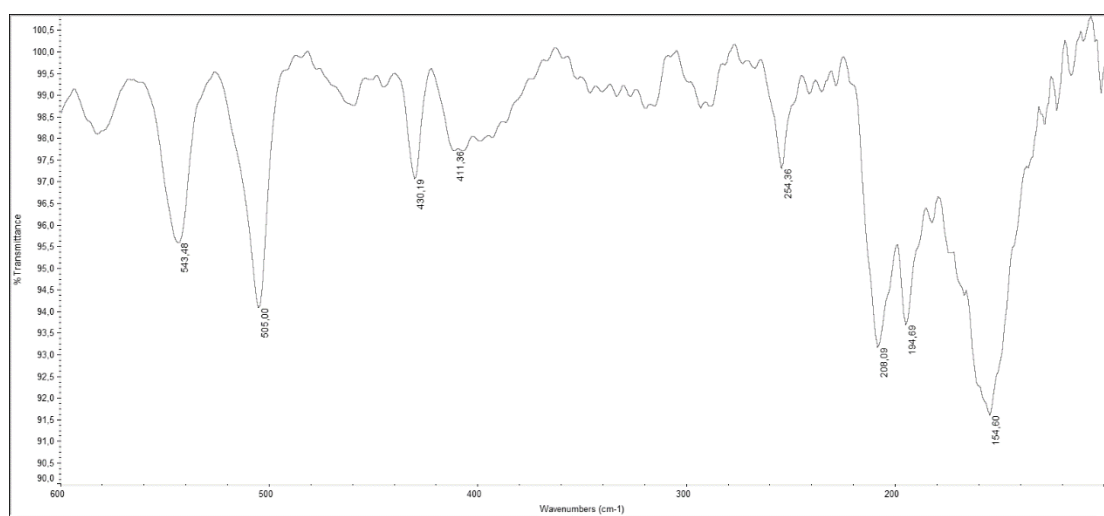

Far FT-

**Figure S34:** IR (600-200 cm<sup>-1</sup>, KBr) spectrum of the oxidized of the bimetallic oxidized precursor.

### UV-Vis spectra of the synthesized $[\text{Ru}_2(\text{DTC})_x(\text{DTC}')_{(5-x)}]\text{Br}$ complexes

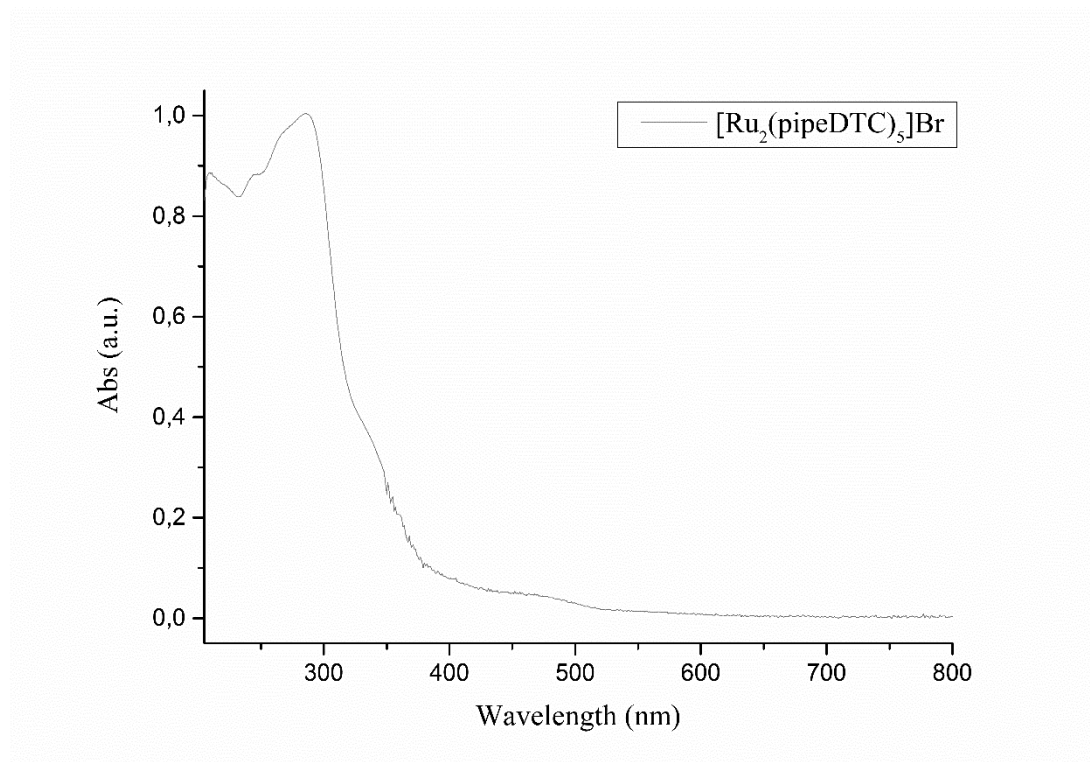

**Figure S35:** UV-Vis spectrum of  $[\text{Ru}_2(\text{pipeDTC})_5]\text{Br}$  recorded in MeOH (800-205 nm).

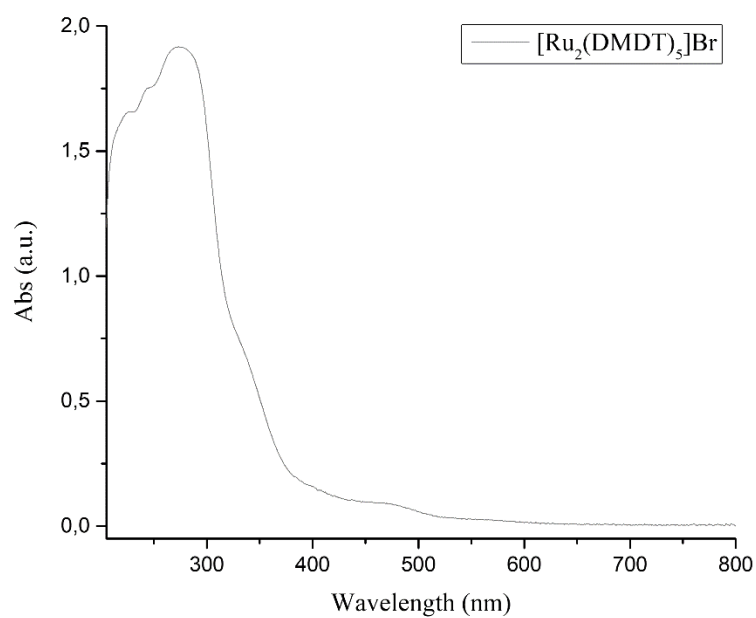

**Figure S36:** UV-Vis spectrum of  $[\text{Ru}_2(\text{DMDT})_5]\text{Br}$  recorded in MeOH (800-205 nm).

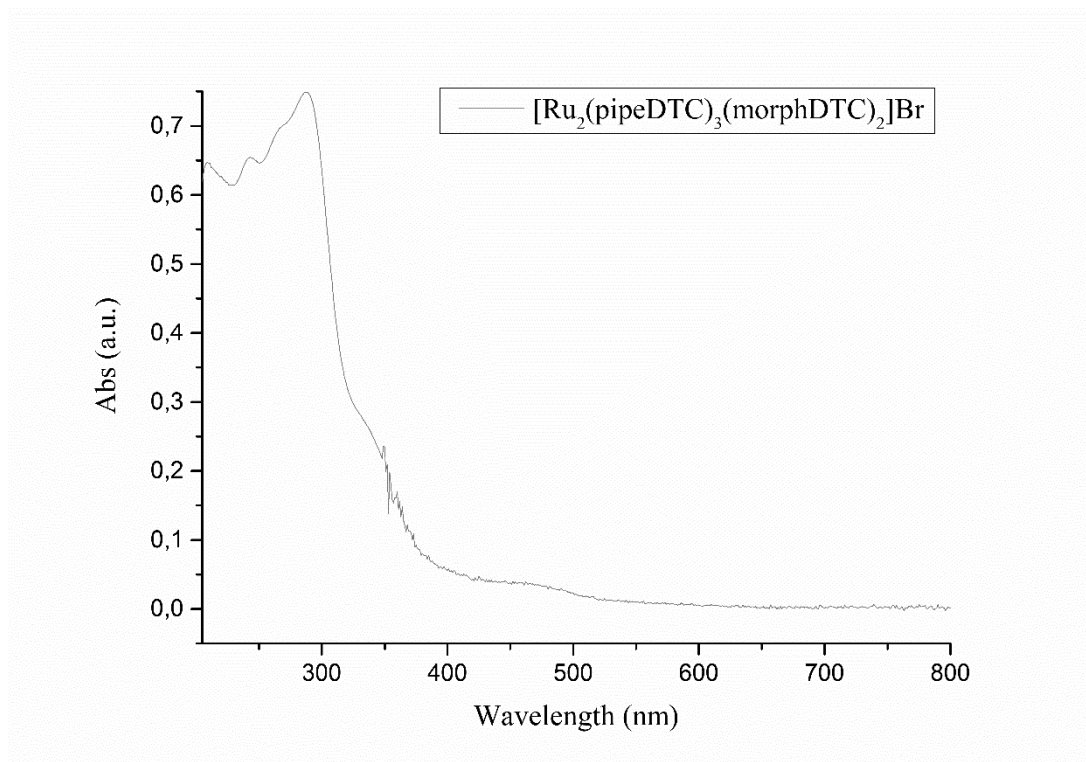

**Figure S37:** UV-Vis spectrum of  $[\text{Ru}_2(\text{pipeDTC})_3(\text{morphDTC})_2]\text{Br}$  recorded in MeOH (800-205 nm).

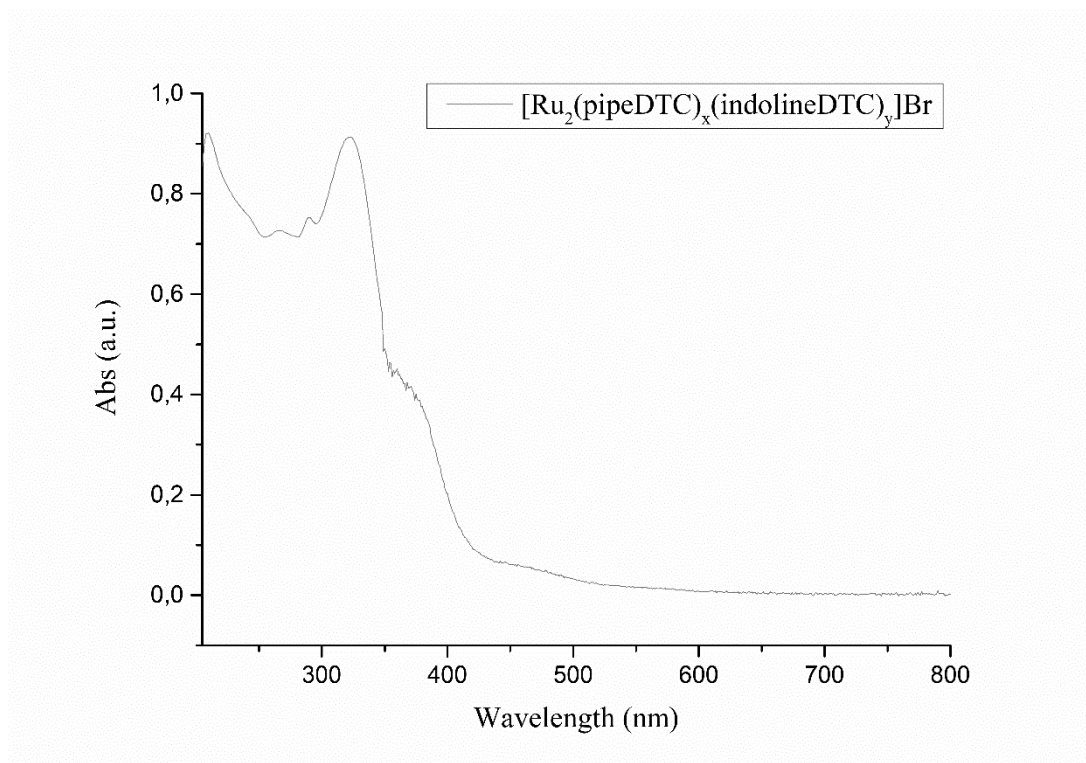

**Figure S38:** UV-Vis spectrum of  $[\text{Ru}_2(\text{pipeDTC})_x(\text{indolineDTC})_y]\text{Br}$  recorded in MeOH (800-205 nm).

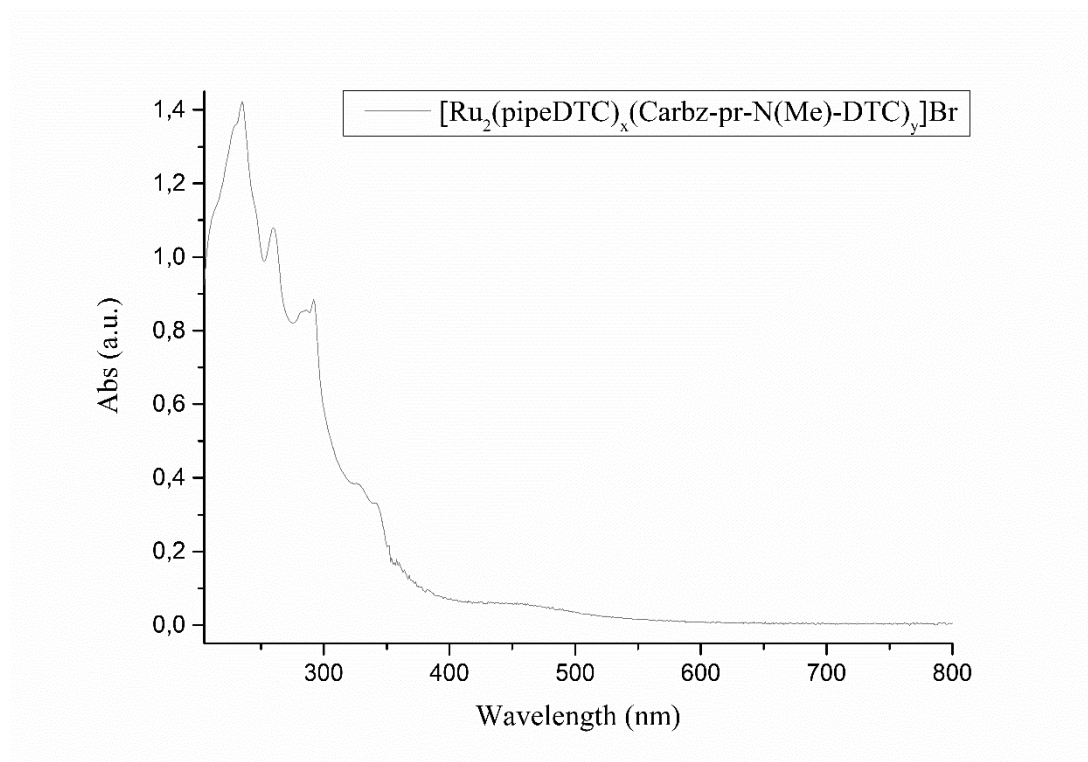

**Figure S39:** UV-Vis spectrum of  $[\text{Ru}_2(\text{pipeDTC})_x(\text{Carbz-pr-N}(\text{Me})\text{-DTC})_y]\text{Br}$  recorded in MeOH (800-205 nm).

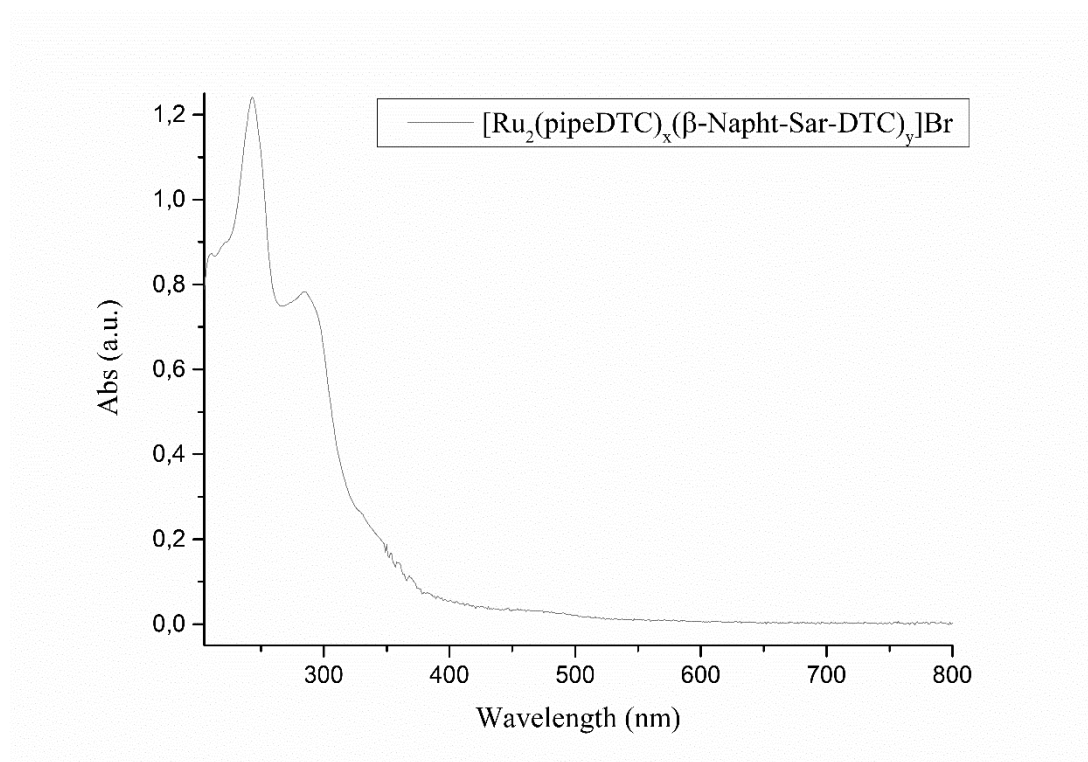

**Figure S40:** UV-Vis spectrum of  $[\text{Ru}_2(\text{pipeDTC})_x(\beta\text{-Napht-Sar-DTC})_y]\text{Br}$  recorded in MeOH (800-205 nm).

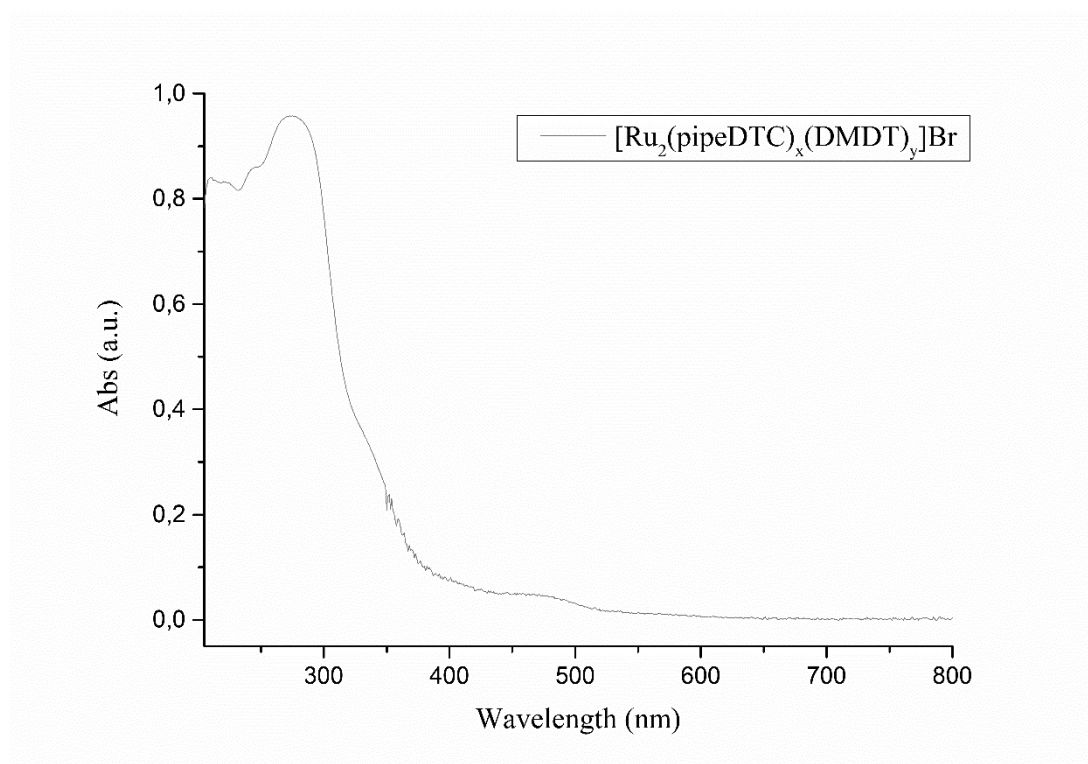

**Figure S41:** UV-Vis spectrum of  $[\text{Ru}_2(\text{pipeDTC})_x(\text{DMDT})_y]\text{Br}$  recorded in MeOH (800-205 nm).

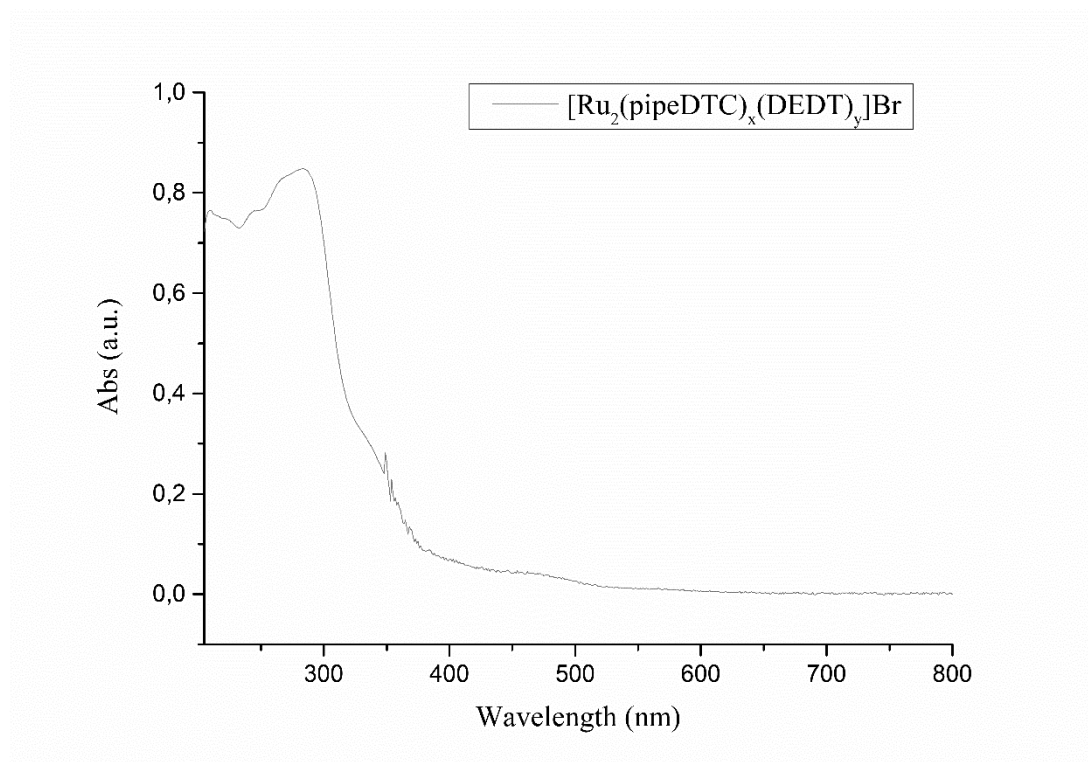

**Figure S42:** UV-Vis spectrum of  $[\text{Ru}_2(\text{pipeDTC})_x(\text{DEDT})_y]\text{Br}$  recorded in MeOH (800-205 nm).



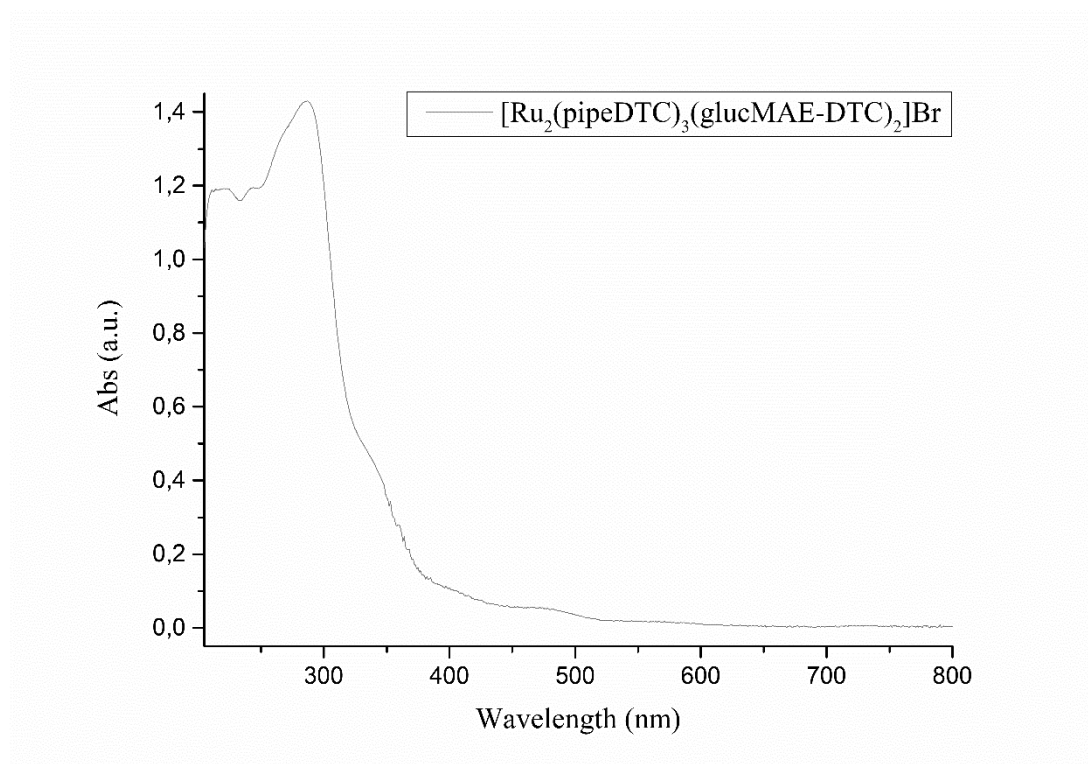

**Figure S43:** UV-Vis spectrum of  $[\text{Ru}_2(\text{pipeDTC})_3(\text{glucMAE-DTC})_2]\text{Br}$  recorded in MeOH (800-205 nm).

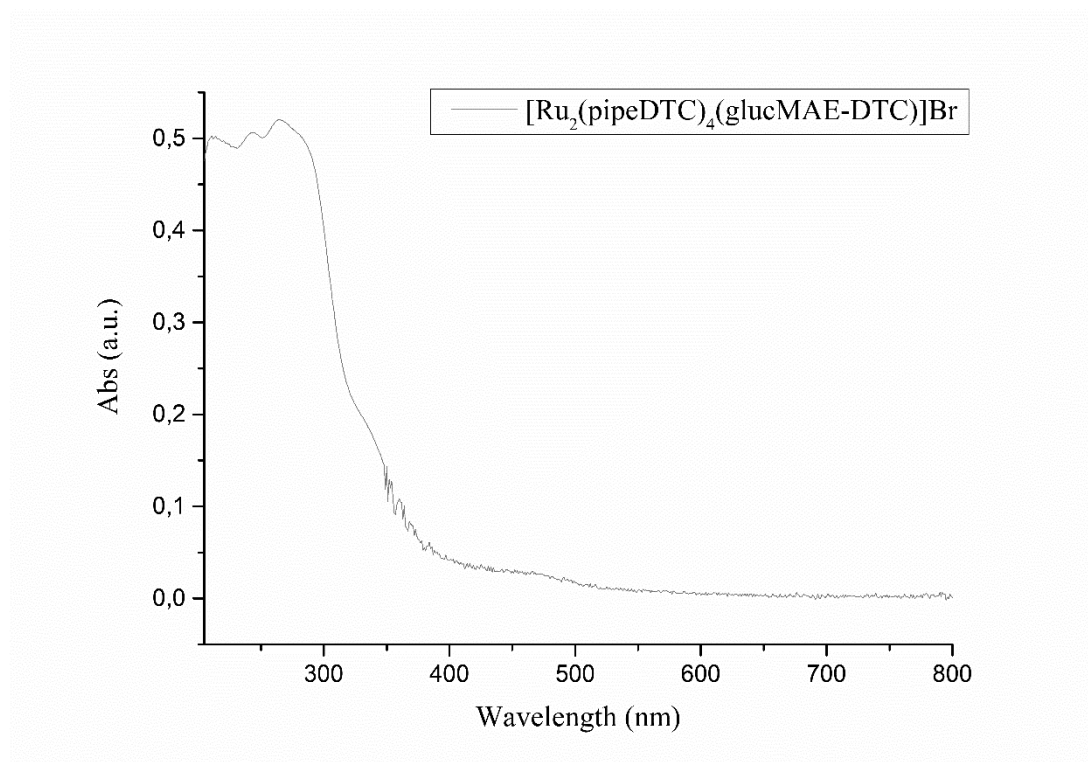

**Figure S44:** UV-Vis spectrum of  $[\text{Ru}_2(\text{pipeDTC})_4(\text{glucMAE-DTC})]\text{Br}$  recorded in MeOH (800-205 nm).

## **Antiproliferative activity**

MDA-MB-231 and PC3 cells were separately cultured in 75 cm<sup>2</sup> cell culture flasks in complete medium (DMEM high glucose), with addition of FBS (10%), L-glutamine (4 mM), and incubated at 37 °C in a 5% carbon dioxide-controlled atmosphere.

This was followed by treatment for 24 and 48 hours with vehicle (control; namely DMSO) or each compound (dissolved in the vehicle) in fresh medium at the defined concentrations. Compounds were weighed in sterile test tubes of 1 ml and pre-dissolved in DMSO. The final concentrations of the tested compounds were 0.05, 0.1, 1.5 and 10 µM.

### *Cell count with Trypan Blue exclusion test*

24 and 48 hours after treatment with each compound, the medium was removed from the flask, and the cells washed with 6 mL of PBS, and then shocked in presence of 1 mL of trypsin, followed by 3-min incubation. MEM was then added, and the obtained cellular suspension seeded in 96-well microplates (10<sup>4</sup> cells/well) in the proper growth medium (200 µL), and incubated at 37 °C in a 5% CO<sub>2</sub> atmosphere for 24 h to allow cell adhesion. This was followed by treatment for 24 and 48 hours with vehicle (control; namely DMSO) or each compound (dissolved in the vehicle) in fresh medium at the defined concentrations (i.e., 10 µM, 5 µM, 2 µM, 1 µM, 0.5 µM).

Cells were counted with a Burker cell-counting chamber using the Trypan blue. This dye selectively stains dead cells. The values resulting from the cell counts of both cell lines (in triplicate). From the analysis of the test results, it was calculated the value of the concentration at which the test substance, compared to the untreated control, can reduce the population of viable cells by 50% (IC<sub>50</sub>).

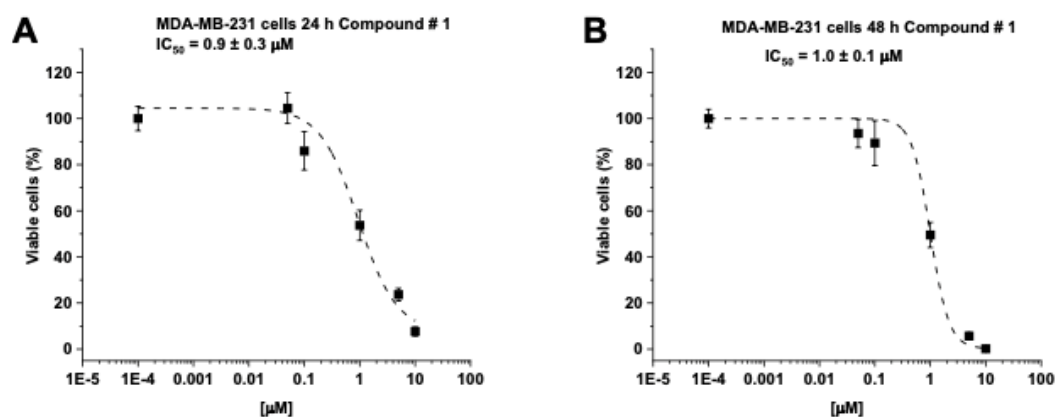

**Figure S46:** IC<sub>50</sub> determination for the treatment with compound #1 of MDA-MB-231 for 24 (A) and 48 (B) hours

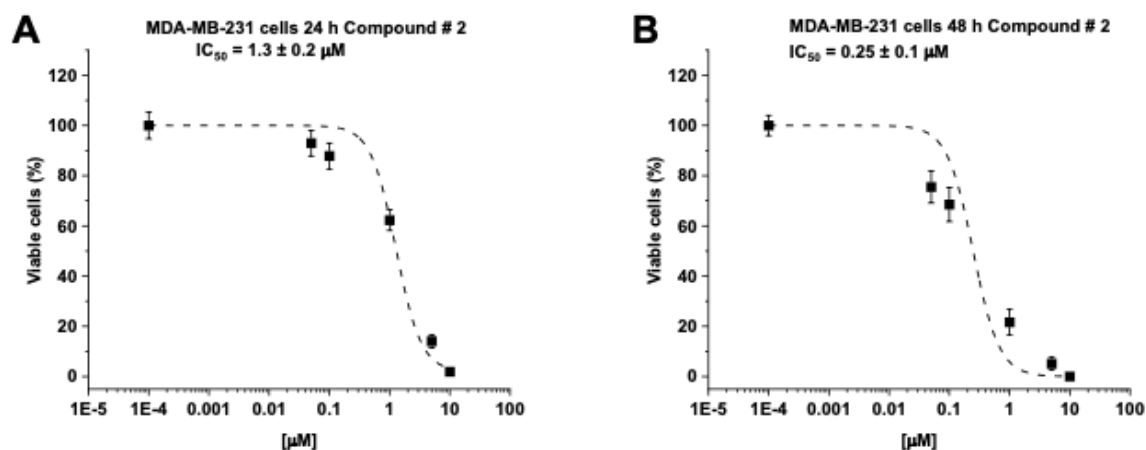

**Figure S47:** IC<sub>50</sub> determination for the treatment with compound #2 of MDA-MB-231 for 24 (A) and 48 (B) hours

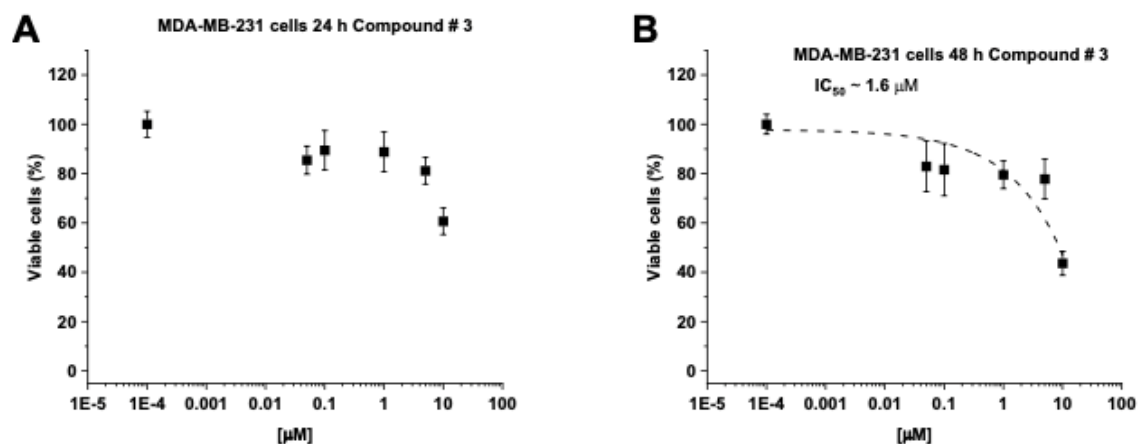

**Figure S48:** IC<sub>50</sub> determination for the treatment with compound #3 of MDA-MB-231 for 24 (A) and 48 (B) hours

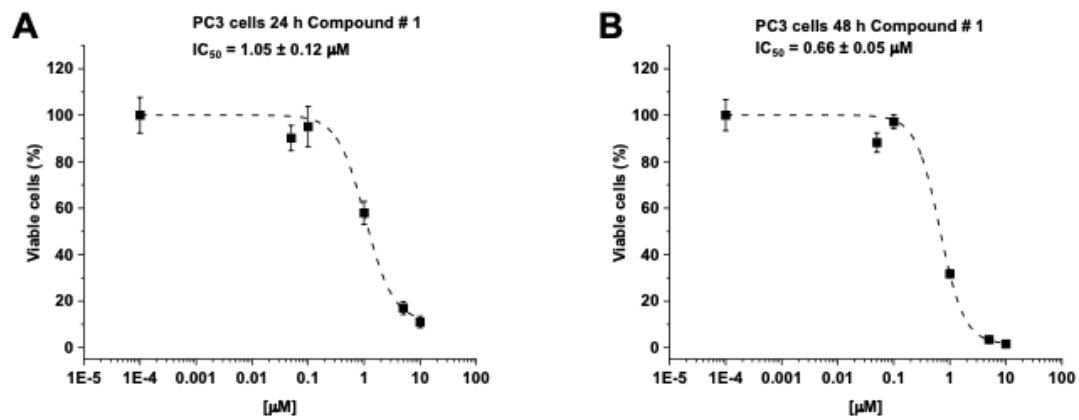

**Figure S49:** IC<sub>50</sub> determination for the treatment with compound #1 of PC3 for 24 (A) and 48 (B) hours

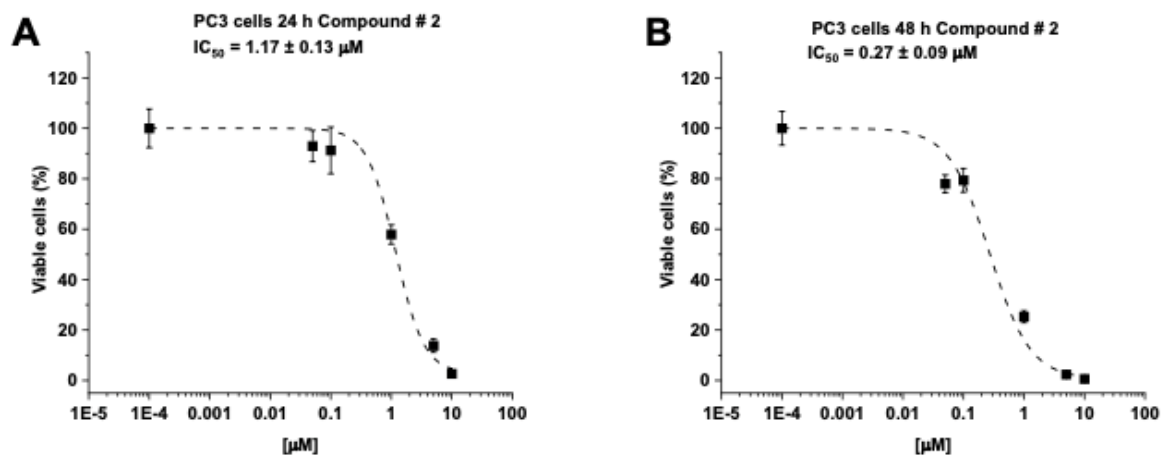

**Figure S50:** IC<sub>50</sub> determination for the treatment with compound #2 of PC3 for 24 (A) and 48 (B) hours

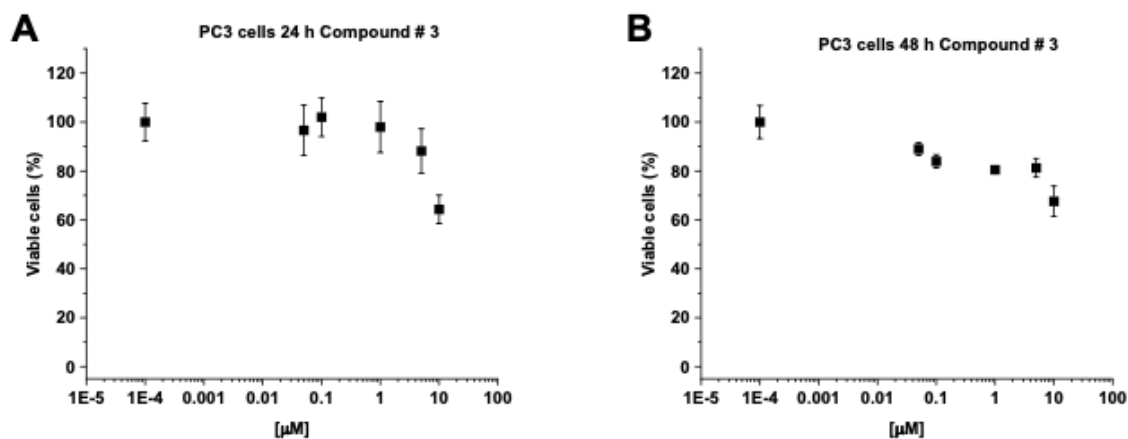

**Figure S51:** IC<sub>50</sub> determination for the treatment with compound #3 of PC3 for 24 (A) and 48 (B) hours

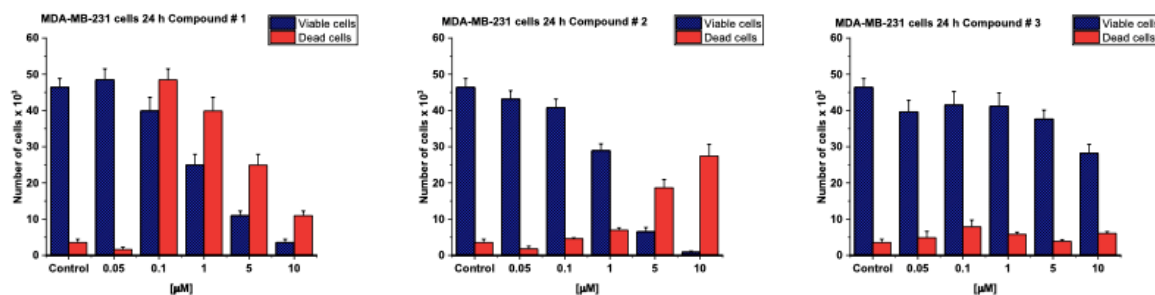

**Figure S52:** Bar charts reporting viable and dead MDA-MB-231 cells 24 hours post-treatment with compound #1, #2, and #3 respectively.

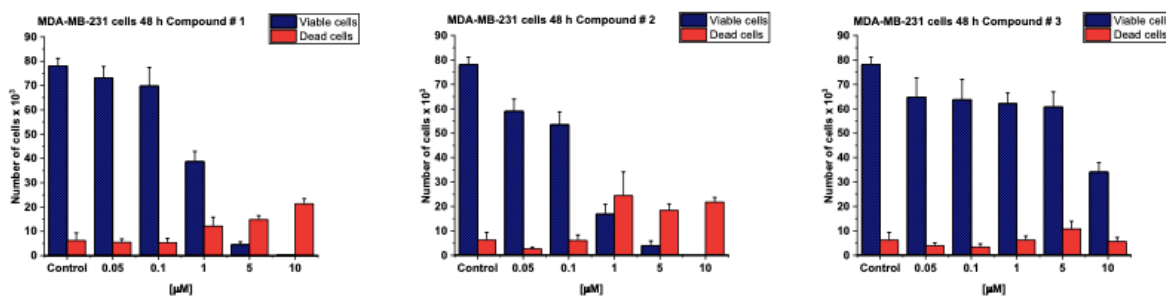

**Figure S53:** Bar charts reporting viable and dead MDA-MB-231 cells 48 hours post-treatment with compound #1, #2, and #3 respectively.

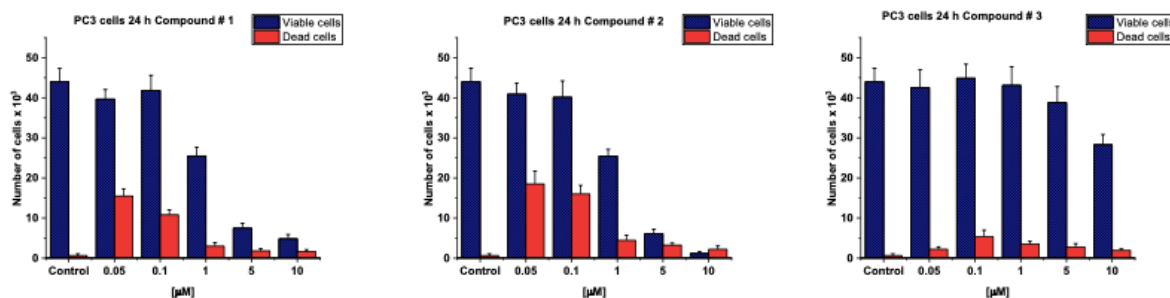

**Figure S54:** Bar charts reporting viable and dead PC3 cells 24 hours post-treatment with compound #1, #2, and #3 respectively.

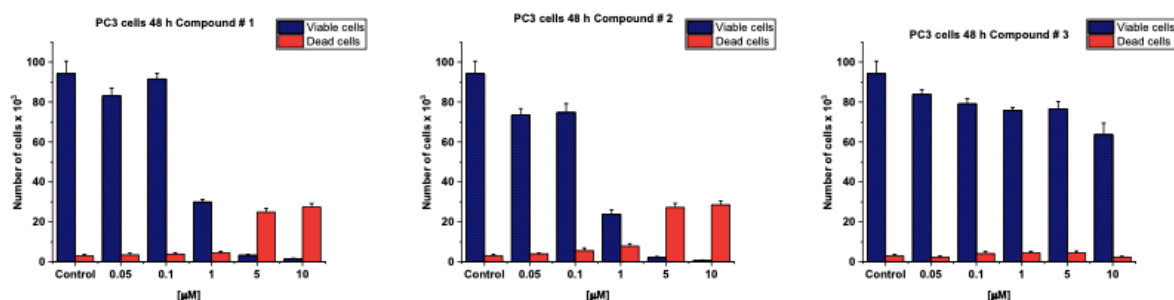

**Figure S55:** Bar charts reporting viable and dead PC3 cells 48 hours post-treatment with compound #1, #2, and #3 respectively.

### *Evaluation of cell viability by the WST-1 assay.*

To evaluate the vitality and the cell proliferation the cell proliferation assay called WST-1 was also used or 4- [3- (4-iodophenyl) -2- (4-nitrophenyl) -2H-5-tetrazolium] -1,3-benzene disulfonate (Roche Diagnostics, Mannheim, Germany). This is a colorimetric assay for quantification spectrophotometric of cell proliferation, viability and cytotoxicity, carried out in a 96-well plate. At the time of determination, the cells were incubated with the WST-1 reagent, ready for use, for 0.5-3 hours, in a humidified atmosphere (37 ° C, 5% CO<sub>2</sub>). During that period of incubation, the formazan dye was quantified with a multi-well spectrophotometer (ELISA reader), using a wavelength of 450 nm. The absorbance measure directly correlates with the number of viable cells. The absorbance of the complete medium only (white) was subtracted from the absorbance measured in the samples.

From the analysis of the test it was calculated the value of the concentration at which the substance in examination, compared to the untreated control, reduces the proliferation of cell populations by 50% (IC<sub>50</sub>).

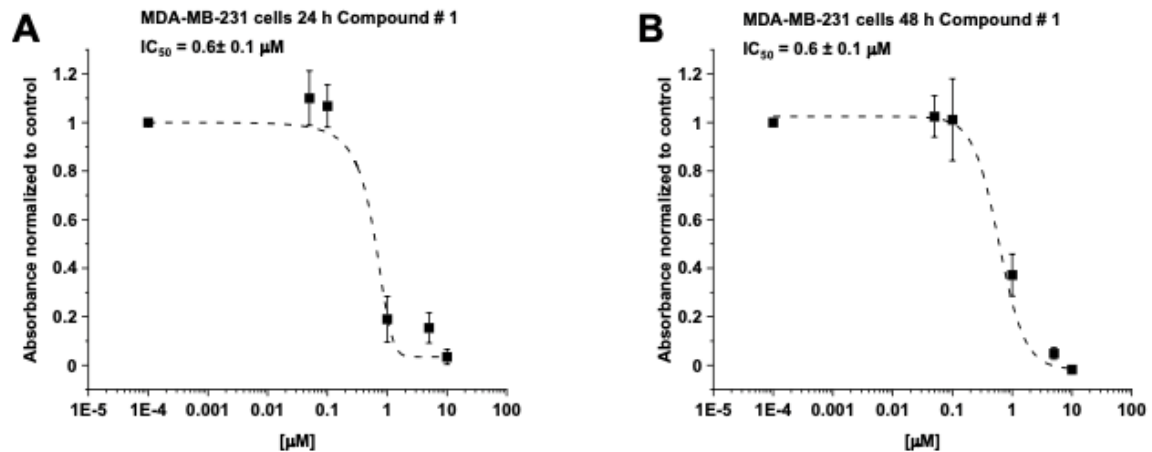

**Figure S56:** IC<sub>50</sub> determination for the treatment with compound #1 of MDA-MB-231 for 24 (A) and 48 (B) hours.

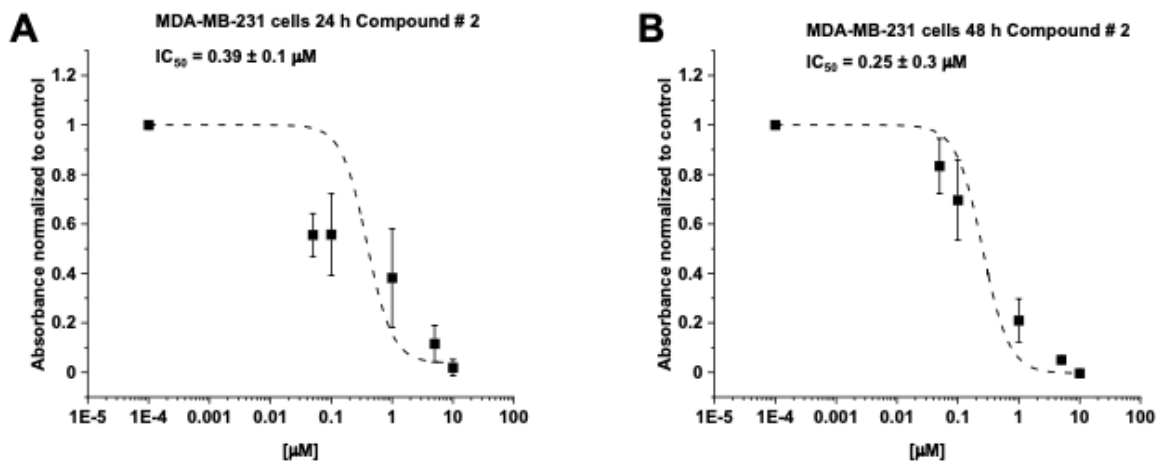

**Figure S57:** IC<sub>50</sub> determination for the treatment with compound #2 of MDA-MB-231 for 24 (A) and 48 (B) hours.

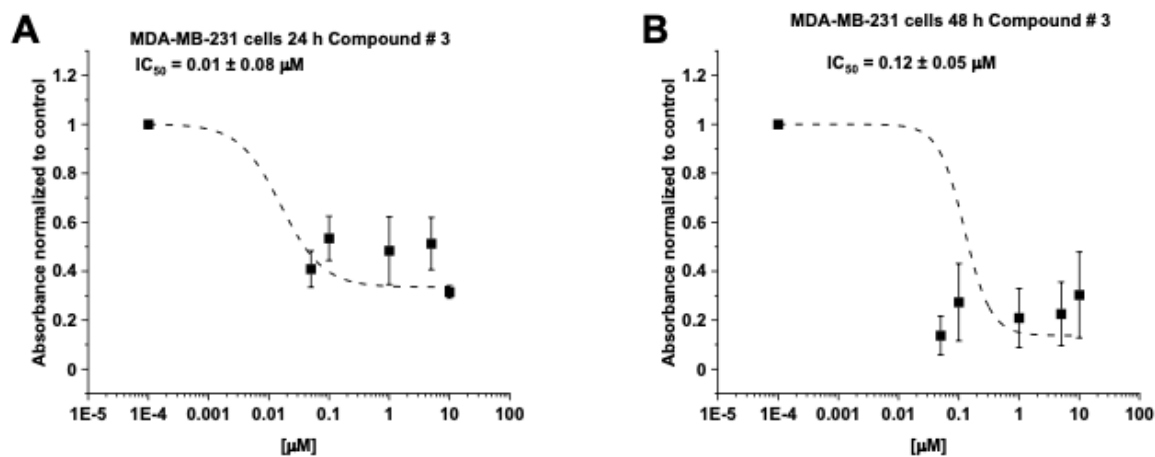

**Figure S58:** IC<sub>50</sub> determination for the treatment with compound #3 of MDA-MB-231 for 24 (A) and 48 (B) hours.

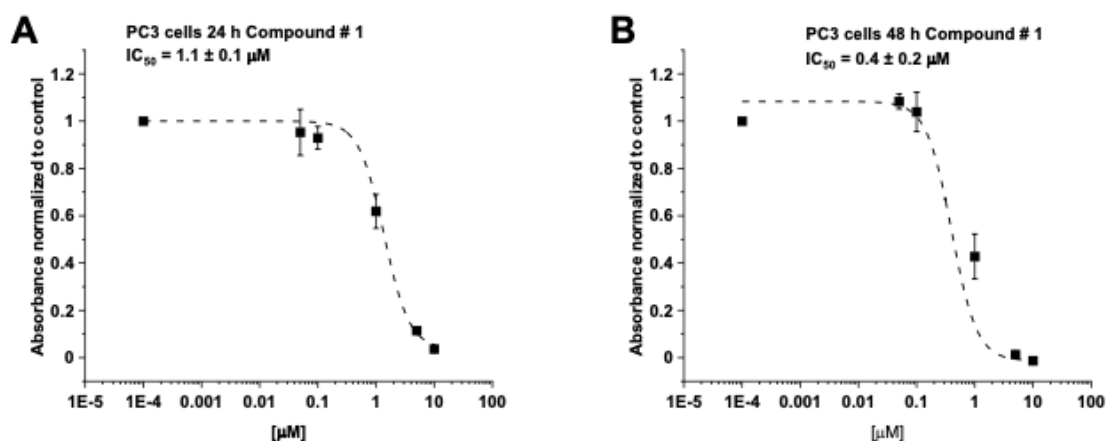

**Figure S59:** IC<sub>50</sub> determination for the treatment with compound #1 of PC3 for 24 (A) and 48 (B) hours.

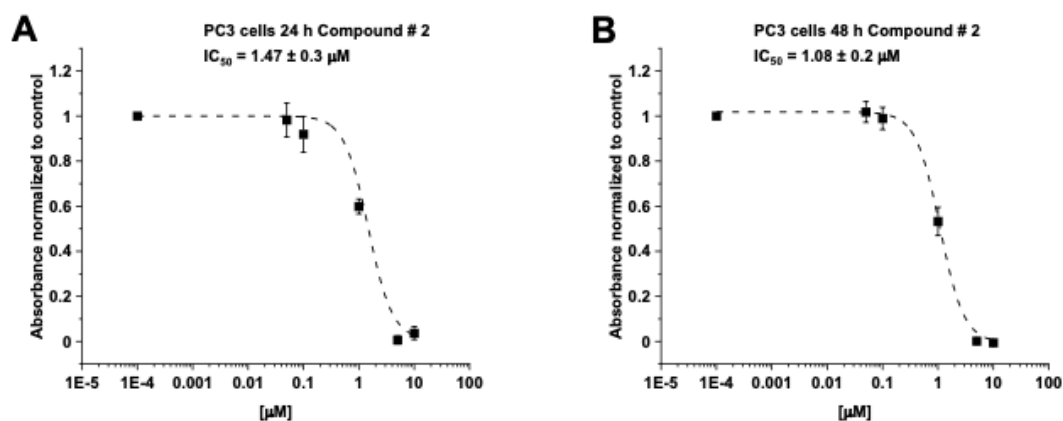



**Figure S60:** IC<sub>50</sub> determination for the treatment with compound #2 of PC3 for 24 (A) and 48 (B) hours.

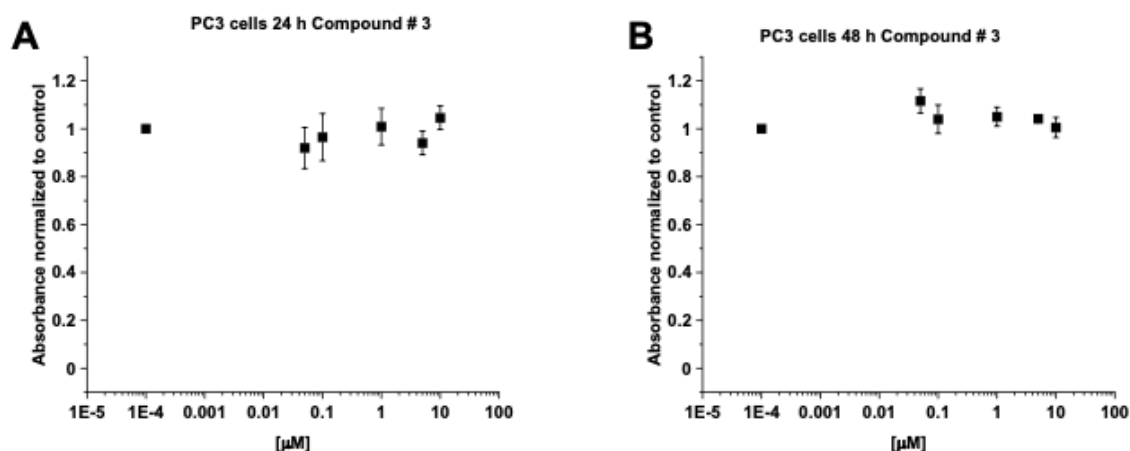

**Figure S61:** IC<sub>50</sub> determination for the treatment with compound #3 of PC3 for 24 (A) and 48 (B) hours.

#### *Flow cytometric evaluation of the cell cycle.*

60x10<sup>3</sup> of MDA-MB-231 and PC3 cell were respectively seeded in a 24-well plate with 1 mL of complete medium per well in duplicate. The two cell lines were treated with the compounds under examination at the concentrations resulting from the IC<sub>50</sub> for the 24- and 48-hours treatment obtained by the Trypan blue test (Table 5). At the beginning of the treatment (time 0) and after 24 and 48 hours respectively, the cells were detached and incubated on ice for 20 minutes with a solution of Propidium Iodide. Such dye, intercalating between the DNA bases, allows the evaluation of the cellular DNA content. At the end of the incubation time, the cells were analysed on a flow cytometer. At least 10x10<sup>3</sup> were analysed for each sample events. All histograms reported in Appendix A.

#### *Statistical Analysis*

Values reported in Table 5, in the IC<sub>50</sub> curves and in the column, charts correspond to the means ± ESM (Standard Error of Mean) of the 3 experiments conducted separately in triplicate. Statistical analysis was performed using the software

OriginLab 2020b. Column charts IC50 curves were obtained using the same software package. IC50 curves were fitted with the Hill equation. The reported cell cycle values in Table 6 and Table 7 are the mean  $\pm$  SD (Standard deviation) of two wells. Cell cycle analysis was performed using the FlowJo V10.7 software.

## Appendix A

### T0 MDA- Sample 1

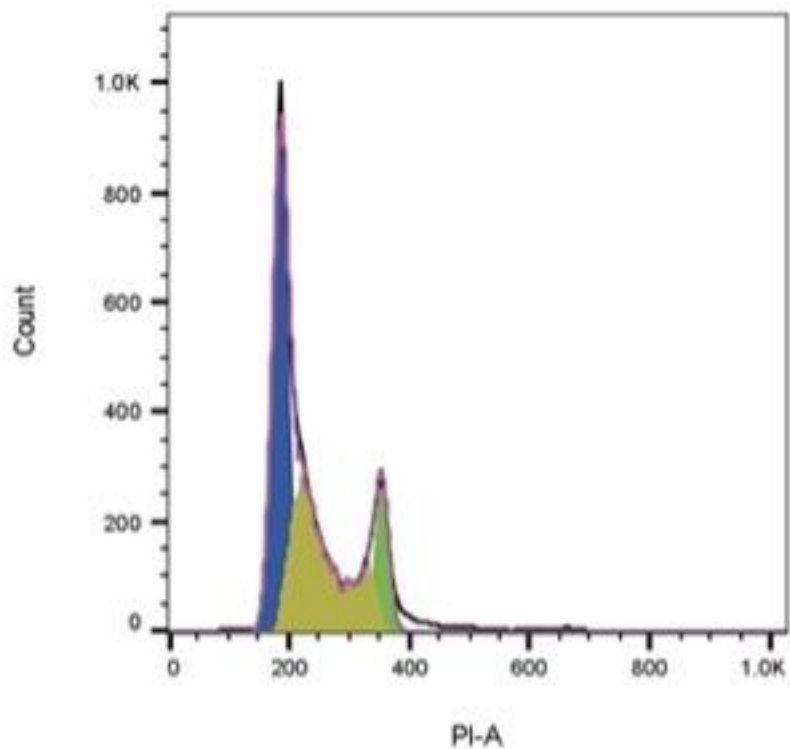

T0\_MDA1\_001.fcs  
Cell Cycle  
16052

RMSD : 8.97

%G1 : 47.8

%S : 39.8

%G2 : 12.3

G1 Mean : 187

G2 Mean : 356

G1 CV : 10.0

G2 CV : 4.49

% less G1 : -5.12

% greater G2 : 6.15

## T0 MDA- Sample 2

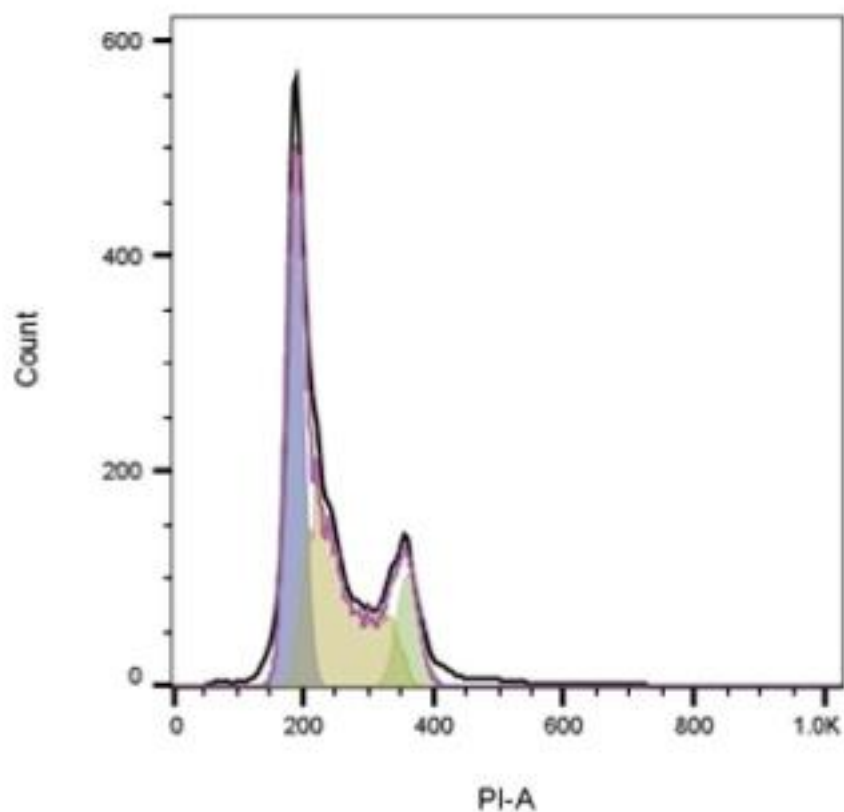

T0\_MDA1.fcs  
Cell Cycle  
11455

RMSD : 3.63  
%G1 : 41.2  
%S : 39.8  
%G2 : 11.8  
G1 Mean : 190  
G2 Mean : 362  
G1 CV : 10.0  
G2 CV : 6.71  
% less G1 : 1.45  
% greater G2 : 5.38

# T24 MDA- Control Sample 1

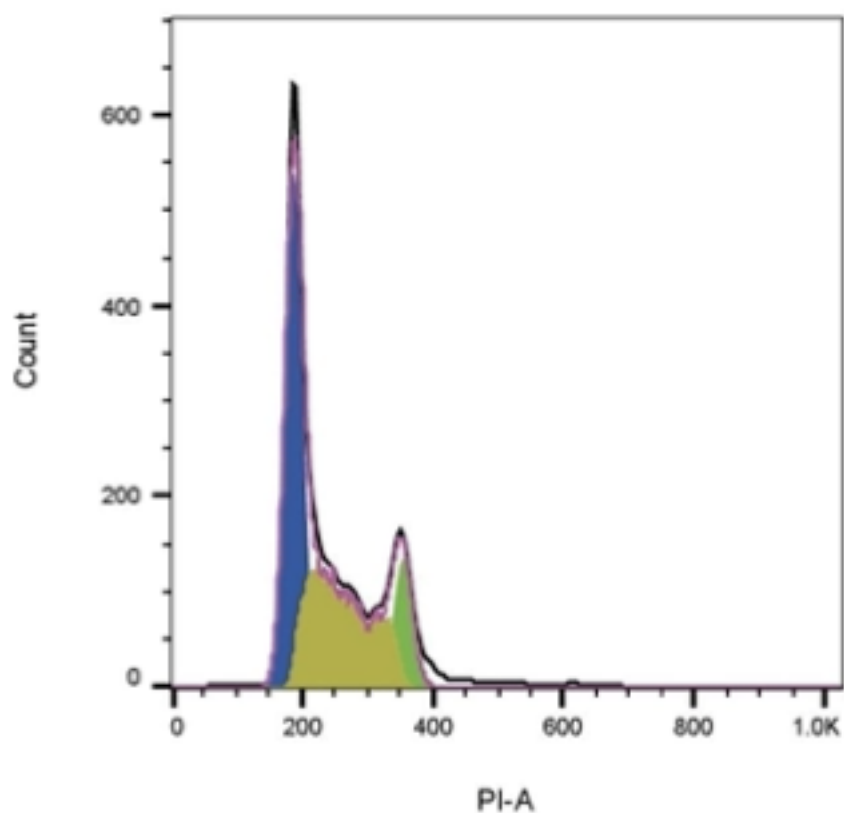

T24\_MDA C 2.fcs  
Cell Cycle  
10920

RMSD : 4.54  
%G1 : 46.9  
%S : 39.2  
%G2 : 12.4  
G1 Mean : 189  
G2 Mean : 357  
G1 CV : 10.0  
G2 CV : 5.56  
% less G1 : -2.55  
% greater G2 : 5.91

# T24 MDA- Control Sample 2

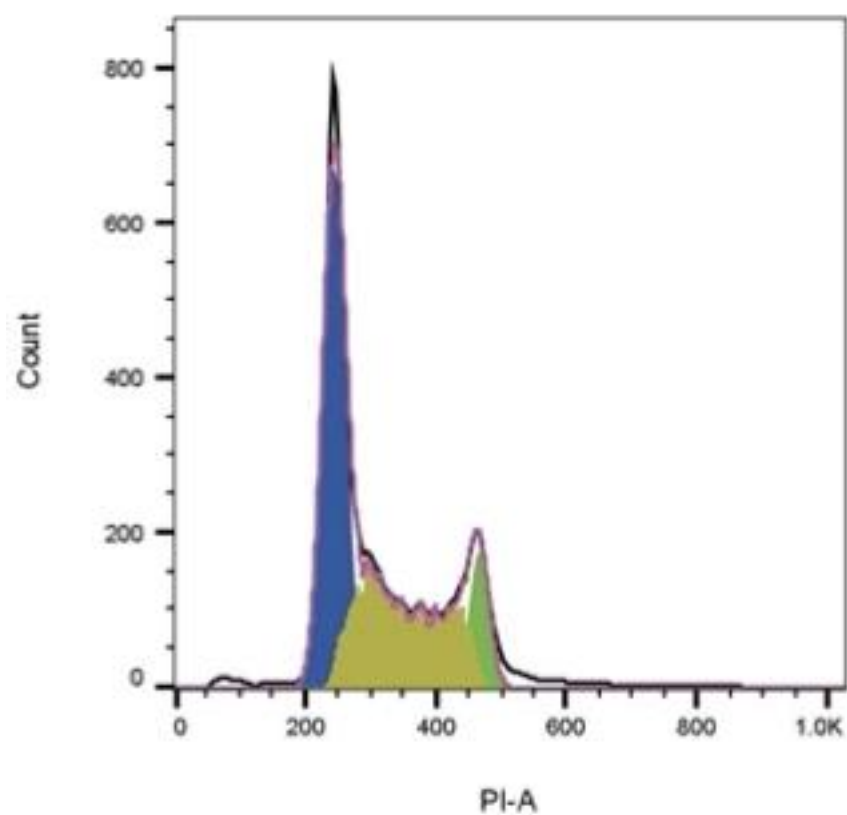

T24\_MDA C.fcs  
Cell Cycle  
16164

RMSD : 7.25  
%G1 : 49.1  
%S : 39.0  
%G2 : 10.9  
G1 Mean : 245  
G2 Mean : 468  
G1 CV : 10.0  
G2 CV : 4.45  
% less G1 : -2.47  
% greater G2 : 5.50

## T24 MDA- Compound #1 Sample 1

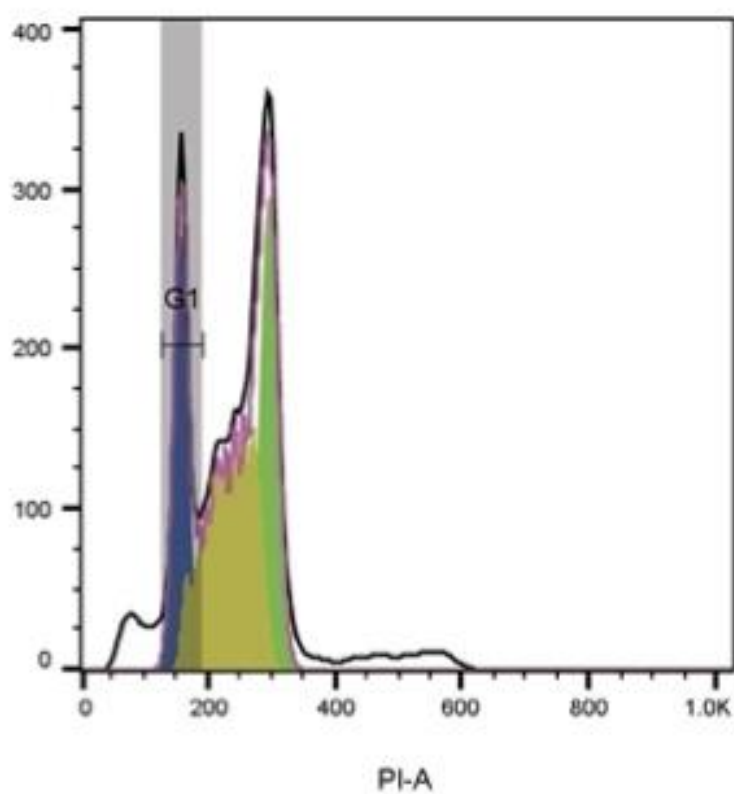

T24\_MDA1 2.fcs  
Cell Cycle  
10780

RMSD : 3.84  
%G1 : 21.0  
%S : 40.8  
%G2 : 28.2  
G1 Mean : 158  
G2 Mean : 299  
G1 CV : 10.0  
G2 CV : 6.55  
% less G1 : 4.36  
% greater G2 : 6.68

T24 MDA- Compound #2  
Sample 1

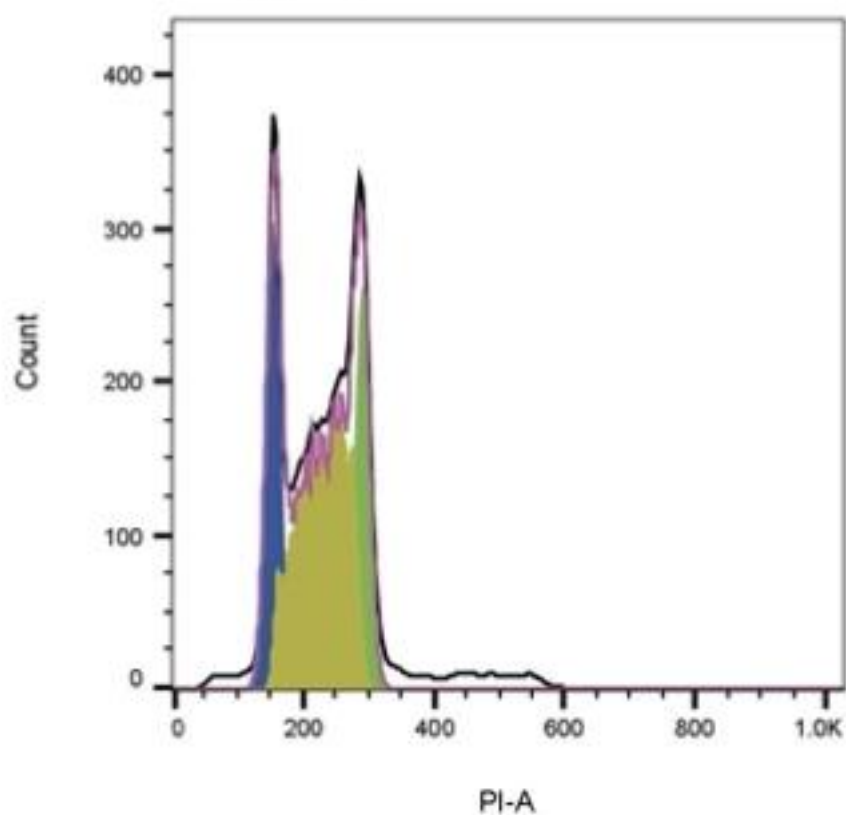

T24\_MDA2 1.fcs  
Cell Cycle  
10457

RMSD : 3.61  
%G1 : 23.3  
%S : 51.0  
%G2 : 20.6  
G1 Mean : 155  
G2 Mean : 293  
G1 CV : 10.0  
G2 CV : 5.44  
% less G1 : 0.18  
% greater G2 : 6.91



T24 MDA- Compound #1  
Sample 2

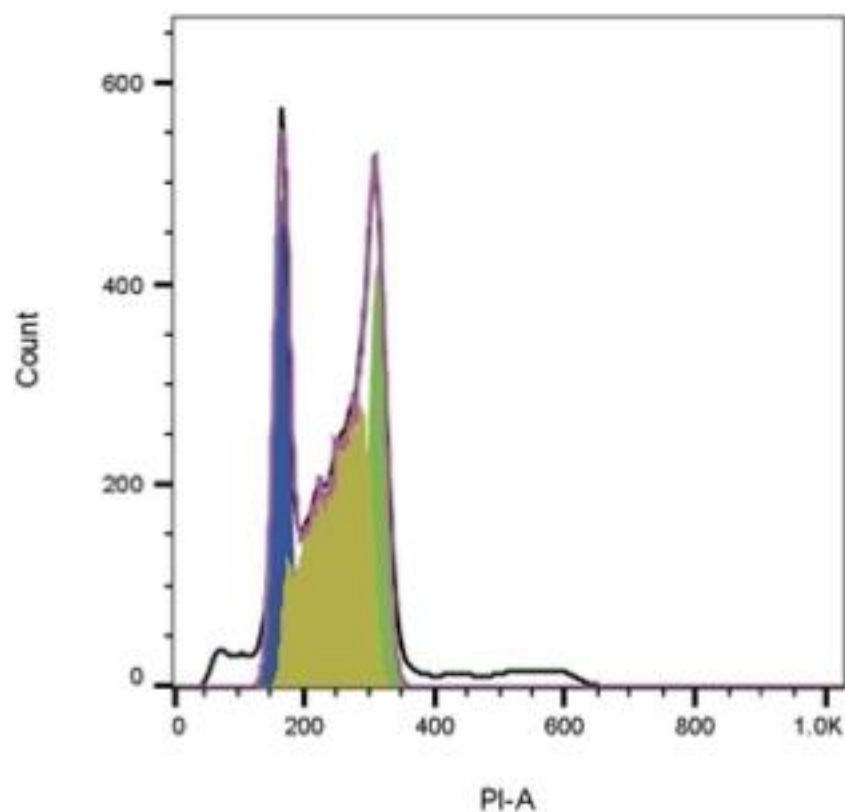

T24\_MDA1.fcs  
Cell Cycle  
16932

RMSD : 5.34  
%G1 : 22.9  
%S : 46.2  
%G2 : 21.8  
G1 Mean : 167  
G2 Mean : 315  
G1 CV : 10.0  
G2 CV : 5.80  
% less G1 : 3.47  
% greater G2 : 7.36

T24 MDA- Compound #2  
Sample 2

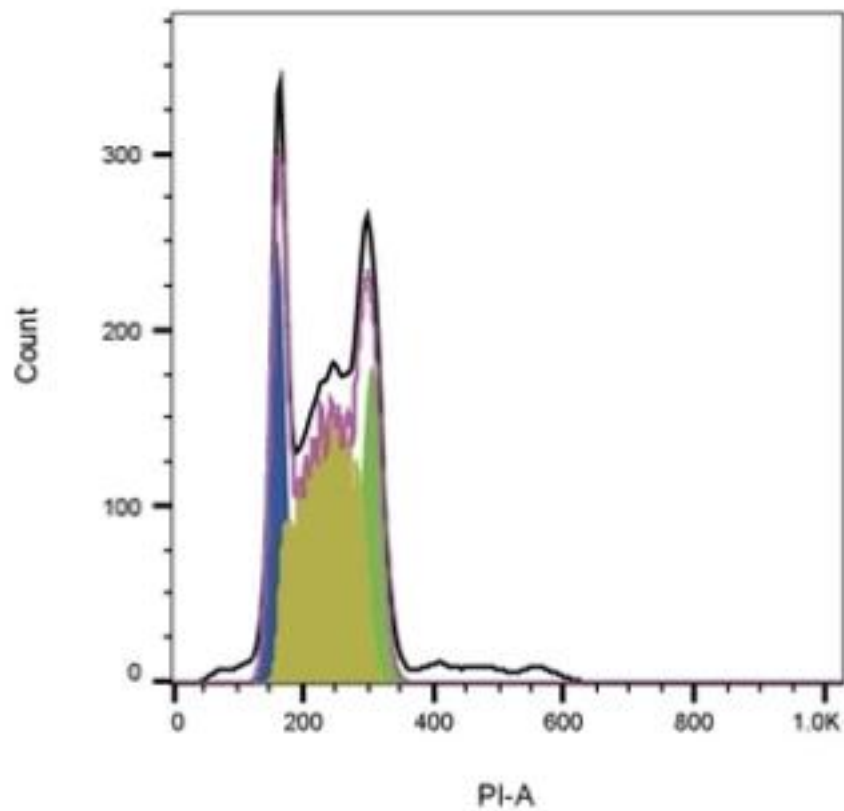

T24\_MDA2.fcs  
Cell Cycle  
10380

RMSD : 2.63  
%G1 : 21.6  
%S : 51.4  
%G2 : 20.9  
G1 Mean : 163  
G2 Mean : 307  
G1 CV : 10.0  
G2 CV : 7.15  
% less G1 : 1.30  
% greater G2 : 6.33

T24 MDA- Compound #3  
Sample 1

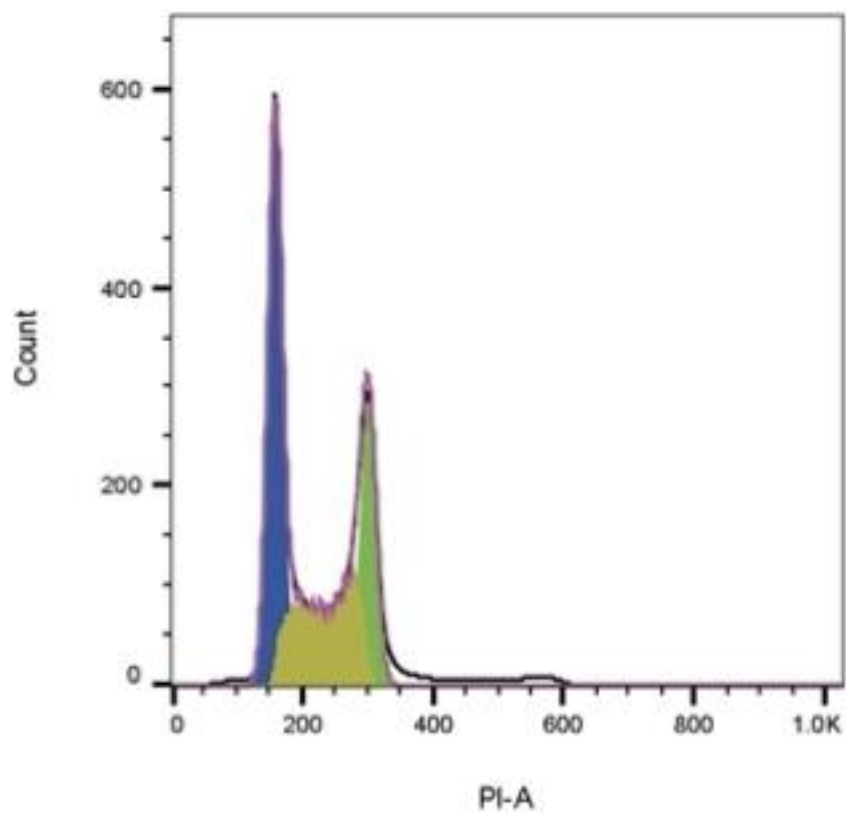

T24\_MDA3 2.fcs  
Cell Cycle  
9499

RMSD : 5.40  
%G1 : 44.0  
%S : 32.5  
%G2 : 22.9  
G1 Mean : 160  
G2 Mean : 304  
G1 CV : 10.0  
G2 CV : 5.45  
% less G1 : -3.95  
% greater G2 : 7.04

T24 MDA- Compound #3  
Sample 2

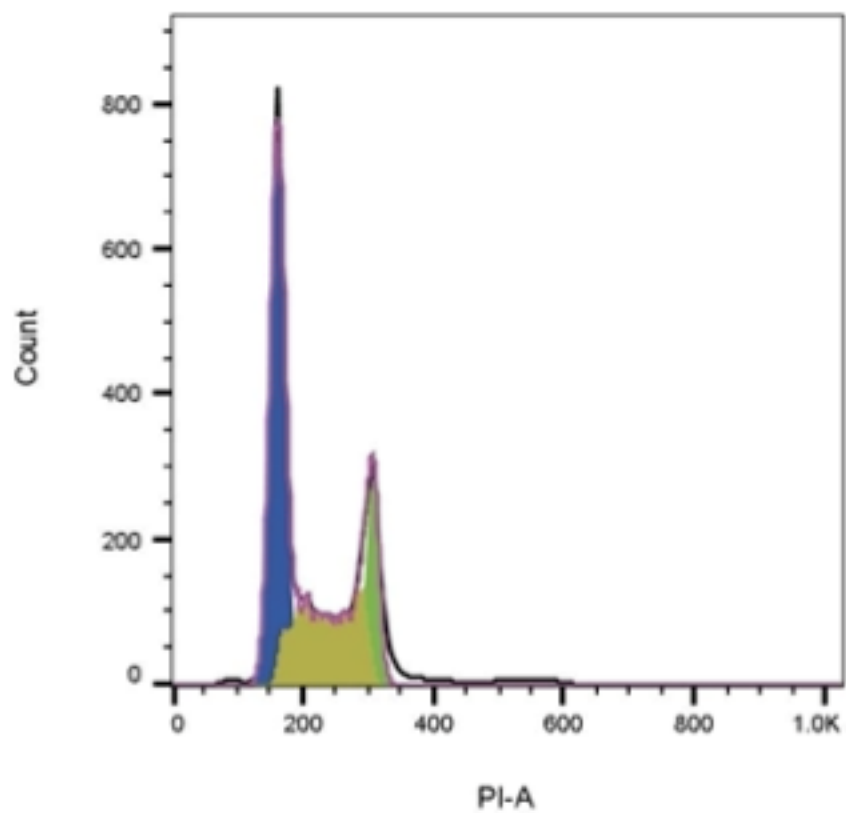

T24\_MDA3.fcs  
Cell Cycle  
11050

RMSD : 8.43  
%G1 : 51.7  
%S : 33.9  
%G2 : 16.8  
G1 Mean : 163  
G2 Mean : 309  
G1 CV : 10.0  
G2 CV : 4.51  
% less G1 : -6.08  
% greater G2 : 7.69

# T48 MDA- Control Sample 1

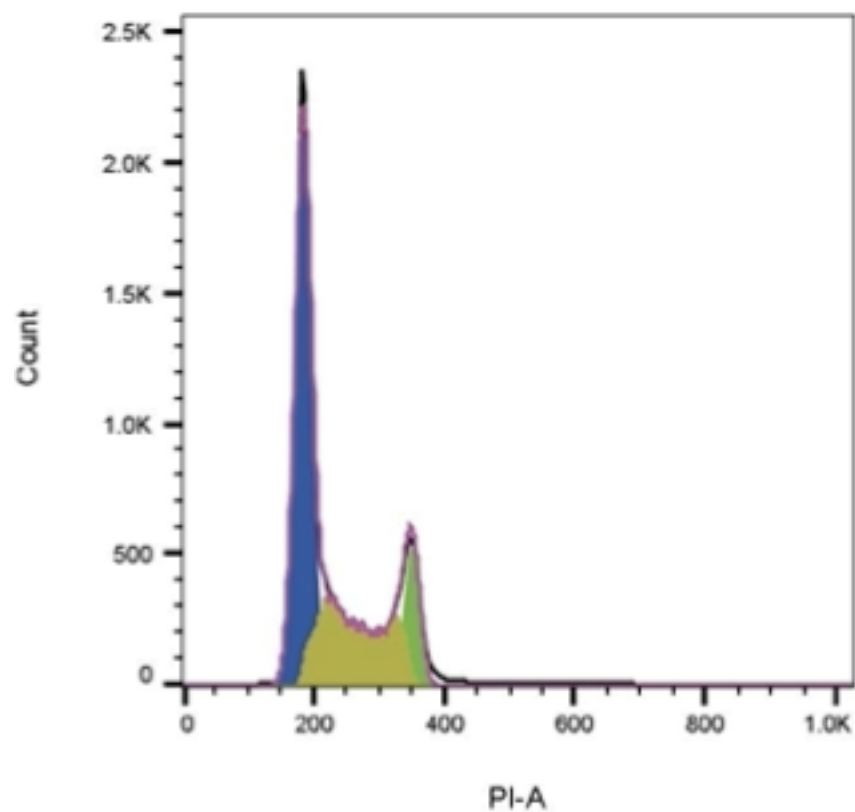

T48\_MDA C 2.fcs  
Cell Cycle  
30510

RMSD : 20.9  
%G1 : 58.6  
%S : 33.0  
%G2 : 13.0  
G1 Mean : 185  
G2 Mean : 352  
G1 CV : 10.0  
G2 CV : 4.67  
% less G1 : -6.10  
% greater G2 : 5.14

# T48 MDA- Control Sample 2

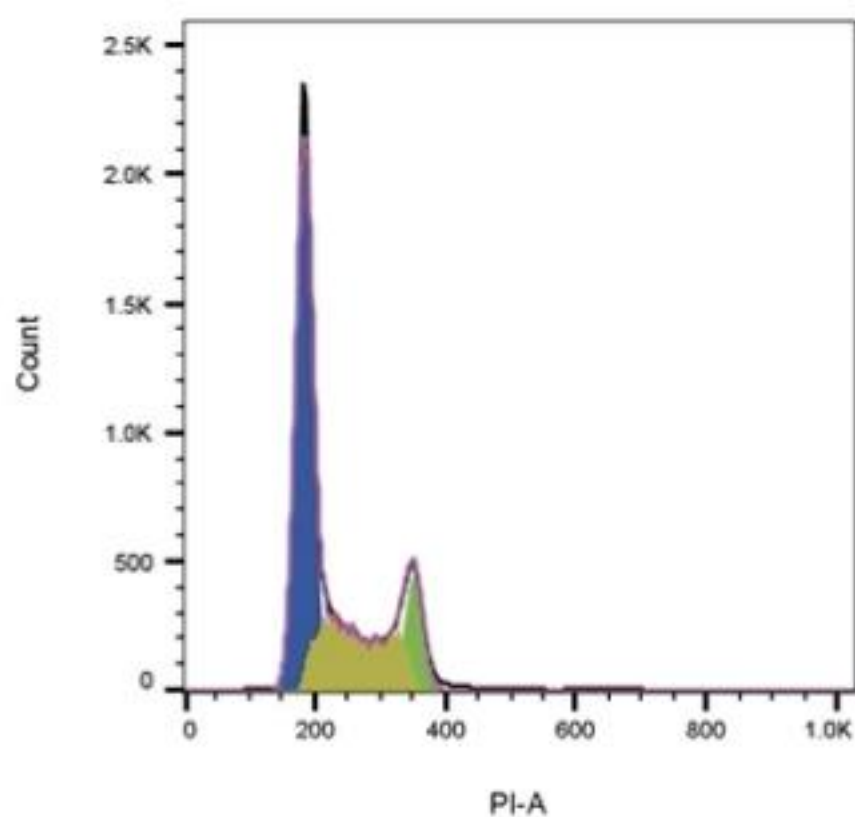

T48\_MDA C.fcs  
Cell Cycle  
30433

RMSD : 18.9  
%G1 : 59.7  
%S : 31.4  
%G2 : 13.1  
G1 Mean : 185  
G2 Mean : 354  
G1 CV : 10.0  
G2 CV : 5.35  
% less G1 : -4.91  
% greater G2 : 4.65

# T48 MDA- Compound #1 Sample 1

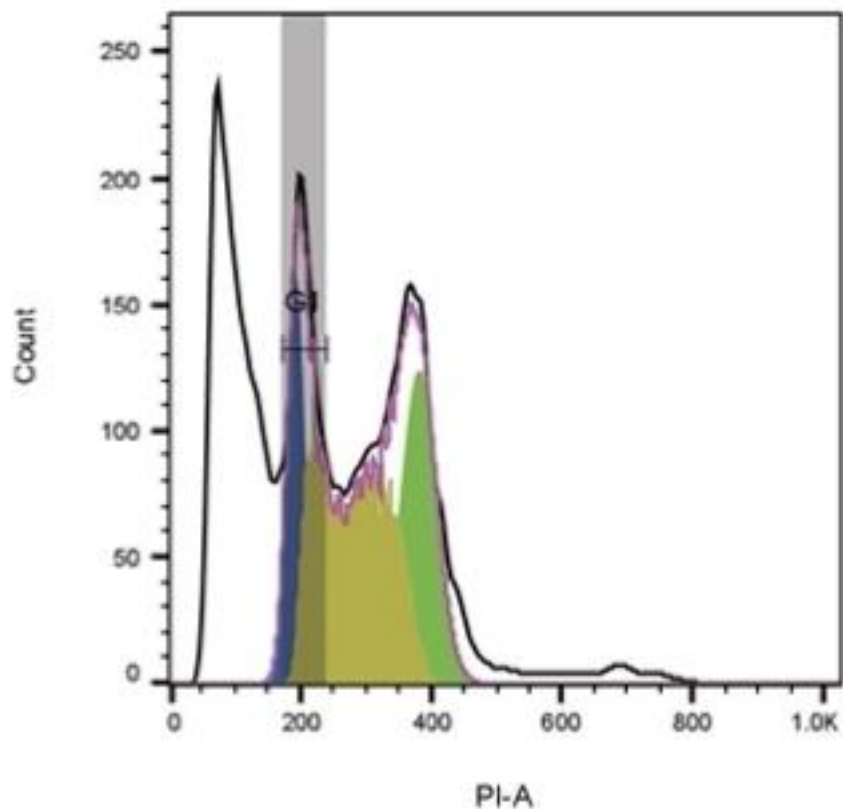

T48\_MDA1 2.fcs  
Cell Cycle  
12783

RMSD : 13.8  
%G1 : 12.3  
%S : 30.1  
%G2 : 18.6  
G1 Mean : 194  
G2 Mean : 382  
G1 CV : 10.0  
G2 CV : 10.0  
% less G1 : 33.6  
% greater G2 : 5.26

T48 MDA- Compound #1  
Sample 2

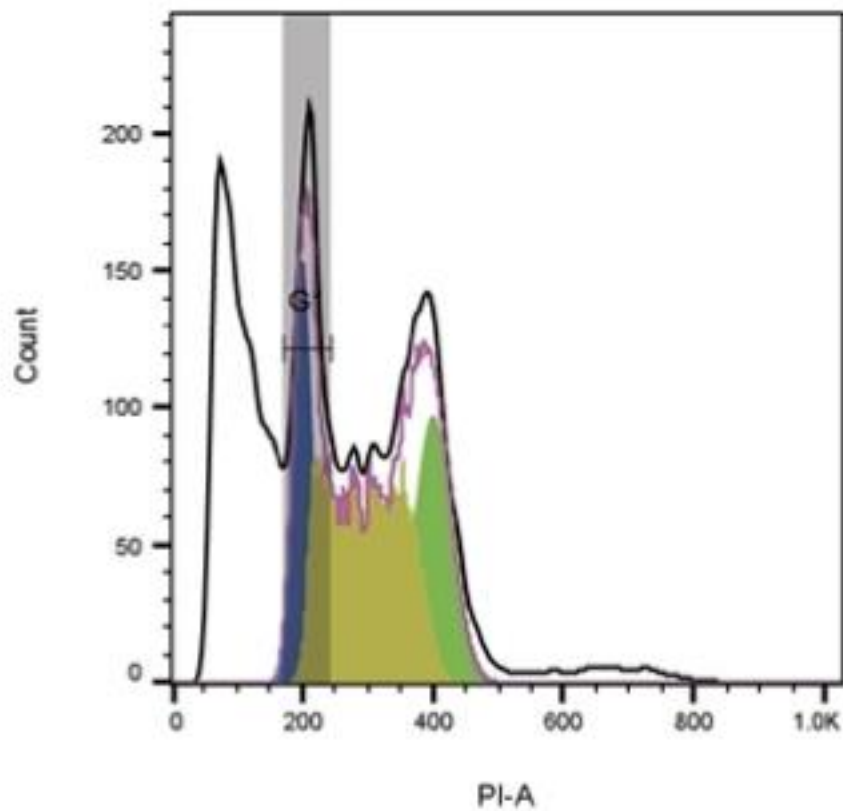

T48\_MDA1.fcs  
Cell Cycle  
12295

RMSD : 12.1  
%G1 : 13.8  
%S : 32.6  
%G2 : 17.3  
G1 Mean : 201  
G2 Mean : 401  
G1 CV : 9.97  
G2 CV : 10.0  
% less G1 : 32.0  
% greater G2 : 4.14



T48 MDA- Compound #2  
Sample 1

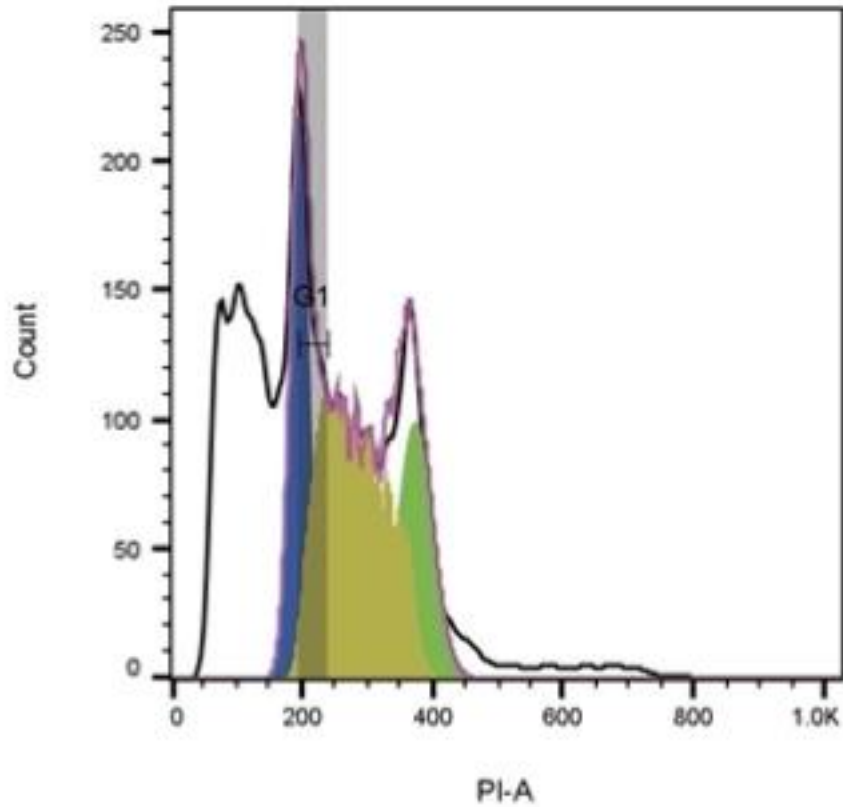

T48\_MDA2 1.fcs  
Cell Cycle  
11897

RMSD : 11.9  
%G1 : 16.7  
%S : 32.5  
%G2 : 14.3  
G1 Mean : 198  
G2 Mean : 375  
G1 CV : 10.0  
G2 CV : 10.00  
% less G1 : 34.6  
% greater G2 : 3.90

# T48 MDA- Compound #2 Sample 2

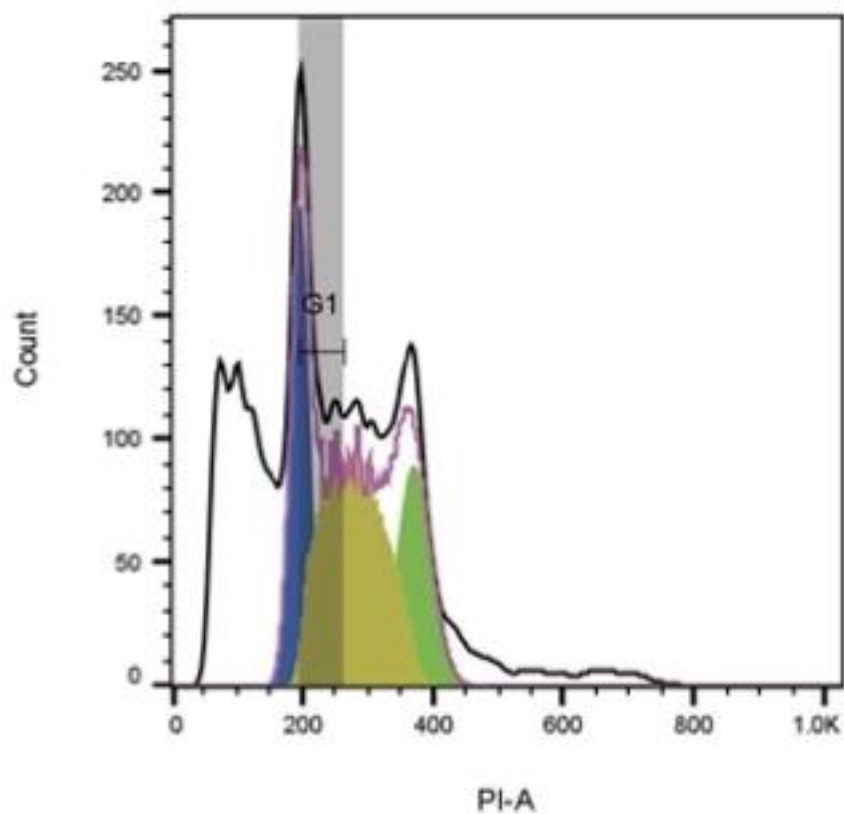

T48\_MDA2.fcs  
Cell Cycle  
11789

RMSD : 10.0  
%G1 : 18.7  
%S : 33.3  
%G2 : 16.0  
G1 Mean : 198  
G2 Mean : 372  
G1 CV : 10.0  
G2 CV : 10.0  
% less G1 : 27.8  
% greater G2 : 5.43

T48 MDA- Compound #3  
Sample 1

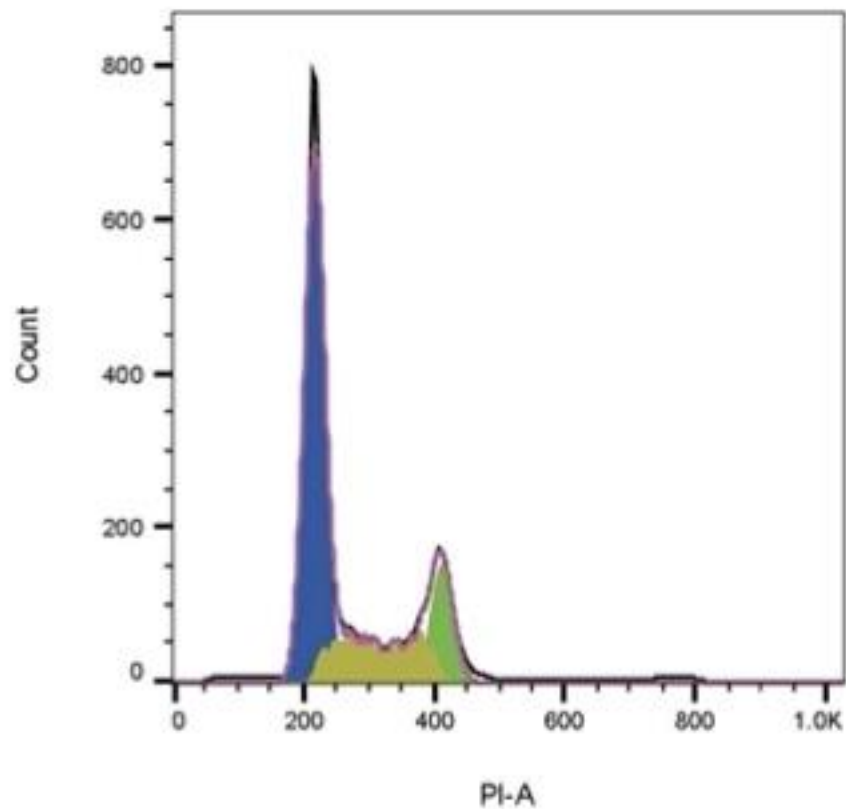

T48\_MDA3 2.fcs  
Cell Cycle  
10831

RMSD : 9.90  
%G1 : 66.4  
%S : 25.2  
%G2 : 16.5  
G1 Mean : 217  
G2 Mean : 413  
G1 CV : 10.0  
G2 CV : 5.72  
% less G1 : -7.47  
% greater G2 : 5.48

T48 MDA- Compound #3  
Sample 2

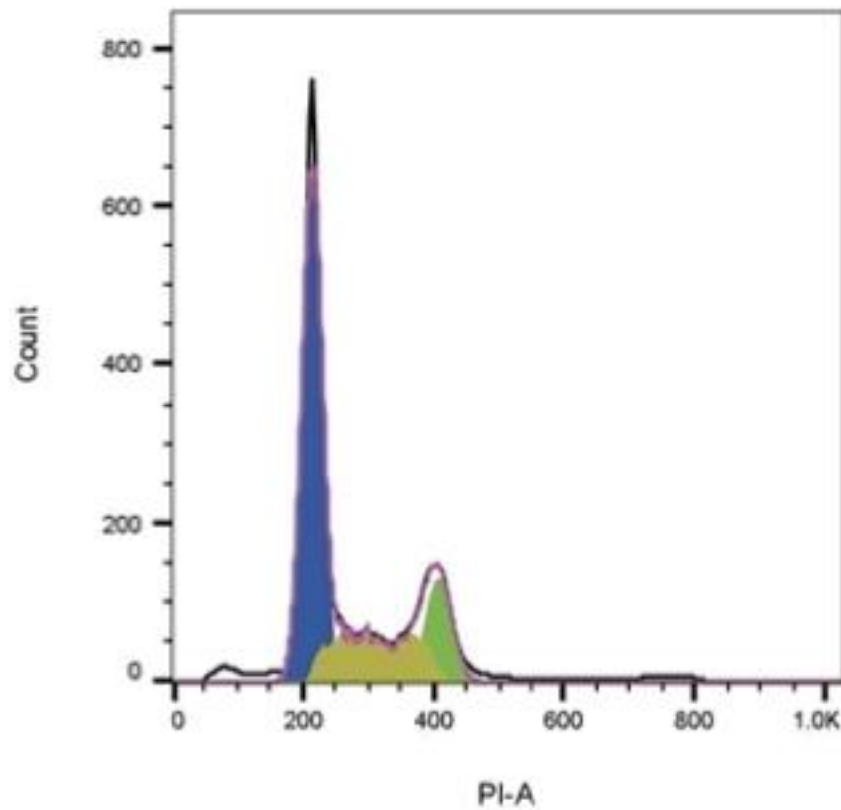

T48\_MDA3.fcs  
Cell Cycle  
11046

RMSD : 7.95  
%G1 : 61.0  
%S : 24.9  
%G2 : 16.2  
G1 Mean : 215  
G2 Mean : 409  
G1 CV : 10.0  
G2 CV : 6.79  
% less G1 : -2.54  
% greater G2 : 5.84

## T0 PC3- Sample 1

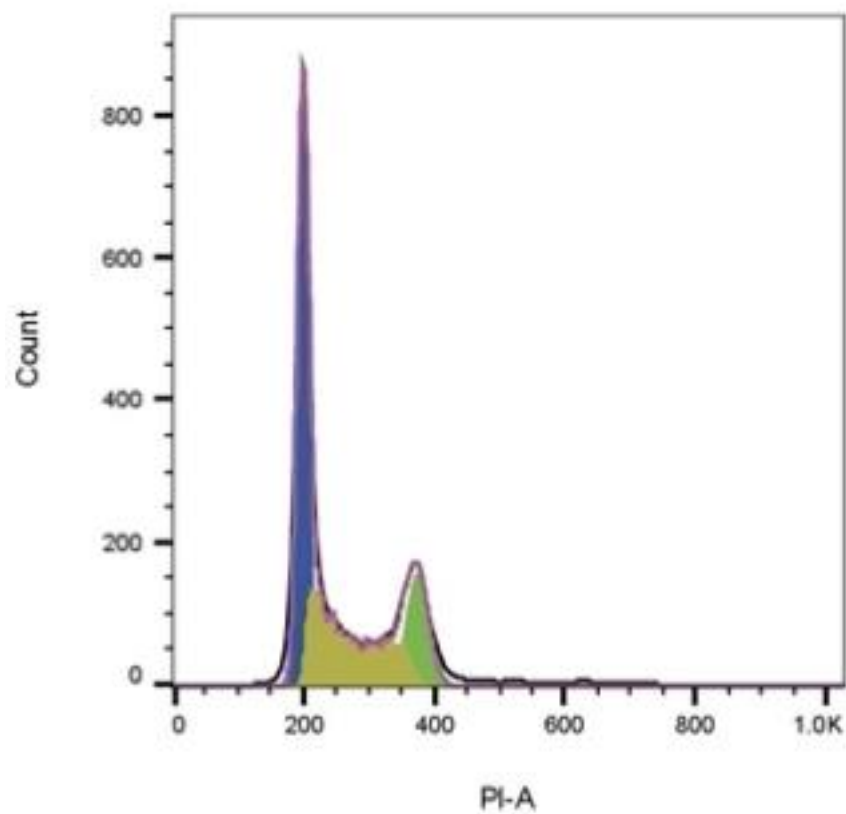

T0\_PC3\_001.fcs  
Cell Cycle  
11280

RMSD : 3.14  
%G1 : 43.1  
%S : 31.7  
%G2 : 16.1  
G1 Mean : 200  
G2 Mean : 375  
G1 CV : 6.02  
G2 CV : 6.34  
% less G1 : 2.99  
% greater G2 : 6.65

## T0 PC3- Sample 2

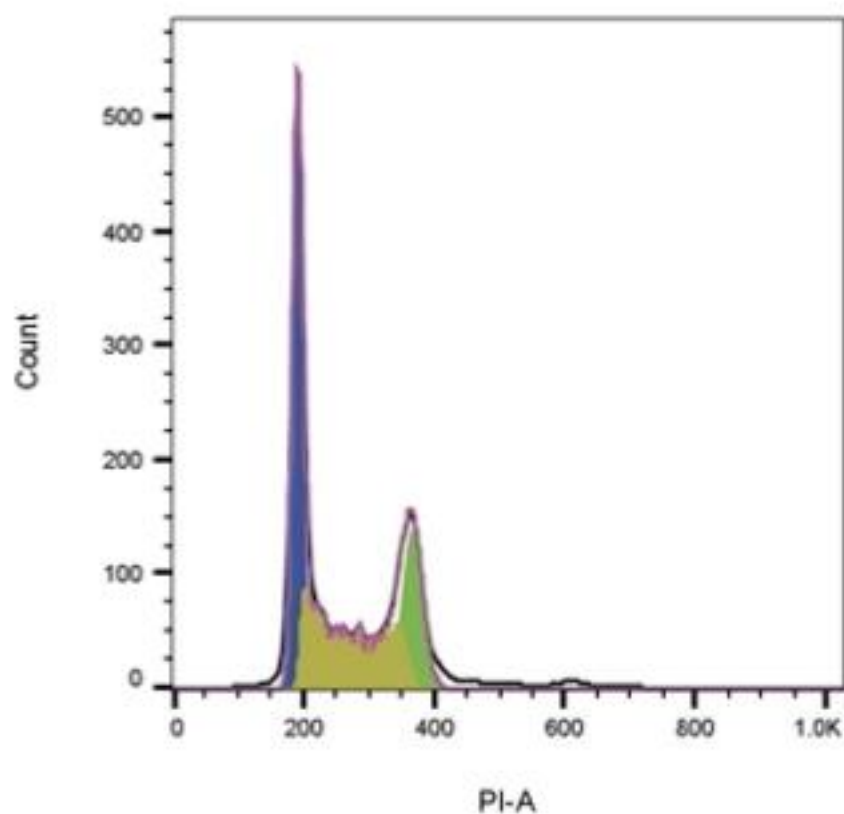

T0\_PC3\_002.fcs  
Cell Cycle  
7277

RMSD : 2.66  
%G1 : 35.6  
%S : 35.2  
%G2 : 20.4  
G1 Mean : 192  
G2 Mean : 369  
G1 CV : 5.43  
G2 CV : 6.05  
% less G1 : 2.34  
% greater G2 : 7.14

## T24 PC3- Control Sample 1

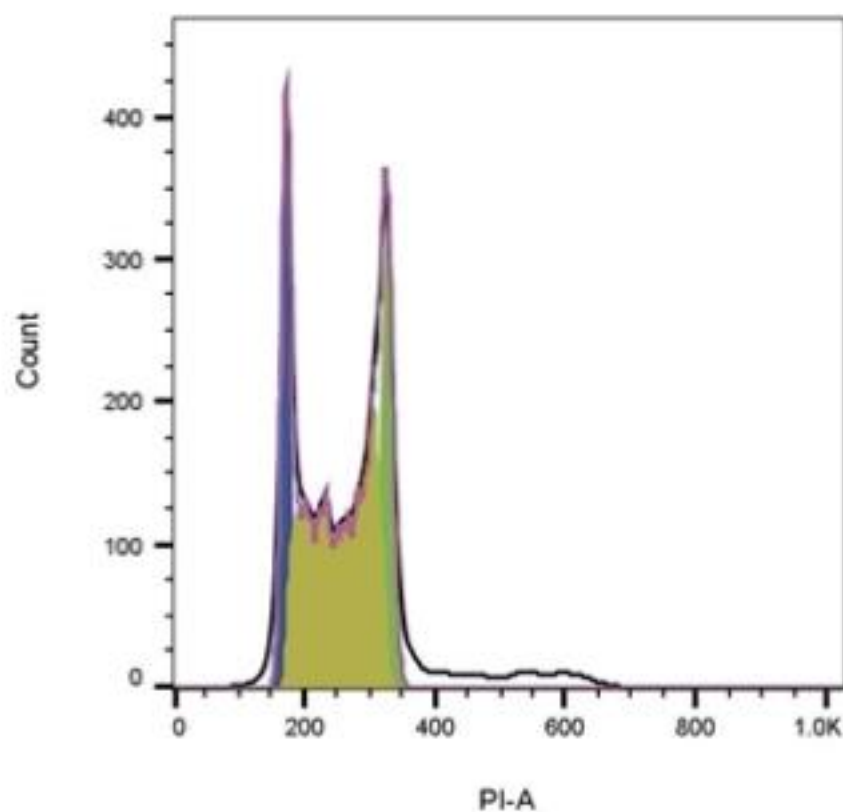

T24\_PC3 C 2.fcs  
Cell Cycle  
10335

RMSD : 3.26  
%G1 : 17.8  
%S : 51.3  
%G2 : 18.9  
G1 Mean : 173  
G2 Mean : 329  
G1 CV : 5.66  
G2 CV : 3.85  
% less G1 : 2.04  
% greater G2 : 10.0

## T24 PC3- Control Sample 2

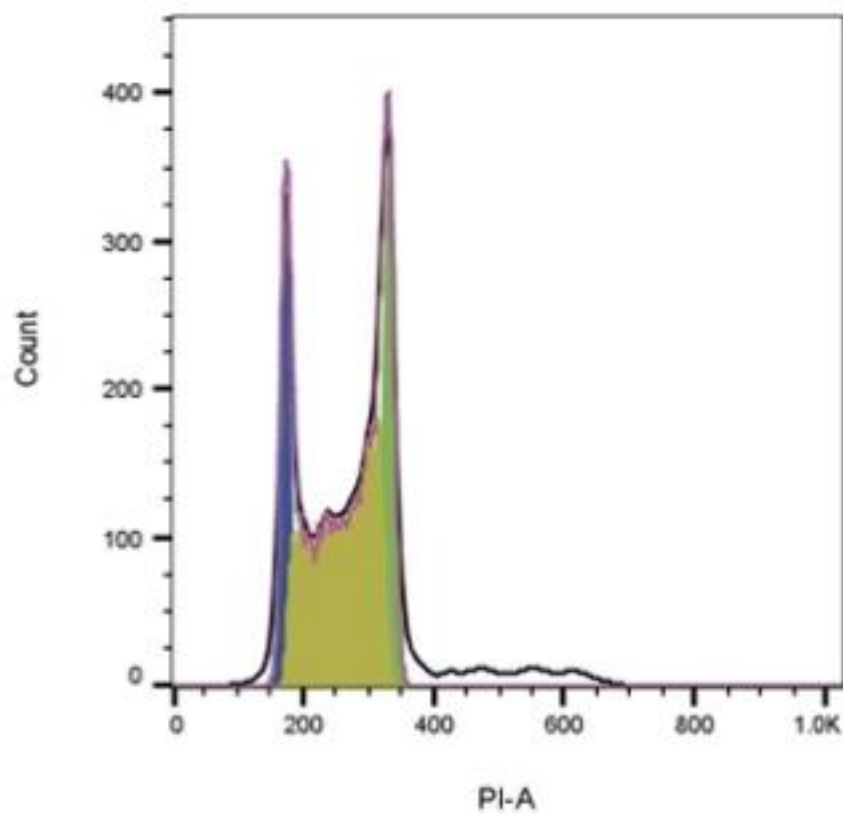

T24\_PC3 C 3.fcs  
Cell Cycle  
10073

RMSD : 3.20  
%G1 : 16.6  
%S : 50.4  
%G2 : 20.7  
G1 Mean : 174  
G2 Mean : 332  
G1 CV : 6.15  
G2 CV : 3.62  
% less G1 : 1.84  
% greater G2 : 10.6



## T24 PC3- Control Sample 3

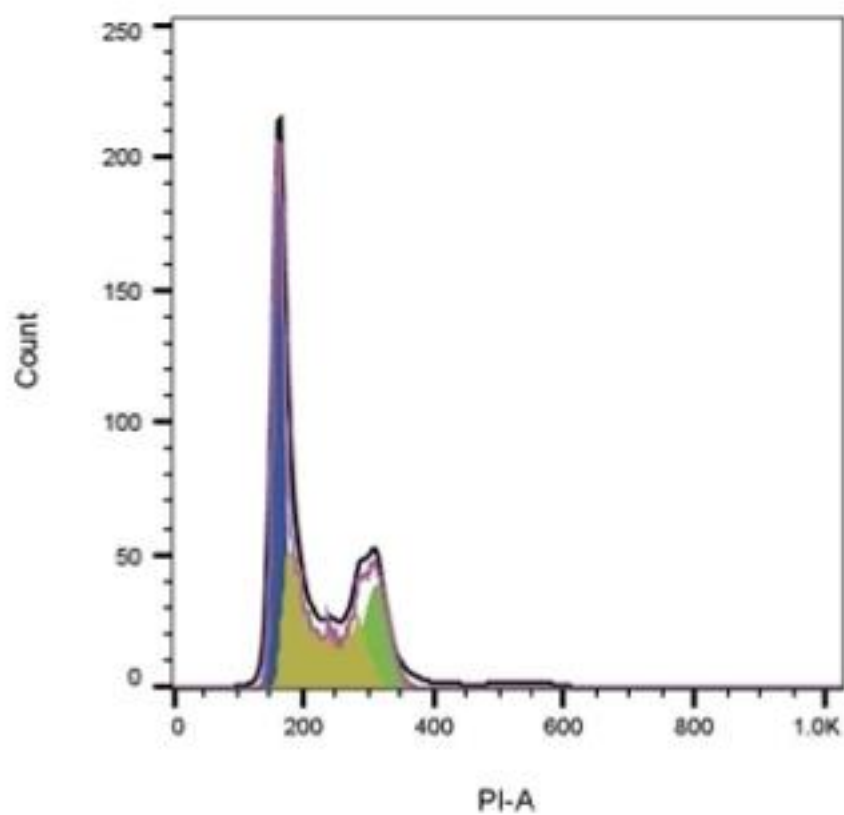

T24\_PC3 C.fcs  
Cell Cycle  
3333

RMSD : 1.41  
%G1 : 38.5  
%S : 37.8  
%G2 : 17.9  
G1 Mean : 164  
G2 Mean : 314  
G1 CV : 7.14  
G2 CV : 8.81  
% less G1 : 1.61  
% greater G2 : 4.38

T24 PC3-compound #1  
Sample 1

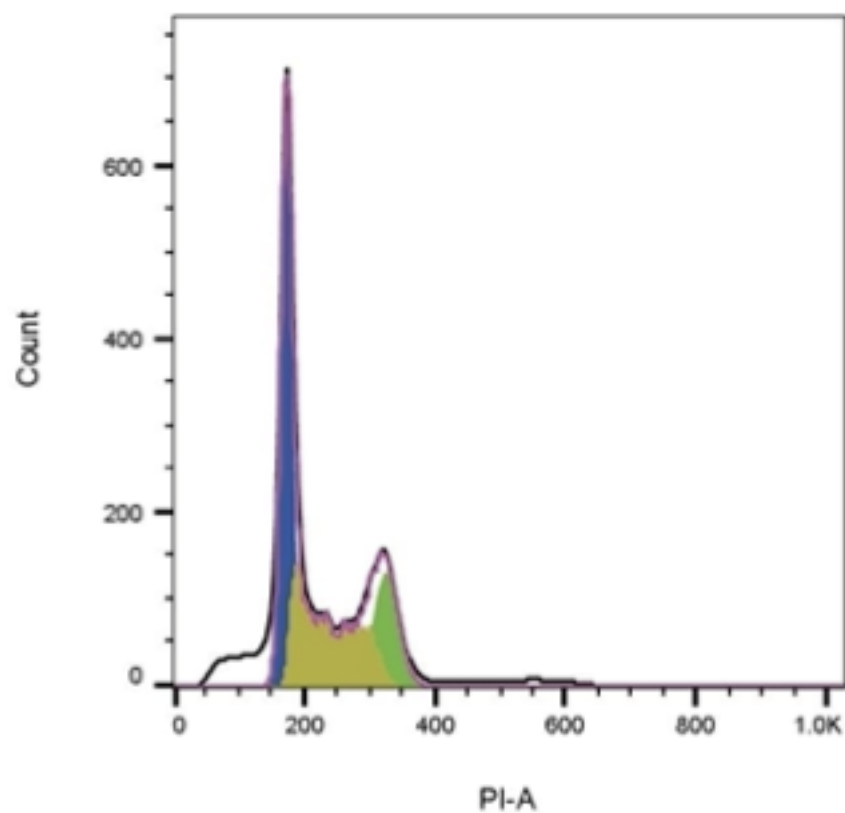

T24\_PC3 1 2.fcs  
Cell Cycle  
10552

RMSD : 4.32  
%G1 : 38.0  
%S : 30.7  
%G2 : 16.7  
G1 Mean : 174  
G2 Mean : 327  
G1 CV : 6.85  
G2 CV : 8.34  
% less G1 : 9.95  
% greater G2 : 5.13

T24 PC3-compound #1  
Sample 2

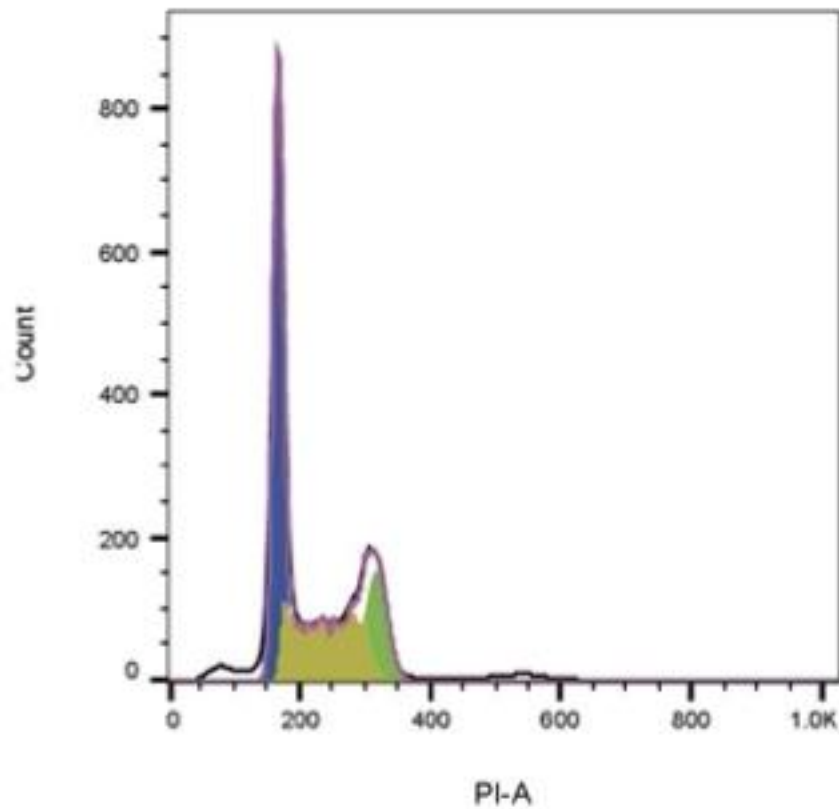

T24\_PC3 1.fcs  
Cell Cycle  
10526

RMSD : 3.49  
%G1 : 42.2  
%S : 32.1  
%G2 : 16.8  
G1 Mean : 168  
G2 Mean : 319  
G1 CV : 6.27  
G2 CV : 7.28  
% less G1 : 5.01  
% greater G2 : 4.64

T24 PC3-compound #2  
Sample 1

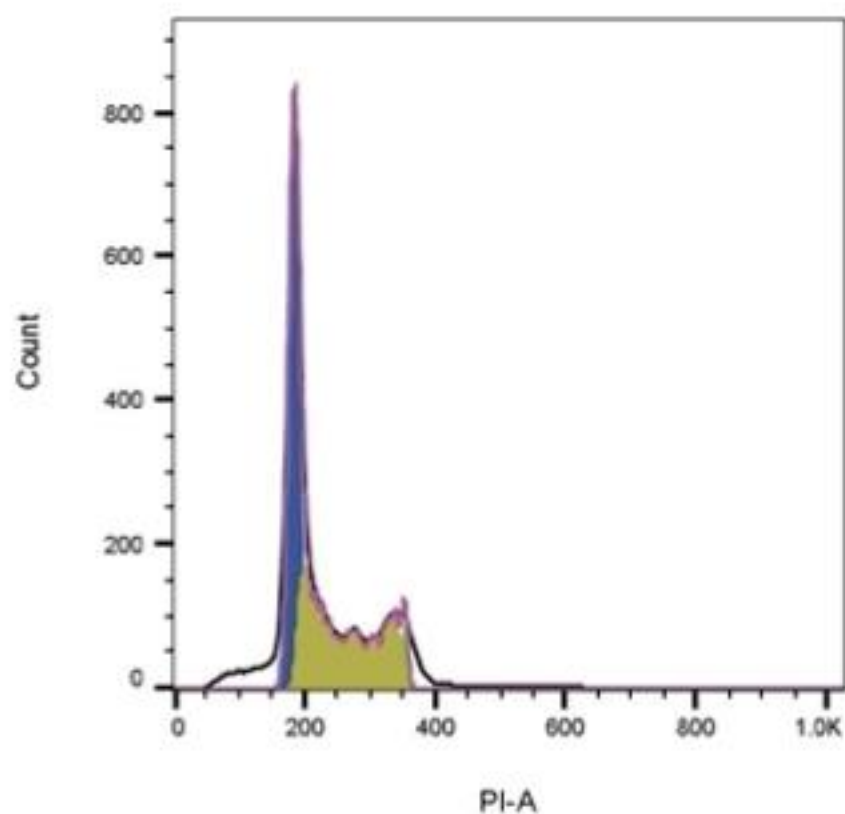

T24\_PC3 2 2.fcs  
Cell Cycle  
10604

RMSD : 4.50  
%G1 : 41.3  
%S : 40.3  
%G2 : 2.93  
G1 Mean : 185  
G2 Mean : 355  
G1 CV : 6.17  
G2 CV : 1.84  
% less G1 : 8.62  
% greater G2 : 6.87

T24 PC3-compound #2  
Sample 2

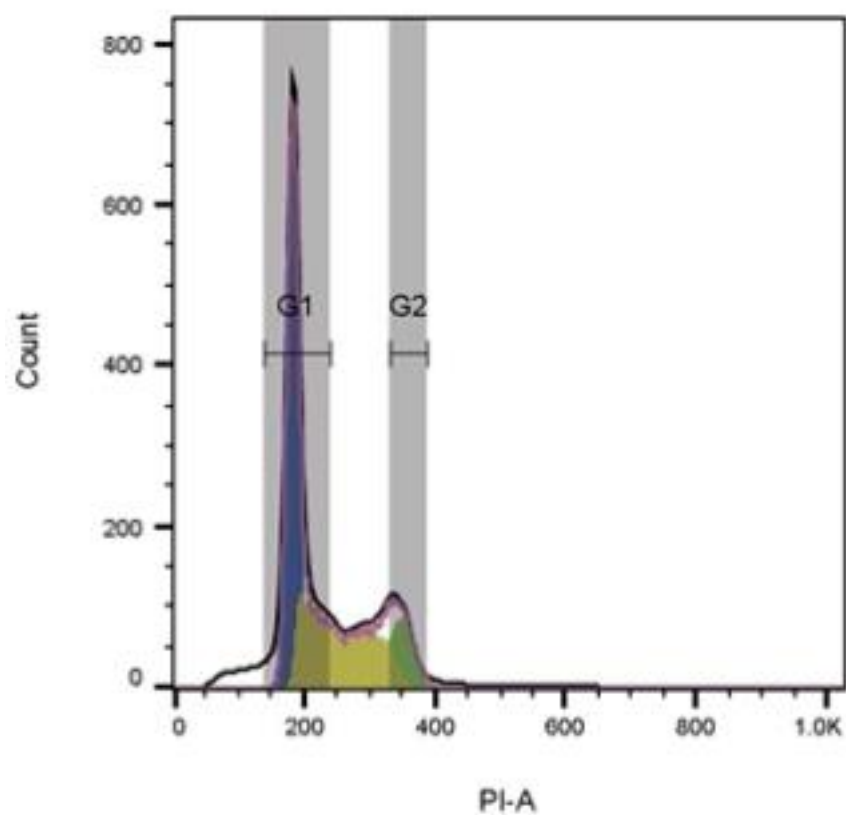

T24\_PC3 2.fcs  
Cell Cycle  
10371

RMSD : 3.86  
%G1 : 43.2  
%S : 34.6  
%G2 : 11.7  
G1 Mean : 184  
G2 Mean : 350  
G1 CV : 6.65  
G2 CV : 7.78  
% less G1 : 7.55  
% greater G2 : 3.40

# T24 PC3-compound #3 Sample 1

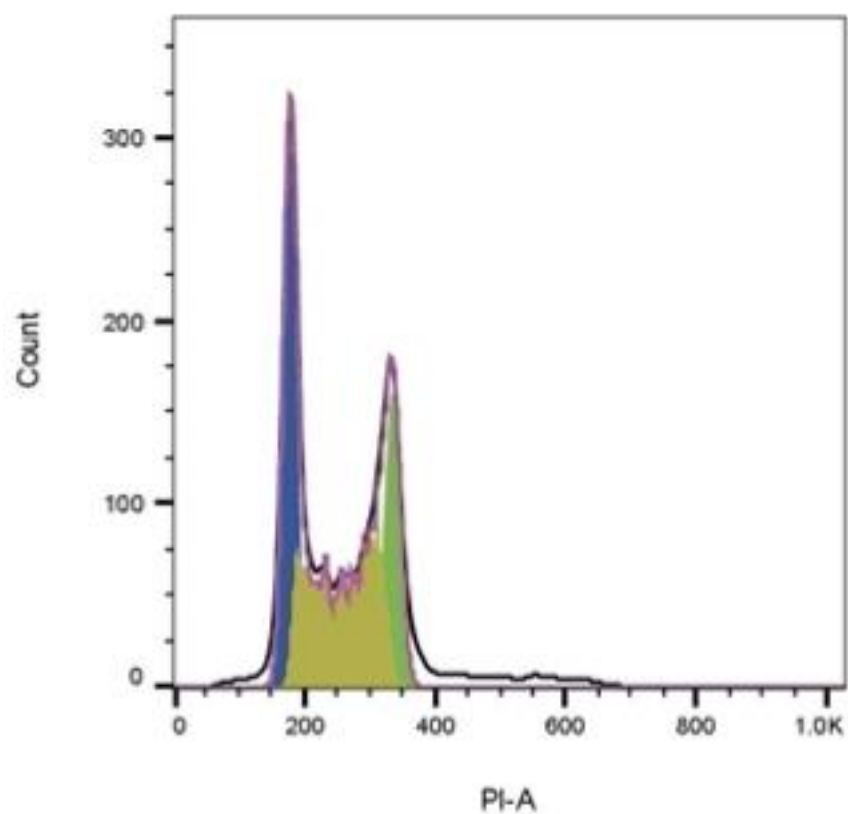

T24\_PC3 3 2.fcs  
Cell Cycle  
6921

RMSD : 2.08  
%G1 : 30.0  
%S : 39.5  
%G2 : 19.3  
G1 Mean : 179  
G2 Mean : 337  
G1 CV : 7.88  
G2 CV : 5.03  
% less G1 : 2.29  
% greater G2 : 9.00

T24 PC3-compound #3  
Sample 2

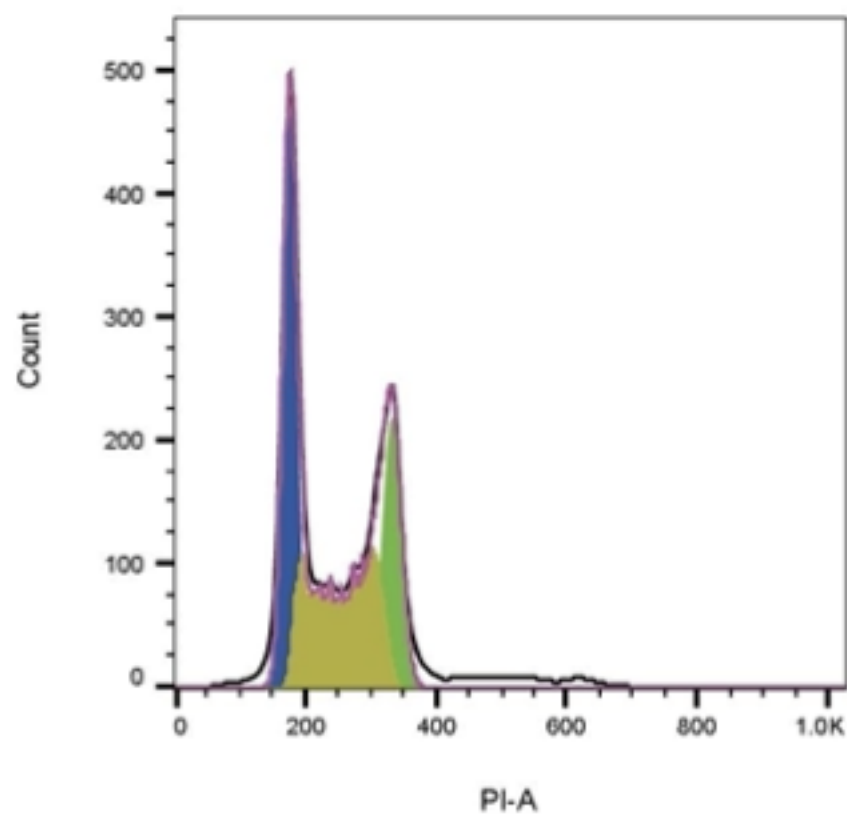

T24\_PC3 3.fcs  
Cell Cycle  
10143

RMSD : 2.87  
%G1 : 33.8  
%S : 35.7  
%G2 : 20.8  
G1 Mean : 177  
G2 Mean : 335  
G1 CV : 8.41  
G2 CV : 5.88  
% less G1 : 2.48  
% greater G2 : 7.63

## T48 PC3- Control Sample 1

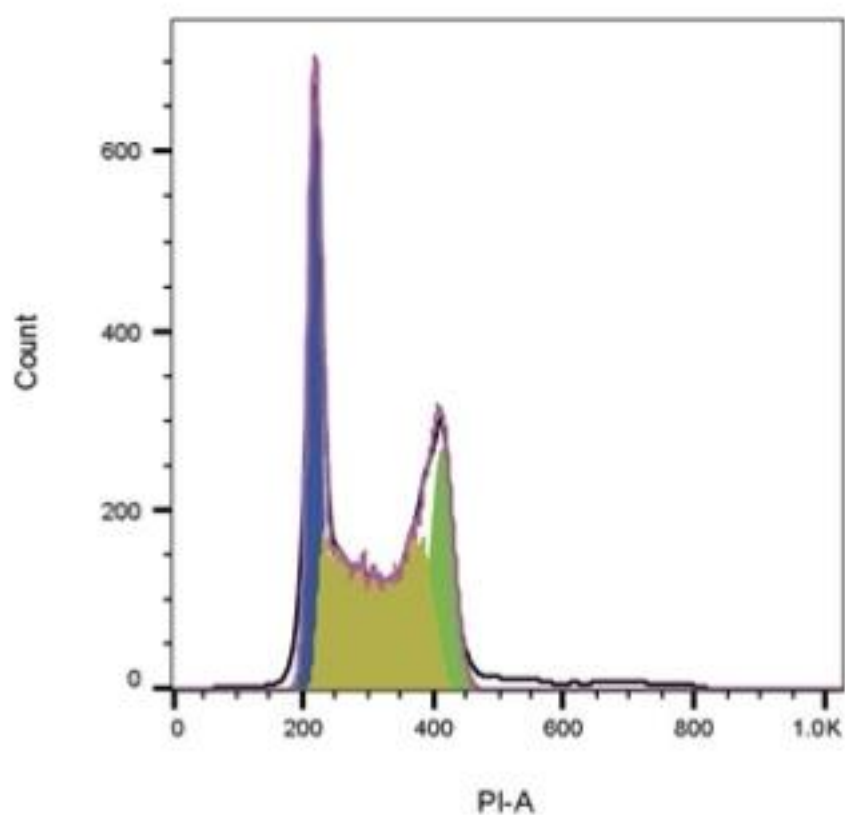

T48\_PC3 C 2.fcs  
Cell Cycle  
15618

RMSD : 3.91  
%G1 : 26.3  
%S : 44.9  
%G2 : 19.3  
G1 Mean : 219  
G2 Mean : 415  
G1 CV : 6.09  
G2 CV : 5.81  
% less G1 : 3.04  
% greater G2 : 6.38



## T48 PC3- Control Sample 2

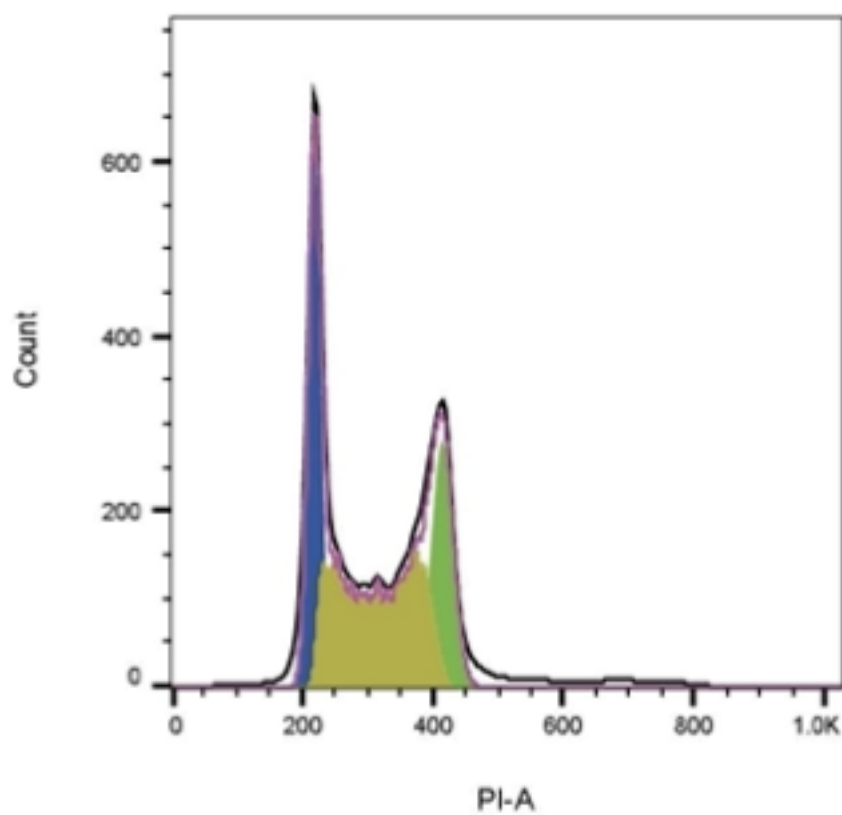

T48\_PC3 C 3.fcs  
Cell Cycle  
15477

RMSD : 3.84  
%G1 : 27.3  
%S : 42.9  
%G2 : 20.9  
G1 Mean : 220  
G2 Mean : 416  
G1 CV : 6.21  
G2 CV : 5.47  
% less G1 : 2.56  
% greater G2 : 6.30

## T48 PC3- Control Sample 3

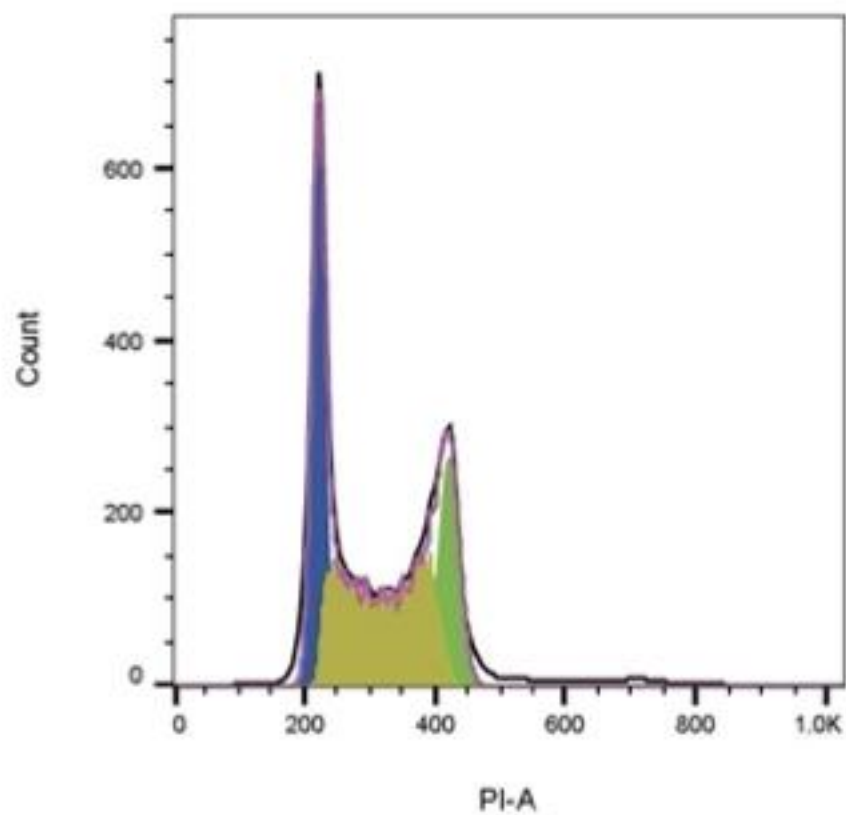

T48\_PC3 C.fcs  
Cell Cycle  
15262

RMSD : 4.08  
%G1 : 30.7  
%S : 41.9  
%G2 : 19.3  
G1 Mean : 222  
G2 Mean : 423  
G1 CV : 6.46  
G2 CV : 5.28  
% less G1 : 2.80  
% greater G2 : 5.68

# T48 PC3- Compound #1

## Sample 1

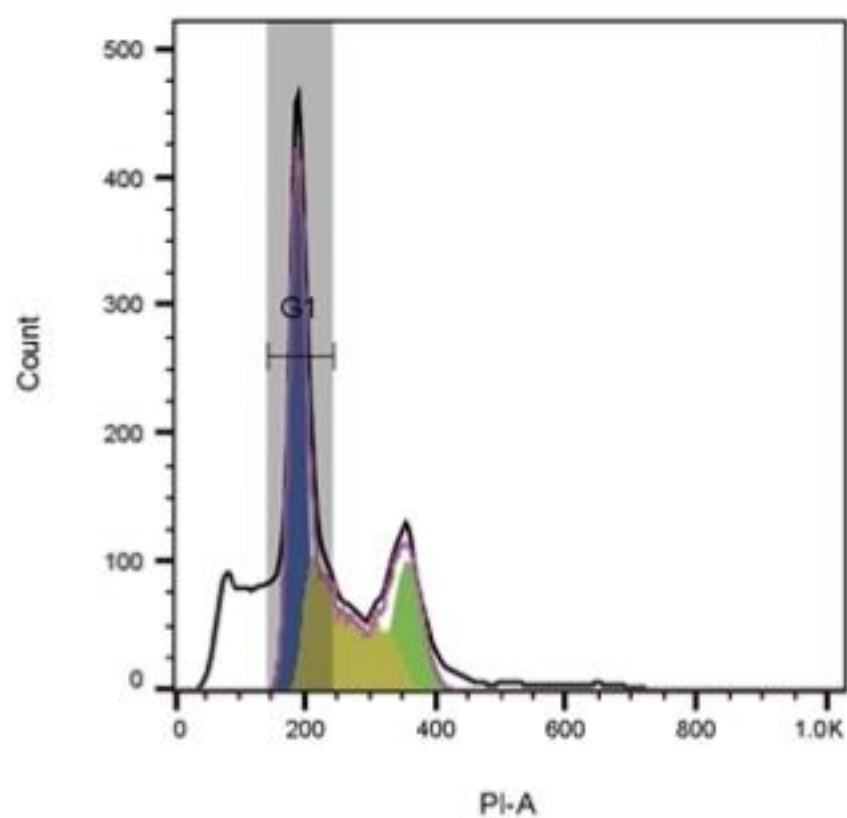

T48\_PC3 1 2.fcs  
Cell Cycle  
11013

RMSD : 7.34  
%G1 : 31.9  
%S : 27.1  
%G2 : 14.7  
G1 Mean : 190  
G2 Mean : 359  
G1 CV : 8.63  
G2 CV : 8.42  
% less G1 : 20.2  
% greater G2 : 5.53

T48 PC3- Compound #1  
Sample 2

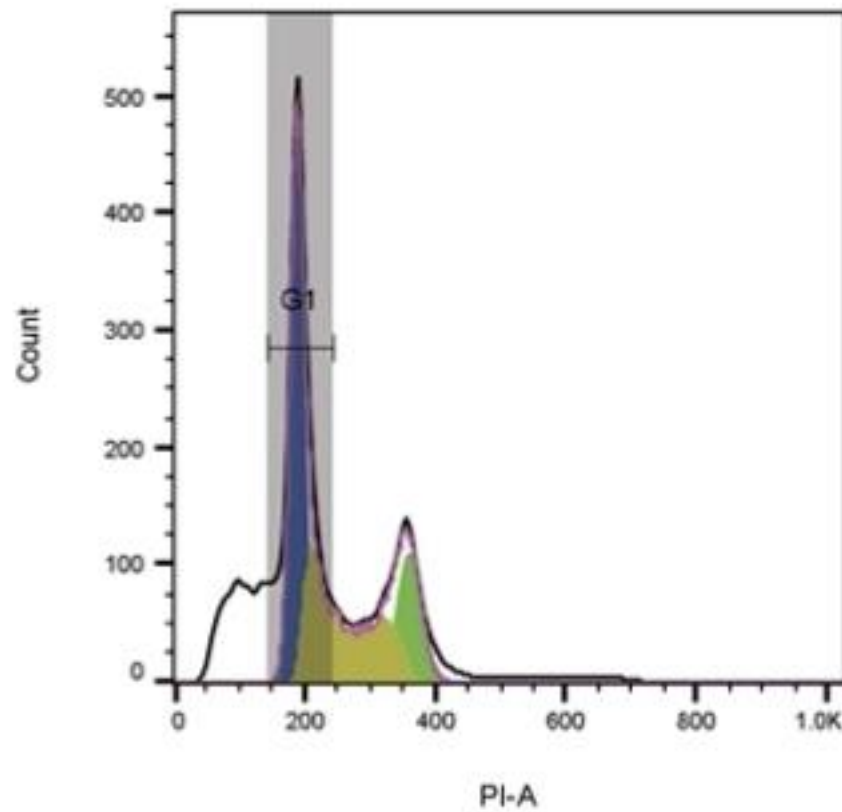

T48\_PC3 1.fcs  
Cell Cycle  
10883

RMSD : 7.37  
%G1 : 32.8  
%S : 26.9  
%G2 : 13.8  
G1 Mean : 190  
G2 Mean : 361  
G1 CV : 7.82  
G2 CV : 7.39  
% less G1 : 21.0  
% greater G2 : 5.41

# T48 PC3- Compound #2 Sample 1

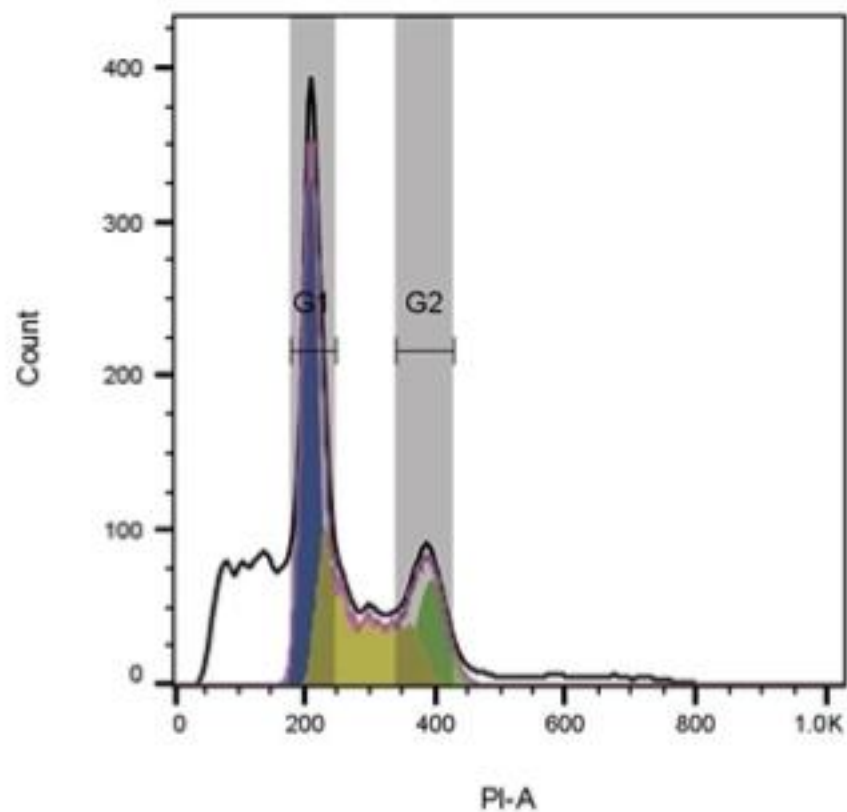

T48\_PC3 2 2.fcs  
Cell Cycle  
10100

RMSD : 7.62  
%G1 : 30.9  
%S : 27.1  
%G2 : 11.4  
G1 Mean : 210  
G2 Mean : 397  
G1 CV : 8.35  
G2 CV : 8.01  
% less G1 : 25.4  
% greater G2 : 5.32

# T48 PC3- Compound #2 Sample 2

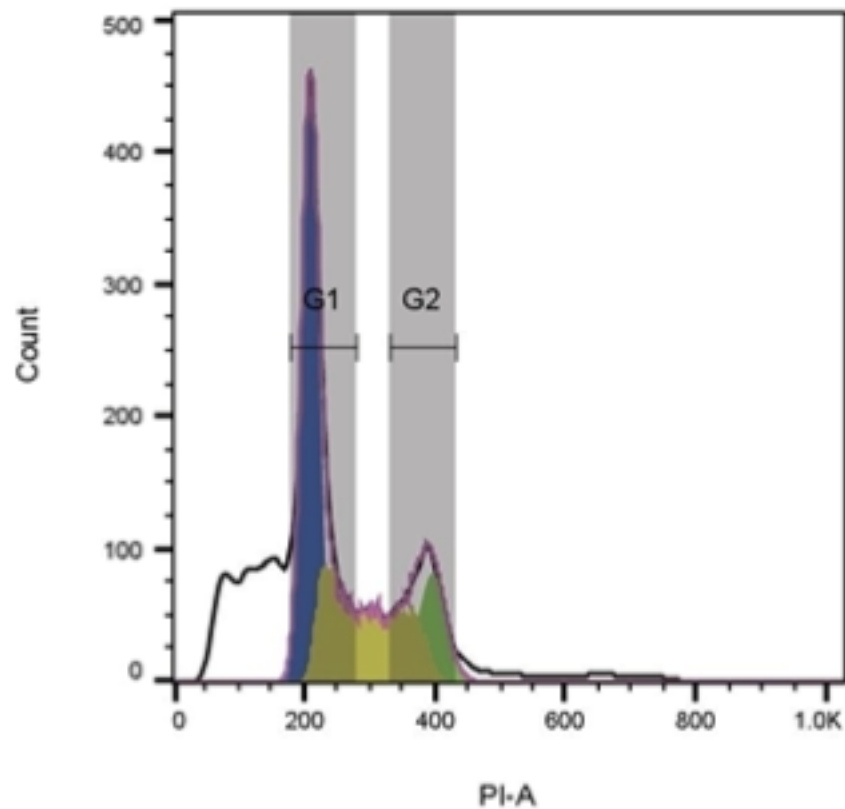

T48\_PC3 2.fcs  
Cell Cycle  
10922

RMSD : 8.08  
%G1 : 34.5  
%S : 25.8  
%G2 : 10.0  
G1 Mean : 210  
G2 Mean : 398  
G1 CV : 8.58  
G2 CV : 7.26  
% less G1 : 24.7  
% greater G2 : 4.93

# T48 PC3- Compound #3 Sample 1

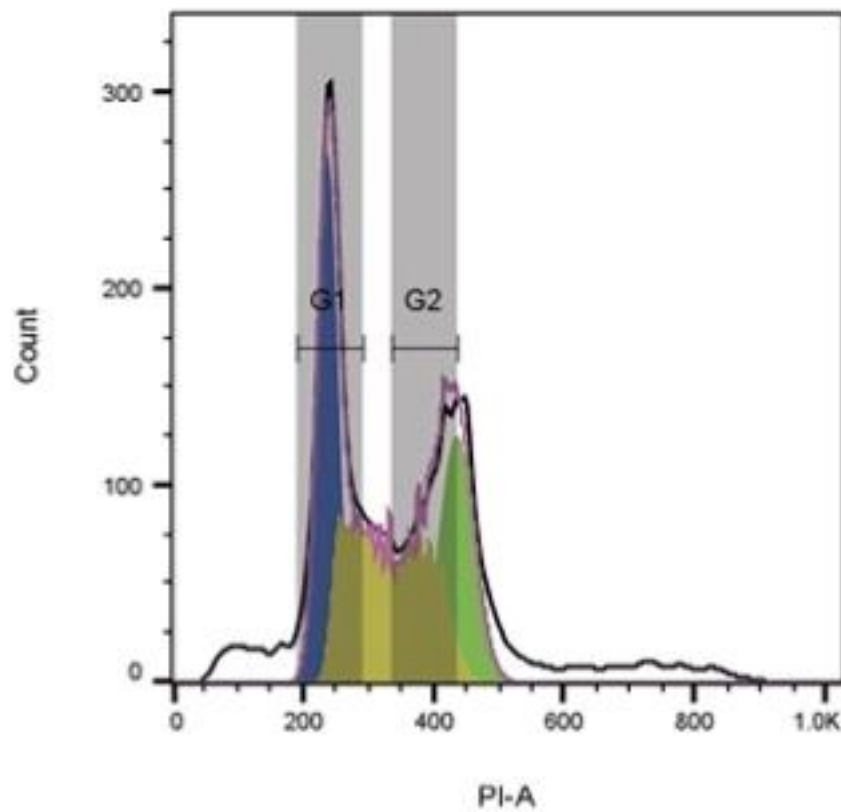

T48\_PC3 3 2.fcs  
Cell Cycle  
10501

RMSD : 3.76  
%G1 : 27.1  
%S : 35.9  
%G2 : 21.7  
G1 Mean : 239  
G2 Mean : 437  
G1 CV : 9.12  
G2 CV : 8.52  
% less G1 : 6.78  
% greater G2 : 11.0

T48 PC3- Compound #3  
Sample 2

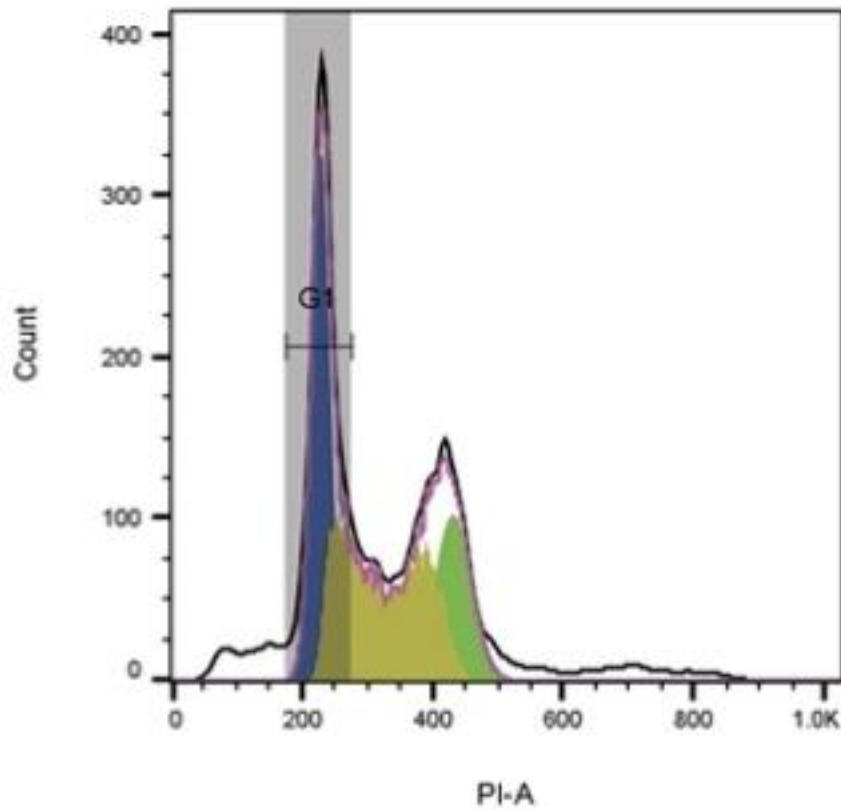

T48\_PC3 3.fcs  
Cell Cycle  
10872

RMSD : 3.47  
%G1 : 30.2  
%S : 38.0  
%G2 : 18.6  
G1 Mean : 229  
G2 Mean : 432  
G1 CV : 8.53  
G2 CV : 8.94  
% less G1 : 7.03  
% greater G2 : 7.03
